# Supplementary material for: Genetic Diversity of Common Olive (Olea europaea L.) Cultivars from Nikita Botanical Gardens Collection Revealed Using RAD-Seq Method
Source: Genes (Basel). 2023 Jun 23;14(7):1323. doi: 10.3390/genes14071323 (PMC10379327; doi:10.3390/genes14071323)
Supplement: Supplementary file 1 [file genes-14-01323-s001.zip]

Archive with 9 entries (9 files):
- Figure S1.pdf
- Figure S2.pdf
- Figure S3.pdf
- Table S1.pdf
- Table S2.pdf
- Table S3.xlsx
- Table S4.xlsx
- Table S5.xlsx
- Table S6.xlsx
