# Supplementary material for: Genetic Diversity of Common Olive (Olea europaea L.) Cultivars from Nikita Botanical Gardens Collection Revealed Using RAD-Seq Method
Source: Genes (Basel). 2023 Jun 23;14(7):1323. doi: 10.3390/genes14071323 (PMC10379327; doi:10.3390/genes14071323)
Supplement: Supplementary file 1 [file genes-14-01323-s001.zip › Table S1.pdf]

Table S1. Samples of *Olea europaea* taken for analysis

| №  | Cultivar                    | Origin                      | Pedigree                                                     |
|----|-----------------------------|-----------------------------|--------------------------------------------------------------|
| 1  | Dalmatica                   | Dalmatia, former Yugoslavia | Old cultivar. Introduction                                   |
| 2  | Ascolano                    | Italy                       | Old cultivar. Introduction                                   |
| 3  | Gukates                     | Albania                     | Old cultivar. Introduction                                   |
| 4  | Tiflisskaya                 | Caucasus                    | Old cultivar. Introduction                                   |
| 5  | Nikitskaya                  | Crimea                      | The cultivar was found during the examination of plantations |
| 6  | Coreggiolo                  | Italy                       | Old cultivar. Introduction                                   |
| 7  | Razzo                       | Italy                       | Old cultivar. Introduction                                   |
| 8  | Leccino                     | Italy                       | Old cultivar. Introduction                                   |
| 9  | Nikitskaya 2                | Crimea                      | The cultivar was found during the examination of plantations |
| 10 | Obilnaya                    | Crimea                      | Coreggiolo x free pollination                                |
| 11 | Kolhoznitsa                 | Crimea                      | Coreggiolo x free pollination                                |
| 12 | Krymskaya<br>Prevoskhodnaya | Crimea                      | Prevoskhodnaya x free pollination                            |
| 13 | Kalinjot                    | Albania                     | Old cultivar. Introduction                                   |
| 14 | Pulazeqin                   | Albania                     | Old cultivar. Introduction                                   |
| 15 | Karren                      | Albania                     | Old cultivar. Introduction                                   |
| 16 | Della Madonna               | Italy                       | Old cultivar. Introduction                                   |
| 17 | Santa Caterina              | Italy                       | Old cultivar. Introduction                                   |
| 18 | Ofelankos                   | Spain                       | Old cultivar. Introduction                                   |
| 19 | Bidza                       | Albania                     | Old cultivar. Introduction                                   |
| 20 | Vajsi i Peqinit             | Albania                     | Old cultivar. Introduction                                   |
| 21 | Miskhorskaya                | Crimea                      | The cultivar was found during the examination of plantations |
| 22 | Nikitskaya 37               | Crimea                      | Perhaps Coreggiolo x free pollination                        |

|    |                   |              |                                                                                                   |
|----|-------------------|--------------|---------------------------------------------------------------------------------------------------|
| 23 | Nikitskaya 6      | Crimea       | The variety was found during the examination of plantations, possibly a relative of Tossiyskaya   |
| 24 | Pikvales          | Italy        | Old cultivar. Introduction                                                                        |
| 25 | Skorospelaya      | Crimea       | Coreggiolo x free pollination                                                                     |
| 26 | Tossiyskaya       | Caucasus     | Old cultivar. Introduction. Parent plants unknown                                                 |
| 27 | Chernaya Rannyaya | Crimea       | Coreggiolo x free pollination                                                                     |
| 28 | ‘Old Olive Tree’  | Crimea       | Nothing is known, it has been growing on the southern coast of Crimea for over 2000 years         |
| 29 | Nikitskaya 35     | Crimea       | The cultivar is selected among the plantations on the southern coast of Crimea                    |
| 30 | Nikitskaya 33     | Crimea       | The cultivar is selected among the plantations on the southern coast of Crimea                    |
| 31 | Nikitskaya 5      | Crimea       | The cultivar was found during the examination of plantations, possibly a relative of Tolgomszkaya |
| 32 | Nikitskaya 29     | Crimea       | The cultivar is selected among the plantations on the southern coast of Crimea                    |
| 33 | D'Elemcen         | North Africa | Imported from Abkhazia in 1901                                                                    |
| 34 | Piangente         | Italy        | Imported from Italy in 1901                                                                       |
| 35 | Tolgomszkaya      | Caucasus     | Imported from Abkhazia in 1902                                                                    |
| 36 | Otur              | Caucasus     | Unknown                                                                                           |
| 37 | Tavlinskaya       | Caucasus     | Received from the Artvinsky olive nursery of the Batumi region in 1910                            |
| 38 | Nisiot            | Albania      | Imported from Albania in 1954                                                                     |
| 39 | Kokermadh Berati  | Albania      | Imported from Albania in 1954                                                                     |
| 40 | D'Espagne         | Spain        | Imported from Abkhazia in 1901                                                                    |
| 41 | Aglandau          | France       | Imported from Abkhazia in 1901                                                                    |

|    |               |            |                                                                                                                          |
|----|---------------|------------|--------------------------------------------------------------------------------------------------------------------------|
| 42 | Lomashenskaya | Caucasus   | Imported from Abkhazia in 1902                                                                                           |
| 43 | Nadzhvijskaya | Caucasus   | Imported from Abkhazia in 1902                                                                                           |
| 44 | Gorvala       | Caucasus   | Received from the Artvinsky olive nursery of the Batumi region in 1902                                                   |
| 45 | Baki-8        | Azerbaijan | Imported from Azerbaijan in 1952                                                                                         |
| 46 | Yubileinaya   | Crimea     | Selected among seedlings of the Rannyaya NBS cultivar, which was obtained by free pollination of the Coreggiolo cultivar |
