# Supplementary material for: Genetic Diversity of Common Olive (Olea europaea L.) Cultivars from Nikita Botanical Gardens Collection Revealed Using RAD-Seq Method
Source: Genes (Basel). 2023 Jun 23;14(7):1323. doi: 10.3390/genes14071323 (PMC10379327; doi:10.3390/genes14071323)
Supplement: Supplementary file 1 [file genes-14-01323-s001.zip › Table S3.xlsx]

## Sheet: Лист1
	Dalmatica	Nikitskaya	Nikitskaya 2	Tiflisskaya	Baki-8	Krymskaya Prevoskhodnaya	Miskhorskaya	Nikitskaya 6	Nikitskaya 5	Obilnaya	Otur	Tavlinskaya	Tolgomskaya	Tossiyskaya	Gorvala	Lomashenskaya	Nadzhvijskaya	Aglandau	Della Madonna	Nikitskaya 29	Nikitskaya 33	Nikitskaya 35	Ascolano	Chernaya Rannyaya	Gukates	Dٰ Espagne	Kalinjot	Kokermadh Berati	Kolhoznitsa	Nikitskaya 37	Nisiot	Ofelankos	Piangente	Pikvales	Pulazeqin	Santa Caterina	Skorospelaya	Dٰ Elemcen	Yubileinaya	Vajsi i Peqinit	Karren	Bidza	Coreggiolo	Leccino	Razzo	‘Old Olive Tree’
Dalmatica	0
Nikitskaya	0.367367	0
Nikitskaya 2	0.366297	0.309656	0
Tiflisskaya	-0.00853267	0.407959	0.408353	0
Baki-8	0.448037	0.449695	0.459948	0.491117	0
Krymskaya Prevoskhodnaya	0.372299	0.320703	0.394329	0.417344	0.506288	0
Miskhorskaya	0.378618	0.018048	0.324629	0.41754	0.460993	0.340524	0
Nikitskaya 6	0.356801	0.314044	0.291024	0.402045	0.46438	0.401462	0.309375	0
Nikitskaya 5	0.379671	0.328236	0.301537	0.421727	0.462182	0.40706	0.346162	0.0522058	0
Obilnaya	0.39256	0.412979	0.398811	0.42586	0.491828	0.438098	0.421414	0.396788	0.419319	0
Otur	0.389443	0.332816	0.0111146	0.432327	0.471105	0.4139	0.352343	0.327523	0.311617	0.421363	0
Tavlinskaya	0.428582	0.405362	0.438331	0.46282	0.498971	0.47872	0.416895	0.444941	0.447005	0.459766	0.44891	0
Tolgomskaya	0.373689	0.347648	0.34172	0.415404	0.475898	0.432119	0.364586	0.343215	0.330936	0.433019	0.35011	0.462216	0
Tossiyskaya	0.371536	0.329193	0.326773	0.407337	0.471711	0.395871	0.318469	0.287221	0.328922	0.337081	0.35464	0.46325	0.32921	0
Gorvala	0.392753	0.013198	0.335059	0.436241	0.464013	0.344142	0.0490781	0.35252	0.340134	0.440724	0.343444	0.418562	0.359716	0.358965	0
Lomashenskaya	0.464027	0.361531	0.366778	0.507885	0.456699	0.488785	0.379779	0.387347	0.369387	0.48584	0.371516	0.469073	0.376116	0.38009	0.369559	0
Nadzhvijskaya	0.386888	0.274069	0.307383	0.425278	0.451176	0.411781	0.294276	0.31706	0.306297	0.439646	0.313412	0.43257	0.32405	0.338773	0.28287	0.362297	0
Aglandau	0.368104	0.391179	0.375375	0.408368	0.498898	0.449275	0.403623	0.385414	0.375963	0.459968	0.38611	0.479571	0.371148	0.400038	0.403554	0.47326	0.393134	0
Della Madonna	0.358509	0.305528	0.286899	0.400871	0.451773	0.380786	0.325874	0.0508936	0.0268811	0.39626	0.307083	0.432069	0.319588	0.307798	0.328912	0.361073	0.297829	0.367897	0
Nikitskaya 29	0.370107	0.504804	0.499145	0.41083	0.560863	0.519519	0.515314	0.496293	0.506923	0.424087	0.518587	0.488869	0.525804	0.512784	0.531163	0.568926	0.52	0.530151	0.485991	0
Nikitskaya 33	0.423042	0.481628	0.484388	0.466336	0.539721	0.50552	0.491235	0.49231	0.499631	0.445818	0.500472	0.469131	0.520004	0.486347	0.505794	0.534733	0.514259	0.527079	0.479637	0.495959	0
Nikitskaya 35	0.403866	0.445737	0.421125	0.450048	0.523114	0.470731	0.4595	0.432595	0.440575	0.335004	0.440484	0.449855	0.45234	0.378104	0.471748	0.485098	0.460282	0.479302	0.418808	0.445497	0.482859	0
Ascolano	0.29811	0.40813	0.395021	0.336963	0.488504	0.315932	0.411863	0.377082	0.409664	0.401519	0.423833	0.470607	0.422144	0.371744	0.442323	0.497049	0.451536	0.424784	0.381845	0.475421	0.472575	0.446662	0
Chernaya Rannyaya	0.408976	0.430284	0.418789	0.439272	0.501048	0.459199	0.425694	0.396094	0.432007	0.342487	0.444797	0.457959	0.44109	0.338808	0.461008	0.480364	0.438482	0.46573	0.412127	0.449408	0.453713	0.353068	0.421069	0
Gukates	0.43148	0.424041	0.431277	0.475819	0.45247	0.483649	0.439164	0.428538	0.428279	0.484587	0.447854	0.492449	0.450234	0.430275	0.444658	0.374156	0.4386	0.451783	0.411514	0.532444	0.503096	0.496771	0.463487	0.486139	0
Dٰ Espagne	0.379772	0.371838	0.383707	0.423002	0.460665	0.42721	0.386814	0.315929	0.329199	0.419113	0.408416	0.427389	0.41022	0.393801	0.399936	0.410846	0.412917	0.436815	0.314329	0.455606	0.421228	0.424034	0.409491	0.394305	0.42409	0
Kalinjot	0.407649	0.390755	0.401089	0.453381	0.36809	0.449605	0.408093	0.409818	0.417039	0.454334	0.421059	0.473944	0.424462	0.421565	0.41659	0.356896	0.391672	0.445013	0.394424	0.515367	0.502449	0.469634	0.445391	0.462358	0.330194	0.40963	0
Kokermadh Berati	0.461648	0.459265	0.46257	0.506224	0.475738	0.515557	0.472054	0.466628	0.453574	0.517417	0.471176	0.516129	0.475127	0.461621	0.469996	0.395157	0.46313	0.478007	0.444038	0.562524	0.533879	0.528838	0.50007	0.516616	0.0167539	0.466049	0.365821	0
Kolhoznitsa	0.388679	0.42014	0.421816	0.431315	0.519197	0.441141	0.43646	0.412645	0.430302	0.320254	0.447294	0.450309	0.445289	0.361267	0.452456	0.500682	0.444713	0.459851	0.403534	0.434832	0.469733	0.34774	0.42584	0.336947	0.496553	0.38942	0.463269	0.537332	0
Nikitskaya 37	0.393603	0.505636	0.494123	0.42237	0.542244	0.51603	0.503171	0.486947	0.517197	0.417529	0.516788	0.490936	0.531515	0.499123	0.534743	0.554804	0.532156	0.521736	0.496795	0.368737	0.46836	0.441144	0.456093	0.417321	0.518332	0.461768	0.502074	0.544764	0.46274	0
Nisiot	0.423698	0.424079	0.421326	0.465956	0.459692	0.477825	0.437207	0.443638	0.435029	0.489244	0.431383	0.488685	0.45719	0.442766	0.437319	0.373086	0.440179	0.44548	0.423426	0.546728	0.51163	0.506704	0.456592	0.492069	0.326236	0.437828	0.337332	0.347004	0.503601	0.52208	0
Ofelankos	0.382445	0.394584	0.399436	0.430574	0.507916	0.416045	0.408911	0.400399	0.416951	0.429475	0.424462	0.468972	0.44855	0.433672	0.424588	0.500886	0.443478	0.445475	0.391609	0.510273	0.465481	0.462828	0.382655	0.458799	0.465494	0.425804	0.447461	0.50727	0.441291	0.5035	0.476799	0
Piangente	0.441341	0.471326	0.47987	0.469292	0.50088	0.499437	0.481927	0.480407	0.489782	0.425999	0.493861	0.412318	0.50183	0.488085	0.49045	0.485808	0.502202	0.495934	0.472917	0.435977	0.334159	0.415943	0.464512	0.415404	0.464583	0.338701	0.464739	0.49014	0.415314	0.42166	0.472624	0.46999	0
Pikvales	0.402037	0.404715	0.407832	0.434724	0.508252	0.440589	0.397599	0.405988	0.437288	0.43005	0.433889	0.474027	0.465062	0.404939	0.432964	0.520826	0.453686	0.457262	0.419124	0.504285	0.475036	0.460772	0.408655	0.446327	0.478789	0.450702	0.469402	0.510277	0.44855	0.487035	0.487712	0.368641	0.485844	0
Pulazeqin	0.381372	0.411108	0.403306	0.406189	0.462427	0.427654	0.41855	0.389456	0.43282	0.411165	0.43583	0.448602	0.448329	0.413963	0.447143	0.470767	0.453908	0.450919	0.40307	0.434991	0.429412	0.418718	0.382022	0.404371	0.418342	0.380565	0.391893	0.457746	0.394073	0.433582	0.445254	0.397791	0.423029	0.422152	0
Santa Caterina	0.384196	0.366249	0.386171	0.428069	0.428955	0.423084	0.380956	0.306321	0.32158	0.422542	0.409076	0.451659	0.404137	0.379168	0.392706	0.385956	0.371921	0.428733	0.298128	0.484762	0.462133	0.439229	0.409777	0.427026	0.391272	0.347382	0.274741	0.428827	0.412077	0.492955	0.401479	0.399058	0.435761	0.446073	0.380681	0
Skorospelaya	0.425282	0.440797	0.455626	0.453414	0.523933	0.491647	0.43723	0.447949	0.483869	0.399138	0.480717	0.454059	0.495564	0.477586	0.472042	0.539192	0.487598	0.491543	0.464319	0.447947	0.432868	0.41846	0.448597	0.382302	0.516658	0.459653	0.493045	0.545944	0.43012	0.412696	0.519898	0.41925	0.43299	0.409996	0.425516	0.461007	0
Dٰ Elemcen	0.379677	0.409689	0.398746	0.409296	0.495717	0.443942	0.424251	0.427141	0.428227	0.429952	0.411152	0.455776	0.437013	0.432752	0.426676	0.496682	0.438135	0.442624	0.413297	0.488695	0.385361	0.452548	0.418993	0.45266	0.468395	0.467325	0.459843	0.492831	0.445716	0.493768	0.473013	0.368884	0.484008	0.348512	0.426265	0.43895	0.350523	0
Yubileinaya	0.383363	0.444147	0.397056	0.437843	0.515433	0.447502	0.45654	0.432701	0.432427	0.415687	0.41226	0.484254	0.457643	0.444109	0.466542	0.50862	0.445265	0.461969	0.416297	0.495788	0.511042	0.469373	0.343852	0.432222	0.509794	0.435327	0.471458	0.54038	0.453167	0.490174	0.50591	0.457004	0.469551	0.464624	0.434325	0.441292	0.462003	0.455667	0
Vajsi i Peqinit	0.394364	0.409934	0.40727	0.446958	0.45737	0.4646	0.423089	0.428221	0.426265	0.470916	0.425337	0.479292	0.452978	0.428884	0.430915	0.373583	0.433142	0.441354	0.412006	0.538525	0.50103	0.497072	0.436793	0.472263	0.318851	0.403667	0.329508	0.350929	0.485186	0.507739	0.0212238	0.457262	0.452622	0.471914	0.401159	0.377532	0.49989	0.45996	0.501692	0
Karren	0.415342	0.441693	0.450387	0.440596	0.481672	0.475968	0.446249	0.436613	0.471277	0.396661	0.475395	0.396554	0.484171	0.452312	0.472502	0.473705	0.486172	0.479496	0.447271	0.409835	0.312291	0.38639	0.427256	0.378857	0.442309	0.302763	0.438511	0.476828	0.380369	0.387882	0.4586	0.436637	0.0215957	0.452306	0.382672	0.404835	0.394323	0.46694	0.444175	0.425921	0
Bidza	0.406512	0.403499	0.403225	0.443159	0.451227	0.464204	0.398067	0.398979	0.429979	0.464072	0.428492	0.479682	0.452214	0.401542	0.434148	0.378557	0.438278	0.440045	0.410853	0.525724	0.492658	0.486833	0.419321	0.453985	0.323955	0.41745	0.32952	0.353637	0.480434	0.484418	0.0553847	0.454954	0.462227	0.450842	0.411852	0.386925	0.481884	0.46318	0.489123	0.0617487	0.427538	0
Coreggiolo	0.42677	0.467393	0.470028	0.457142	0.52848	0.501727	0.474884	0.472285	0.494985	0.334219	0.490655	0.429431	0.505078	0.495968	0.495018	0.548416	0.505965	0.503971	0.470917	0.335917	0.424276	0.333824	0.46034	0.343432	0.526804	0.423498	0.491974	0.557715	0.343158	0.330031	0.53022	0.463738	0.352123	0.46432	0.416265	0.465409	0.298323	0.456366	0.429066	0.509684	0.323979	0.50464	0
Leccino	0.372881	0.394728	0.398036	0.410018	0.495371	0.43368	0.407395	0.40396	0.41072	0.445115	0.417376	0.466354	0.421626	0.42445	0.416838	0.498236	0.428833	0.426412	0.388111	0.498772	0.454743	0.46255	0.401848	0.456137	0.466552	0.438512	0.448306	0.497341	0.445273	0.50107	0.467004	0.334548	0.473367	0.314599	0.402698	0.429197	0.433234	0.325503	0.457721	0.454674	0.45016	0.44956	0.464722	0
Razzo	0.432701	0.468819	0.47786	0.468655	0.506615	0.496683	0.480548	0.477129	0.492736	0.430881	0.497003	0.426247	0.504973	0.488501	0.493663	0.495444	0.504452	0.502936	0.467887	0.444924	0.352846	0.423776	0.461379	0.423134	0.469321	0.339674	0.453032	0.501966	0.420447	0.429793	0.481816	0.460572	0.0734821	0.488288	0.410432	0.414666	0.437	0.489484	0.476744	0.462793	0.0640398	0.465144	0.357547	0.475093	0
‘Old Olive Tree’	0.393143	0.0225655	0.328343	0.427194	0.460211	0.343442	0.00640678	0.319074	0.344909	0.430767	0.351092	0.421079	0.363579	0.326465	0.0446149	0.375024	0.294926	0.404234	0.328549	0.520212	0.495845	0.463072	0.421821	0.437568	0.439368	0.399399	0.414094	0.464977	0.444397	0.512896	0.435364	0.418425	0.490991	0.409672	0.441228	0.391991	0.449698	0.42781	0.456496	0.424534	0.462758	0.406855	0.486337	0.41422	0.49058	0
