# Supplementary material for: Genetic Diversity of Common Olive (Olea europaea L.) Cultivars from Nikita Botanical Gardens Collection Revealed Using RAD-Seq Method
Source: Genes (Basel). 2023 Jun 23;14(7):1323. doi: 10.3390/genes14071323 (PMC10379327; doi:10.3390/genes14071323)
Supplement: Supplementary file 1 [file genes-14-01323-s001.zip › Table S4.xlsx]

## Sheet: Лист1
IID2	IID1	RT	Z0	Z1	Z2	PI_HAT	IBS distance	IBS binomial test	RATIO Of HETHET : IBS 0 SNPs (expected value is 2)
Dalm_3	Dalm_2	OT	0.0965	0.1599	0.7436	0.8236	0.960377	1	33.4375
Dalm_4	Dalm_2	OT	0.2001	0.3237	0.4762	0.638	0.918808	1	14.4211
Dalm_5	Dalm_2	OT	0.1495	0.3413	0.5092	0.6799	0.926977	1	19.75
Dalm_6	Dalm_2	OT	0.1929	0.2073	0.5998	0.7035	0.934751	1	13.7692
Niki_2	Dalm_2	UN	0.824	0.0372	0.1388	0.1574	0.826741	0.7245	2.1166
Niki_2_1	Dalm_2	UN	0.8368	0	0.1632	0.1632	0.826068	0.9747	2.4145
Niki_2_2	Dalm_2	UN	0.8197	0.03	0.1503	0.1653	0.828523	0.9942	2.5586
Niki_2_4	Dalm_2	UN	0.8849	0	0.1151	0.1151	0.813977	0.887	2.2438
Niki_3	Dalm_2	UN	0.8331	0.031	0.1359	0.1514	0.825654	0.7024	2.103
Niki_4	Dalm_2	UN	0.8996	0.0301	0.0703	0.0854	0.812162	0.3298	1.9191
Tifli_1	Dalm_2	UN	0.1336	0.3099	0.5565	0.7115	0.934133	1	16.6061
Tifli_2	Dalm_2	UN	0.1234	0.2877	0.5888	0.7327	0.938971	1	21.3462
Tifli_4	Dalm_2	UN	0.204	0.2579	0.5381	0.6671	0.926199	1	14.0769
Bakin_1	Dalm_2	UN	1	0	0	0	0.786055	0	1.2119
Bakin_2	Dalm_2	UN	1	0	0	0	0.78603	0	1.1301
Bakin_3	Dalm_2	UN	1	0	0	0	0.786746	0	1.1852
KrymP_1	Dalm_2	UN	1	0	0	0	0.826562	0.0431	1.7049
KrymP_2	Dalm_2	UN	1	0	0	0	0.829018	0.069	1.7432
KrymP_3	Dalm_2	UN	0.8141	0	0.1859	0.1859	0.825433	0.0108	1.612
Mishor_1	Dalm_2	UN	0.9094	0.0096	0.081	0.0858	0.8127	0.1738	1.8333
Mishor_2	Dalm_2	UN	0.8851	0.0941	0.0208	0.0679	0.807175	0.2658	1.887
Mishor_3	Dalm_2	UN	0.8818	0.0649	0.0533	0.0857	0.811474	0.1368	1.8077
Nik_6_1	Dalm_2	UN	0.855	0.1347	0.0103	0.0776	0.808281	0.9946	2.5655
Nik_6_3	Dalm_2	UN	0.8756	0.1165	0.0078	0.0661	0.80632	0.9747	2.4145
Niki_5_1	Dalm_2	UN	0.873	0.0093	0.1177	0.1224	0.820195	0.9892	2.5069
Niki_5_2	Dalm_2	UN	0.883	0	0.117	0.117	0.818655	0.9718	2.4067
Niki_5_3	Dalm_2	UN	0.874	0.006	0.12	0.123	0.820394	0.9904	2.5137
Niki_5_4	Dalm_2	UN	0.8579	0.0335	0.1087	0.1254	0.820281	0.9972	2.6224
Obil_1	Dalm_2	UN	1	0	0	0	0.805518	0.8214	2.1796
Obil_3	Dalm_2	UN	1	0	0	0	0.806114	0.6557	2.076
Obil_4	Dalm_2	UN	1	0	0	0	0.789152	0.6876	2.0925
Otur_1	Dalm_2	UN	0.8454	0	0.1546	0.1546	0.823123	0.9398	2.3205
Otur_3	Dalm_2	UN	0.8443	0	0.1557	0.1557	0.822844	0.9687	2.3922
Otur_4	Dalm_2	UN	0.8377	0	0.1623	0.1623	0.824685	0.9764	2.4211
Otur_5	Dalm_2	UN	0.8371	0	0.1629	0.1629	0.826172	0.9795	2.4342
Tavl_1	Dalm_2	UN	1	0	0	0	0.793367	0.0065	1.6029
Tavl_2	Dalm_2	UN	1	0	0	0	0.792684	0.0309	1.6919
Tavl_3	Dalm_2	UN	1	0	0	0	0.794628	0.0754	1.7577
Tavl_4	Dalm_2	UN	1	0	0	0	0.791935	0.0116	1.6337
Tolg_1	Dalm_2	UN	0.7595	0.1004	0.1401	0.1903	0.832089	1	3.1429
Tolg_2	Dalm_2	UN	0.765	0.0971	0.138	0.1865	0.831386	1	3.1667
Tolg_3	Dalm_2	UN	0.7904	0.0522	0.1573	0.1834	0.831747	1	3.0692
Tolg_4	Dalm_2	UN	0.8102	0.0294	0.1603	0.175	0.83053	0.9999	2.9398
Tossi_1	Dalm_2	UN	0.885	0.0796	0.0354	0.0752	0.808988	0.9723	2.4026
Tossi_2	Dalm_2	UN	0.9371	0.0579	0.005	0.0339	0.801024	0.9497	2.3397
Tossi_3	Dalm_2	UN	0.9053	0.0722	0.0226	0.0586	0.805769	0.9398	2.3205
Gorv_1	Dalm_2	UN	0.8535	0.0062	0.1402	0.1434	0.824554	0.5867	2.0417
Gorv_2	Dalm_2	UN	0.858	0.0049	0.1371	0.1395	0.823802	0.4875	1.9941
Gorv_3	Dalm_2	UN	0.8496	0	0.1504	0.1504	0.822251	0.2353	1.8701
Gorv_5	Dalm_2	UN	0.8443	0	0.1557	0.1557	0.821945	0.1224	1.7956
Lomash_1	Dalm_2	UN	1	0	0	0	0.797292	0	1.3657
Lomash_2	Dalm_2	UN	1	0	0	0	0.796705	0	1.2788
Lomash_3	Dalm_2	UN	1	0	0	0	0.796336	0	1.3333
Lomash_4	Dalm_2	UN	1	0	0	0	0.797214	0	1.267
Lomash_5	Dalm_2	UN	1	0	0	0	0.796302	0	1.2121
Nadg_1	Dalm_2	UN	0.795	0.0766	0.1284	0.1667	0.827778	0.9906	2.5172
Nadg_2	Dalm_2	UN	0.8092	0.0539	0.1369	0.1639	0.8277	0.9896	2.5068
Nadg_3	Dalm_2	UN	0.7964	0.0749	0.1288	0.1662	0.827717	0.9942	2.5586
Nadg_4	Dalm_2	UN	0.8378	0	0.1622	0.1622	0.825871	0.9302	2.3072
Nadg_5	Dalm_2	UN	0.8441	0	0.1559	0.1559	0.826032	0.942	2.3289
Agl_1	Dalm_2	UN	0.825	0	0.175	0.175	0.830789	0.9999	2.8864
Agl_2	Dalm_2	UN	0.8254	0	0.1746	0.1746	0.830136	0.9999	2.9231
Agl_3	Dalm_2	UN	0.8309	0.0045	0.1646	0.1669	0.829409	1	3.0078
Agl_4	Dalm_2	UN	0.8118	0	0.1882	0.1882	0.829283	0.9964	2.6056
DelMad_1	Dalm_2	UN	0.8178	0.0887	0.0935	0.1379	0.821614	1	2.9627
DelMad_2	Dalm_2	UN	0.8027	0.1121	0.0852	0.1412	0.821793	0.9998	2.8603
DelMad_3	Dalm_2	UN	0.7614	0.1745	0.0641	0.1514	0.822493	1	3.0152
Niki_29_1	Dalm_2	UN	1	0	0	0	0.814808	0.8521	2.2061
Niki_29_2	Dalm_2	UN	1	0	0	0	0.813405	0.7531	2.1333
Niki_33_1	Dalm_2	UN	1	0	0	0	0.791941	0.0111	1.6324
Niki_33_2	Dalm_2	UN	1	0	0	0	0.79179	0.0048	1.5913
Niki_35_1	Dalm_2	UN	1	0	0	0	0.802974	0.0987	1.7801
Niki_35_2	Dalm_2	UN	1	0	0	0	0.802885	0.1877	1.8457
Asco_2	Dalm_2	UN	0.6944	0.1203	0.1853	0.2454	0.842932	1	3.6404
Asco_4	Dalm_2	UN	0.7276	0.2362	0.0362	0.1543	0.821734	1	3.6607
ChernRan_1	Dalm_2	UN	1	0	0	0	0.789386	0.7796	2.1497
ChernRan_2	Dalm_2	UN	1	0	0	0	0.780819	0.6769	2.0867
ChernRan_3	Dalm_2	UN	1	0	0	0	0.78642	0.3687	1.9399
Guk_2	Dalm_2	UN	1	0	0	0	0.795704	0	1.2902
Guk_4	Dalm_2	UN	1	0	0	0	0.793331	0	1.1453
Guk_5	Dalm_2	UN	1	0	0	0	0.793677	0	1.1149
Ispan_1	Dalm_2	UN	1	0	0	0	0.797886	0	1.3857
Ispan_2	Dalm_2	UN	1	0	0	0	0.794823	0	1.188
Ispan_3	Dalm_2	UN	0.9045	0	0.0955	0.0955	0.810311	0	1.0893
Kali_1	Dalm_2	UN	1	0	0	0	0.800043	0.0008	1.5
Kali_2	Dalm_2	UN	1	0	0	0	0.802687	0.0009	1.5051
Kali_3	Dalm_2	UN	1	0	0	0	0.800493	0.0008	1.5
Koker_1	Dalm_2	UN	1	0	0	0	0.793224	0	1.1545
Koker_2	Dalm_2	UN	1	0	0	0	0.792591	0	1.1631
Koker_3	Dalm_2	UN	1	0	0	0	0.792986	0	1.1561
Koker_4	Dalm_2	UN	1	0	0	0	0.791776	0	1.1803
Kolh_2	Dalm_2	UN	1	0	0	0	0.805012	0.0421	1.7113
Kolh_3	Dalm_2	UN	1	0	0	0	0.801661	0.0113	1.6256
Nik_37_1	Dalm_2	UN	1	0	0	0	0.796292	0.3227	1.9176
Nik_37_2	Dalm_2	UN	1	0	0	0	0.788489	0.1962	1.8511
Nik_37_3	Dalm_2	UN	1	0	0	0	0.792735	0.3016	1.9076
Nisiot_1	Dalm_2	UN	0.9436	0	0.0564	0.0564	0.803037	0.0541	1.7243
Nisiot_2	Dalm_2	UN	1	0	0	0	0.802652	0.0224	1.6649
Nisiot_3	Dalm_2	UN	1	0	0	0	0.802767	0.0224	1.6649
Nisiot_5	Dalm_2	UN	1	0	0	0	0.802109	0.0194	1.6562
Ofel_2	Dalm_2	UN	1	0	0	0	0.803892	0.0362	1.6995
Ofel_3	Dalm_2	UN	1	0	0	0	0.80737	0.0583	1.7358
Pian_1	Dalm_2	UN	1	0	0	0	0.772812	0.1833	1.8454
Pian_2	Dalm_2	UN	1	0	0	0	0.773946	0.1196	1.801
Pian_3	Dalm_2	UN	1	0	0	0	0.772188	0.0521	1.7327
Pian_4	Dalm_2	UN	1	0	0	0	0.771725	0.2446	1.8802
Pikv_1	Dalm_2	UN	1	0	0	0	0.789218	0.1591	1.8242
Pikv_2	Dalm_2	UN	1	0	0	0	0.782103	0.2275	1.8667
Pikv_3	Dalm_2	UN	1	0	0	0	0.78633	0.1829	1.8398
Pul_1	Dalm_2	UN	1	0	0	0	0.7836	0.0782	1.7541
Pul_3	Dalm_2	UN	1	0	0	0	0.782503	0.2333	1.8678
Pul_4	Dalm_2	UN	1	0	0	0	0.75637	0.0035	1.5782
SanKat_1	Dalm_2	UN	1	0	0	0	0.80437	0	1.3744
SanKat_2	Dalm_2	UN	1	0	0	0	0.807311	0	1.3962
SanKat_3	Dalm_2	UN	1	0	0	0	0.804472	0.0002	1.4567
Skoro_2	Dalm_2	UN	1	0	0	0	0.771083	0	1.272
Skoro_3	Dalm_2	UN	1	0	0	0	0.776711	0	1.3191
Skoro_5	Dalm_2	UN	1	0	0	0	0.786968	0.0448	1.72
Tlem_1	Dalm_2	UN	0.9099	0	0.0901	0.0901	0.812191	0.9964	2.5959
Tlem_2	Dalm_2	UN	0.8954	0.0236	0.081	0.0928	0.813828	0.9985	2.6761
Tlem_3	Dalm_2	UN	0.8923	0.0221	0.0856	0.0967	0.814651	0.9993	2.7273
Tlem_4	Dalm_2	UN	0.9066	0.0018	0.0916	0.0925	0.814249	0.9998	2.8273
Ubil_1	Dalm_2	UN	1	0	0	0	0.819561	0.2038	1.8497
Ubil_2	Dalm_2	UN	1	0	0	0	0.817398	0.1332	1.8023
VPec_4	Dalm_2	UN	1	0	0	0	0.80604	0.0049	1.5795
VPec_5	Dalm_2	UN	1	0	0	0	0.804158	0.0045	1.5729
VPec_1	Dalm_2	UN	1	0	0	0	0.789311	0.0825	1.7582
Karre_1	Dalm_2	UN	1	0	0	0	0.782936	0.1207	1.7979
Karre_2	Dalm_2	UN	1	0	0	0	0.765586	0.1209	1.803
Karre_4	Dalm_2	UN	1	0	0	0	0.759735	0.1535	1.8265
Bidz_1	Dalm_2	UN	1	0	0	0	0.791479	0.0741	1.75
Bidz_2	Dalm_2	UN	1	0	0	0	0.783324	0.0213	1.6632
Bidz_3	Dalm_2	UN	1	0	0	0	0.788602	0.013	1.6321
Kore_1	Dalm_2	UN	1	0	0	0	0.78737	0.2555	1.8866
Kore_2	Dalm_2	UN	1	0	0	0	0.790221	0.6285	2.0598
Kore_4	Dalm_2	UN	1	0	0	0	0.769239	0.0664	1.7512
Lecc_1	Dalm_2	UN	0.8928	0.0402	0.067	0.0871	0.812294	0.9962	2.5878
Lecc_2	Dalm_2	UN	0.8815	0.0779	0.0406	0.0796	0.809928	0.9962	2.5878
Lecc_3	Dalm_2	UN	0.9189	0.014	0.0671	0.0741	0.810208	0.993	2.5333
Raco_1	Dalm_2	UN	1	0	0	0	0.781933	0.0315	1.699
Raco_2	Dalm_2	UN	1	0	0	0	0.781578	0.0399	1.7129
Raco_3	Dalm_2	UN	1	0	0	0	0.779022	0.0235	1.6796
OldOli_10	Dalm_2	UN	0.8773	0.0816	0.041	0.0818	0.810307	0.475	1.9882
OldOli_11	Dalm_2	UN	0.9029	0	0.0971	0.0971	0.81342	0.2173	1.8603
OldOli_12	Dalm_2	UN	0.8908	0.0577	0.0515	0.0804	0.810531	0.2752	1.8914
OldOli_13	Dalm_2	UN	0.907	0.0134	0.0796	0.0863	0.812724	0.0589	1.7326
OldOli_14	Dalm_2	UN	0.8879	0.0505	0.0616	0.0869	0.812023	0.2658	1.887
Dalm_4	Dalm_3	OT	0.1504	0.2899	0.5597	0.7047	0.933186	1	21.48
Dalm_5	Dalm_3	OT	0.1316	0.2721	0.5963	0.7324	0.93924	1	21.56
Dalm_6	Dalm_3	OT	0.1538	0.1665	0.6797	0.763	0.947831	1	17.5
Niki_2	Dalm_3	UN	0.8367	0	0.1633	0.1633	0.823646	0.3602	1.9317
Niki_2_1	Dalm_3	UN	1	0	0	0	0.822457	0.6948	2.1006
Niki_2_2	Dalm_3	UN	0.8228	0	0.1772	0.1772	0.824682	0.8673	2.2288
Niki_2_4	Dalm_3	UN	1	0	0	0	0.810476	0.4497	1.9762
Niki_3	Dalm_3	UN	0.8481	0	0.1519	0.1519	0.82129	0.3593	1.9308
Niki_4	Dalm_3	UN	1	0	0	0	0.808259	0.0341	1.6765
Tifli_1	Dalm_3	UN	0.1228	0.2308	0.6464	0.7618	0.946178	1	26.85
Tifli_2	Dalm_3	UN	0.1117	0.1916	0.6967	0.7925	0.953326	1	32.2941
Tifli_4	Dalm_3	UN	0.1598	0.2137	0.6266	0.7334	0.940744	1	21
Bakin_1	Dalm_3	UN	1	0	0	0	0.78866	0	1.2072
Bakin_2	Dalm_3	UN	1	0	0	0	0.788273	0	1.1217
Bakin_3	Dalm_3	UN	1	0	0	0	0.788624	0	1.1385
KrymP_1	Dalm_3	UN	1	0	0	0	0.829849	0.1219	1.7895
KrymP_2	Dalm_3	UN	1	0	0	0	0.832293	0.0286	1.6722
KrymP_3	Dalm_3	UN	1	0	0	0	0.827116	0.0328	1.6707
Mishor_1	Dalm_3	UN	1	0	0	0	0.808023	0.0304	1.6705
Mishor_2	Dalm_3	UN	0.9519	0	0.0481	0.0481	0.802531	0.0226	1.6514
Mishor_3	Dalm_3	UN	0.9198	0	0.0802	0.0802	0.807042	0.015	1.625
Nik_6_1	Dalm_3	UN	0.9187	0.0048	0.0765	0.0789	0.811395	0.9639	2.3916
Nik_6_3	Dalm_3	UN	0.9267	0	0.0733	0.0733	0.809591	0.9579	2.3724
Niki_5_1	Dalm_3	UN	0.8323	0	0.1677	0.1677	0.823273	0.9281	2.3147
Niki_5_2	Dalm_3	UN	0.8352	0	0.1648	0.1648	0.821731	0.8256	2.1933
Niki_5_3	Dalm_3	UN	0.8312	0	0.1688	0.1688	0.823926	0.9393	2.3333
Niki_5_4	Dalm_3	UN	0.8349	0	0.1651	0.1651	0.824285	0.9852	2.4857
Obil_1	Dalm_3	UN	1	0	0	0	0.804373	0.118	1.7935
Obil_3	Dalm_3	UN	1	0	0	0	0.803926	0.1361	1.8066
Obil_4	Dalm_3	UN	1	0	0	0	0.786106	0.064	1.7407
Otur_1	Dalm_3	UN	1	0	0	0	0.819275	0.6002	2.0491
Otur_3	Dalm_3	UN	1	0	0	0	0.818631	0.7051	2.1062
Otur_4	Dalm_3	UN	1	0	0	0	0.820514	0.7576	2.1392
Otur_5	Dalm_3	UN	1	0	0	0	0.821891	0.7765	2.1519
Tavl_1	Dalm_3	UN	1	0	0	0	0.788016	0.0001	1.4138
Tavl_2	Dalm_3	UN	1	0	0	0	0.78688	0.0007	1.4925
Tavl_3	Dalm_3	UN	1	0	0	0	0.788977	0.0031	1.5544
Tavl_4	Dalm_3	UN	1	0	0	0	0.786093	0	1.3951
Tolg_1	Dalm_3	UN	0.806	0	0.194	0.194	0.832499	0.9969	2.6391
Tolg_2	Dalm_3	UN	0.8101	0	0.1899	0.1899	0.831675	0.9976	2.6617
Tolg_3	Dalm_3	UN	0.801	0	0.199	0.199	0.832011	0.998	2.6767
Tolg_4	Dalm_3	UN	0.8002	0	0.1998	0.1998	0.830555	0.9883	2.5071
Tossi_1	Dalm_3	UN	0.8936	0	0.1064	0.1064	0.812766	0.9506	2.3514
Tossi_2	Dalm_3	UN	1	0	0	0	0.804861	0.904	2.2715
Tossi_3	Dalm_3	UN	0.9012	0	0.0988	0.0988	0.809787	0.9605	2.3793
Gorv_1	Dalm_3	UN	0.8528	0	0.1472	0.1472	0.819548	0.1695	1.8221
Gorv_2	Dalm_3	UN	0.8488	0	0.1512	0.1512	0.819916	0.2241	1.8571
Gorv_3	Dalm_3	UN	1	0	0	0	0.817483	0.0355	1.6821
Gorv_5	Dalm_3	UN	1	0	0	0	0.81798	0.0355	1.6821
Lomash_1	Dalm_3	UN	1	0	0	0	0.795365	0	1.1622
Lomash_2	Dalm_3	UN	1	0	0	0	0.794515	0	1.1525
Lomash_3	Dalm_3	UN	1	0	0	0	0.794466	0	1.1982
Lomash_4	Dalm_3	UN	1	0	0	0	0.79484	0	1.0929
Lomash_5	Dalm_3	UN	1	0	0	0	0.793934	0	1.073
Nadg_1	Dalm_3	UN	0.8325	0	0.1675	0.1675	0.826618	0.891	2.2603
Nadg_2	Dalm_3	UN	0.8293	0	0.1707	0.1707	0.826761	0.9185	2.2986
Nadg_3	Dalm_3	UN	0.8332	0	0.1668	0.1668	0.826778	0.9542	2.3688
Nadg_4	Dalm_3	UN	0.815	0	0.185	0.185	0.824744	0.5904	2.0455
Nadg_5	Dalm_3	UN	0.8181	0	0.1819	0.1819	0.824776	0.5775	2.0387
Agl_1	Dalm_3	UN	0.7945	0	0.2055	0.2055	0.831633	0.9973	2.6565
Agl_2	Dalm_3	UN	0.7888	0	0.2112	0.2112	0.831364	0.9969	2.6391
Agl_3	Dalm_3	UN	0.7988	0	0.2012	0.2012	0.831064	0.9944	2.5852
Agl_4	Dalm_3	UN	0.7781	0	0.2219	0.2219	0.831046	0.9671	2.4043
DelMad_1	Dalm_3	UN	0.8426	0	0.1574	0.1574	0.824169	0.9997	2.8231
DelMad_2	Dalm_3	UN	0.8426	0	0.1574	0.1574	0.825653	0.9889	2.5106
DelMad_3	Dalm_3	UN	0.8285	0.0347	0.1367	0.1541	0.826127	0.9996	2.803
Niki_29_1	Dalm_3	UN	1	0	0	0	0.813359	0.6822	2.0926
Niki_29_2	Dalm_3	UN	1	0	0	0	0.811315	0.5	2
Niki_33_1	Dalm_3	UN	1	0	0	0	0.784313	0.0004	1.4783
Niki_33_2	Dalm_3	UN	1	0	0	0	0.783829	0.0001	1.4245
Niki_35_1	Dalm_3	UN	1	0	0	0	0.796842	0.0046	1.5751
Niki_35_2	Dalm_3	UN	1	0	0	0	0.795979	0.0027	1.551
Asco_2	Dalm_3	UN	0.7364	0.0065	0.2571	0.2604	0.848495	1	3.359
Asco_4	Dalm_3	UN	0.7682	0.1244	0.1073	0.1696	0.827316	1	3.2627
ChernRan_1	Dalm_3	UN	1	0	0	0	0.781964	0.0255	1.672
ChernRan_2	Dalm_3	UN	1	0	0	0	0.77305	0.0228	1.6667
ChernRan_3	Dalm_3	UN	1	0	0	0	0.779014	0.0057	1.5909
Guk_2	Dalm_3	UN	1	0	0	0	0.799678	0	1.2689
Guk_4	Dalm_3	UN	1	0	0	0	0.795842	0	1.1991
Guk_5	Dalm_3	UN	1	0	0	0	0.796437	0	1.1131
Ispan_1	Dalm_3	UN	1	0	0	0	0.795908	0	1.2438
Ispan_2	Dalm_3	UN	1	0	0	0	0.794226	0	1.305
Ispan_3	Dalm_3	UN	1	0	0	0	0.810522	0	1.019
Kali_1	Dalm_3	UN	1	0	0	0	0.798577	0.0001	1.398
Kali_2	Dalm_3	UN	1	0	0	0	0.800154	0.001	1.4946
Kali_3	Dalm_3	UN	1	0	0	0	0.800207	0.0006	1.4759
Koker_1	Dalm_3	UN	1	0	0	0	0.796707	0	1.1222
Koker_2	Dalm_3	UN	1	0	0	0	0.795884	0	1.0946
Koker_3	Dalm_3	UN	1	0	0	0	0.796322	0	1.1455
Koker_4	Dalm_3	UN	1	0	0	0	0.795222	0	1.1416
Kolh_2	Dalm_3	UN	1	0	0	0	0.798154	0.0001	1.4356
Kolh_3	Dalm_3	UN	1	0	0	0	0.792611	0	1.3812
Nik_37_1	Dalm_3	UN	1	0	0	0	0.793672	0.041	1.7027
Nik_37_2	Dalm_3	UN	1	0	0	0	0.786231	0.0062	1.5907
Nik_37_3	Dalm_3	UN	1	0	0	0	0.791165	0.0198	1.6543
Nisiot_1	Dalm_3	UN	1	0	0	0	0.806147	0.0263	1.6609
Nisiot_2	Dalm_3	UN	1	0	0	0	0.805415	0.0037	1.5543
Nisiot_3	Dalm_3	UN	1	0	0	0	0.805166	0.0085	1.5944
Nisiot_5	Dalm_3	UN	1	0	0	0	0.80515	0.0071	1.5856
Ofel_2	Dalm_3	UN	1	0	0	0	0.804863	0.0094	1.6054
Ofel_3	Dalm_3	UN	1	0	0	0	0.807065	0.0355	1.6919
Pian_1	Dalm_3	UN	1	0	0	0	0.764665	0	1.3516
Pian_2	Dalm_3	UN	1	0	0	0	0.765791	0	1.3243
Pian_3	Dalm_3	UN	1	0	0	0	0.764096	0	1.3423
Pian_4	Dalm_3	UN	1	0	0	0	0.763384	0.0001	1.4326
Pikv_1	Dalm_3	UN	1	0	0	0	0.792451	0.0732	1.7429
Pikv_2	Dalm_3	UN	1	0	0	0	0.785237	0.1583	1.8176
Pikv_3	Dalm_3	UN	1	0	0	0	0.789358	0.0499	1.7119
Pul_1	Dalm_3	UN	1	0	0	0	0.783991	0.1771	1.8324
Pul_3	Dalm_3	UN	1	0	0	0	0.782735	0.2207	1.8588
Pul_4	Dalm_3	UN	1	0	0	0	0.756849	0.0001	1.4245
SanKat_1	Dalm_3	UN	1	0	0	0	0.803058	0	1.1741
SanKat_2	Dalm_3	UN	1	0	0	0	0.806551	0	1.1713
SanKat_3	Dalm_3	UN	1	0	0	0	0.803555	0	1.2186
Skoro_2	Dalm_3	UN	1	0	0	0	0.764259	0	1.1564
Skoro_3	Dalm_3	UN	1	0	0	0	0.769476	0	1.1875
Skoro_5	Dalm_3	UN	1	0	0	0	0.780593	0.0003	1.4739
Tlem_1	Dalm_3	UN	1	0	0	0	0.810871	0.9186	2.2914
Tlem_2	Dalm_3	UN	1	0	0	0	0.812654	0.9517	2.3562
Tlem_3	Dalm_3	UN	0.8697	0	0.1303	0.1303	0.814785	0.9744	2.4189
Tlem_4	Dalm_3	UN	1	0	0	0	0.812907	0.9686	2.3986
Ubil_1	Dalm_3	UN	1	0	0	0	0.819488	0.0397	1.6932
Ubil_2	Dalm_3	UN	1	0	0	0	0.816866	0.0106	1.6099
VPec_4	Dalm_3	UN	1	0	0	0	0.807813	0.0083	1.5922
VPec_5	Dalm_3	UN	1	0	0	0	0.807245	0.0016	1.511
VPec_1	Dalm_3	UN	1	0	0	0	0.791959	0.0388	1.6897
Karre_1	Dalm_3	UN	1	0	0	0	0.773877	0	1.2569
Karre_2	Dalm_3	UN	1	0	0	0	0.755735	0	1.3274
Karre_4	Dalm_3	UN	1	0	0	0	0.751324	0	1.3084
Bidz_1	Dalm_3	UN	1	0	0	0	0.794332	0.0589	1.7225
Bidz_2	Dalm_3	UN	1	0	0	0	0.785525	0.0175	1.6389
Bidz_3	Dalm_3	UN	1	0	0	0	0.791351	0.0064	1.5801
Kore_1	Dalm_3	UN	1	0	0	0	0.775499	0	1.3203
Kore_2	Dalm_3	UN	1	0	0	0	0.779452	0	1.3649
Kore_4	Dalm_3	UN	1	0	0	0	0.756624	0	1.1958
Lecc_1	Dalm_3	UN	0.873	0	0.127	0.127	0.816843	0.9733	2.4178
Lecc_2	Dalm_3	UN	0.889	0	0.111	0.111	0.815407	0.9139	2.2848
Lecc_3	Dalm_3	UN	0.8754	0	0.1246	0.1246	0.815712	0.9133	2.2829
Raco_1	Dalm_3	UN	1	0	0	0	0.774332	0	1.3394
Raco_2	Dalm_3	UN	1	0	0	0	0.776842	0	1.3378
Raco_3	Dalm_3	UN	1	0	0	0	0.773412	0	1.2973
OldOli_10	Dalm_3	UN	0.9273	0	0.0727	0.0727	0.805797	0.1174	1.7818
OldOli_11	Dalm_3	UN	1	0	0	0	0.809136	0.0108	1.6067
OldOli_12	Dalm_3	UN	0.9172	0	0.0828	0.0828	0.80679	0.0324	1.6744
OldOli_13	Dalm_3	UN	1	0	0	0	0.808306	0.0039	1.5525
OldOli_14	Dalm_3	UN	0.9018	0	0.0982	0.0982	0.809232	0.0403	1.6901
Dalm_5	Dalm_4	OT	0.0333	0.3403	0.6264	0.7965	0.950877	1	88.7143
Dalm_6	Dalm_4	OT	0.0255	0.2567	0.7178	0.8461	0.962864	1	207
Niki_2	Dalm_4	UN	0.8281	0.1719	0	0.086	0.804794	0.9935	2.5479
Niki_2_1	Dalm_4	UN	0.8591	0.1409	0	0.0705	0.803994	0.9957	2.5733
Niki_2_2	Dalm_4	UN	0.8027	0.1973	0	0.0986	0.806314	1	2.9281
Niki_2_4	Dalm_4	UN	0.9025	0	0.0975	0.0975	0.812792	1	3.3603
Niki_3	Dalm_4	UN	0.8228	0.1772	0	0.0886	0.802973	0.9908	2.5135
Niki_4	Dalm_4	UN	0.8989	0.0242	0.0769	0.089	0.813041	1	3.4921
Tifli_1	Dalm_4	UN	0.0301	0.2851	0.6848	0.8273	0.958393	1	103
Tifli_2	Dalm_4	UN	0.03	0.2353	0.7348	0.8524	0.964621	1	156.5
Tifli_4	Dalm_4	UN	0.0265	0.0983	0.8751	0.9243	0.982343	1	164.25
Bakin_1	Dalm_4	UN	1	0	0	0	0.764709	0.0022	1.555
Bakin_2	Dalm_4	UN	1	0	0	0	0.765307	0.0006	1.5023
Bakin_3	Dalm_4	UN	1	0	0	0	0.765199	0.0034	1.5762
KrymP_1	Dalm_4	UN	1	0	0	0	0.801468	0.6701	2.0854
KrymP_2	Dalm_4	UN	1	0	0	0	0.801157	0.7352	2.1235
KrymP_3	Dalm_4	UN	0.8843	0.0885	0.0272	0.0715	0.808032	0.9178	2.2966
Mishor_1	Dalm_4	UN	0.8862	0.0531	0.0608	0.0873	0.812052	1	3.3008
Mishor_2	Dalm_4	UN	0.8864	0.0283	0.0853	0.0995	0.815093	1	3.7619
Mishor_3	Dalm_4	UN	0.8876	0.0361	0.0763	0.0944	0.813872	1	3.5906
Nik_6_1	Dalm_4	UN	0.8214	0.1557	0.0228	0.1007	0.81254	1	4.3964
Nik_6_3	Dalm_4	UN	0.8498	0.116	0.0342	0.0922	0.811673	1	4.375
Niki_5_1	Dalm_4	UN	0.7961	0.2039	0	0.1019	0.800564	0.999	2.7143
Niki_5_2	Dalm_4	UN	0.8279	0.1721	0	0.0861	0.799878	0.9989	2.6972
Niki_5_3	Dalm_4	UN	0.7882	0.2118	0	0.1059	0.801003	0.9995	2.7535
Niki_5_4	Dalm_4	UN	0.7924	0.2076	0	0.1038	0.802136	1	3.0075
Obil_1	Dalm_4	UN	1	0	0	0	0.784445	0.7075	2.1029
Obil_3	Dalm_4	UN	1	0	0	0	0.782786	0.3236	1.9185
Obil_4	Dalm_4	UN	1	0	0	0	0.795092	1	3.2569
Otur_1	Dalm_4	UN	0.8967	0.1033	0	0.0516	0.801676	0.995	2.5556
Otur_3	Dalm_4	UN	0.9143	0.0857	0	0.0429	0.801773	0.9982	2.64
Otur_4	Dalm_4	UN	0.8905	0.1095	0	0.0547	0.803479	0.9993	2.7143
Otur_5	Dalm_4	UN	0.8632	0.1368	0	0.0684	0.804819	0.9985	2.6577
Tavl_1	Dalm_4	UN	1	0	0	0	0.770385	0.2716	1.893
Tavl_2	Dalm_4	UN	1	0	0	0	0.769321	0.5604	2.0279
Tavl_3	Dalm_4	UN	1	0	0	0	0.771108	0.6312	2.0625
Tavl_4	Dalm_4	UN	1	0	0	0	0.770015	0.3135	1.914
Tolg_1	Dalm_4	UN	0.7678	0.2214	0.0108	0.1215	0.815349	1	3.5714
Tolg_2	Dalm_4	UN	0.7641	0.2273	0.0086	0.1223	0.815375	1	3.6724
Tolg_3	Dalm_4	UN	0.7892	0.1913	0.0194	0.1151	0.814701	1	3.5583
Tolg_4	Dalm_4	UN	0.7925	0.1837	0.0238	0.1157	0.814986	1	3.5798
Tossi_1	Dalm_4	UN	0.8277	0.1014	0.071	0.1216	0.818018	1	4.5888
Tossi_2	Dalm_4	UN	0.8692	0.0138	0.1169	0.1239	0.820399	1	5.5263
Tossi_3	Dalm_4	UN	0.8535	0.052	0.0945	0.1205	0.818873	1	5.05
Gorv_1	Dalm_4	UN	0.8176	0.1824	0	0.0912	0.803273	0.9531	2.3484
Gorv_2	Dalm_4	UN	0.837	0.163	0	0.0815	0.803782	0.9531	2.3484
Gorv_3	Dalm_4	UN	0.9122	0.0878	0	0.0439	0.801669	0.8399	2.1975
Gorv_5	Dalm_4	UN	0.9236	0.069	0.0074	0.0419	0.802421	0.8155	2.1768
Lomash_1	Dalm_4	UN	1	0	0	0	0.771382	0.0001	1.4198
Lomash_2	Dalm_4	UN	1	0	0	0	0.770644	0	1.3624
Lomash_3	Dalm_4	UN	1	0	0	0	0.770799	0	1.3364
Lomash_4	Dalm_4	UN	1	0	0	0	0.77106	0	1.2883
Lomash_5	Dalm_4	UN	1	0	0	0	0.770475	0	1.2348
Nadg_1	Dalm_4	UN	0.7784	0.2216	0	0.1108	0.80792	1	3.1
Nadg_2	Dalm_4	UN	0.7808	0.2192	0	0.1096	0.808815	1	3.1484
Nadg_3	Dalm_4	UN	0.7476	0.2524	0	0.1262	0.808074	1	3.272
Nadg_4	Dalm_4	UN	0.87	0.1242	0.0059	0.0679	0.806527	1	3
Nadg_5	Dalm_4	UN	0.8558	0.1442	0	0.0721	0.806762	1	2.9773
Agl_1	Dalm_4	UN	0.7843	0.18	0.0357	0.1257	0.817118	1	3.7876
Agl_2	Dalm_4	UN	0.8022	0.1522	0.0456	0.1217	0.816912	1	3.5714
Agl_3	Dalm_4	UN	0.781	0.1883	0.0306	0.1248	0.816753	1	3.5798
Agl_4	Dalm_4	UN	0.8324	0.0992	0.0684	0.118	0.817318	1	3.3175
DelMad_1	Dalm_4	UN	0.7812	0.2188	0	0.1094	0.801919	1	3.1985
DelMad_2	Dalm_4	UN	0.7567	0.2433	0	0.1216	0.803558	1	3.1439
DelMad_3	Dalm_4	UN	0.7114	0.2886	0	0.1443	0.803993	1	3.1353
Niki_29_1	Dalm_4	UN	0.8431	0.1569	0	0.0785	0.803343	0.9999	2.9538
Niki_29_2	Dalm_4	UN	0.8296	0.1704	0	0.0852	0.802252	0.9999	2.9084
Niki_33_1	Dalm_4	UN	1	0	0	0	0.76927	0.1516	1.8238
Niki_33_2	Dalm_4	UN	1	0	0	0	0.769077	0.1312	1.8093
Niki_35_1	Dalm_4	UN	1	0	0	0	0.777151	0.4511	1.9775
Niki_35_2	Dalm_4	UN	1	0	0	0	0.777266	0.368	1.9392
Asco_2	Dalm_4	UN	0.6432	0.2637	0.0931	0.2249	0.835582	1	5.2841
Asco_4	Dalm_4	UN	0.6436	0.1338	0.2225	0.2894	0.851645	1	8.8095
ChernRan_1	Dalm_4	UN	1	0	0	0	0.783561	0.9998	2.7643
ChernRan_2	Dalm_4	UN	1	0	0	0	0.784959	1	3.6269
ChernRan_3	Dalm_4	UN	1	0	0	0	0.785362	1	3.269
Guk_2	Dalm_4	UN	1	0	0	0	0.77446	0.0032	1.5665
Guk_4	Dalm_4	UN	1	0	0	0	0.769909	0	1.375
Guk_5	Dalm_4	UN	1	0	0	0	0.770968	0	1.3662
Ispan_1	Dalm_4	UN	1	0	0	0	0.77007	0.0004	1.4776
Ispan_2	Dalm_4	UN	1	0	0	0	0.770167	0.0004	1.4755
Ispan_3	Dalm_4	UN	1	0	0	0	0.784627	0	1.2956
Kali_1	Dalm_4	UN	1	0	0	0	0.769748	0.0191	1.6545
Kali_2	Dalm_4	UN	1	0	0	0	0.771068	0.0035	1.5657
Kali_3	Dalm_4	UN	1	0	0	0	0.769003	0.0516	1.7219
Koker_1	Dalm_4	UN	1	0	0	0	0.771701	0.0001	1.4279
Koker_2	Dalm_4	UN	1	0	0	0	0.77147	0	1.4104
Koker_3	Dalm_4	UN	1	0	0	0	0.771662	0.0001	1.4265
Koker_4	Dalm_4	UN	1	0	0	0	0.771049	0.0002	1.4498
Kolh_2	Dalm_4	UN	1	0	0	0	0.778353	0.0305	1.6904
Kolh_3	Dalm_4	UN	1	0	0	0	0.774984	0.0259	1.6737
Nik_37_1	Dalm_4	UN	0.9356	0	0.0644	0.0644	0.804626	1	3.3857
Nik_37_2	Dalm_4	UN	1	0	0	0	0.806886	1	4.032
Nik_37_3	Dalm_4	UN	1	0	0	0	0.806361	1	3.7308
Nisiot_1	Dalm_4	UN	0.8925	0.1075	0	0.0537	0.784156	0.7245	2.1166
Nisiot_2	Dalm_4	UN	1	0	0	0	0.784159	0.6691	2.0843
Nisiot_3	Dalm_4	UN	1	0	0	0	0.784095	0.6583	2.0788
Nisiot_5	Dalm_4	UN	1	0	0	0	0.784077	0.6465	2.0723
Ofel_2	Dalm_4	UN	1	0	0	0	0.776297	0.6079	2.0508
Ofel_3	Dalm_4	UN	1	0	0	0	0.781861	0.5366	2.0169
Pian_1	Dalm_4	UN	1	0	0	0	0.744337	0.1351	1.815
Pian_2	Dalm_4	UN	1	0	0	0	0.744859	0.1406	1.8182
Pian_3	Dalm_4	UN	1	0	0	0	0.743812	0.0286	1.6952
Pian_4	Dalm_4	UN	1	0	0	0	0.744299	0.1419	1.82
Pikv_1	Dalm_4	UN	0.9303	0.0697	0	0.0349	0.794551	1	3.8115
Pikv_2	Dalm_4	UN	0.9687	0.0313	0	0.0156	0.797224	1	4.8942
Pikv_3	Dalm_4	UN	0.9548	0.0452	0	0.0226	0.796622	1	4.5849
Pul_1	Dalm_4	UN	1	0	0	0	0.759231	0.0412	1.7083
Pul_3	Dalm_4	UN	1	0	0	0	0.758899	0.2366	1.8715
Pul_4	Dalm_4	UN	1	0	0	0	0.759809	0.9999	2.8153
SanKat_1	Dalm_4	UN	1	0	0	0	0.771671	0	1.2771
SanKat_2	Dalm_4	UN	1	0	0	0	0.775098	0	1.3498
SanKat_3	Dalm_4	UN	1	0	0	0	0.775275	0	1.3801
Skoro_2	Dalm_4	UN	1	0	0	0	0.777106	0.9999	2.8395
Skoro_3	Dalm_4	UN	1	0	0	0	0.777376	0.9953	2.523
Skoro_5	Dalm_4	UN	1	0	0	0	0.783599	0.9983	2.6108
Tlem_1	Dalm_4	UN	0.7928	0.2072	0	0.1036	0.800657	1	3.4426
Tlem_2	Dalm_4	UN	0.7854	0.2146	0	0.1073	0.801179	1	3.2422
Tlem_3	Dalm_4	UN	0.7675	0.2325	0	0.1163	0.803418	1	3.4206
Tlem_4	Dalm_4	UN	0.7724	0.2276	0	0.1138	0.802598	1	3.5455
Ubil_1	Dalm_4	UN	1	0	0	0	0.800882	0.9599	2.3684
Ubil_2	Dalm_4	UN	1	0	0	0	0.798276	0.9255	2.2987
VPec_4	Dalm_4	UN	1	0	0	0	0.784777	0.2153	1.858
VPec_5	Dalm_4	UN	1	0	0	0	0.783911	0.2053	1.8514
VPec_1	Dalm_4	UN	0.9784	0.0216	0	0.0108	0.793384	1	3.5118
Karre_1	Dalm_4	UN	1	0	0	0	0.752148	0.0981	1.7789
Karre_2	Dalm_4	UN	1	0	0	0	0.754781	0.9977	2.5904
Karre_4	Dalm_4	UN	1	0	0	0	0.754839	0.9996	2.7091
Bidz_1	Dalm_4	UN	0.9785	0.0215	0	0.0108	0.793676	1	3.2761
Bidz_2	Dalm_4	UN	1	0	0	0	0.797337	1	4.0847
Bidz_3	Dalm_4	UN	1	0	0	0	0.796237	1	3.4286
Kore_1	Dalm_4	UN	1	0	0	0	0.754862	0.0737	1.7633
Kore_2	Dalm_4	UN	1	0	0	0	0.756569	0.1425	1.8209
Kore_4	Dalm_4	UN	1	0	0	0	0.762784	0.9181	2.2579
Lecc_1	Dalm_4	UN	0.7844	0.2156	0	0.1078	0.798474	1	3.3701
Lecc_2	Dalm_4	UN	0.7739	0.2261	0	0.1131	0.797654	1	3.0741
Lecc_3	Dalm_4	UN	0.814	0.186	0	0.093	0.797772	1	3.2248
Raco_1	Dalm_4	UN	1	0	0	0	0.747562	0.0012	1.5385
Raco_2	Dalm_4	UN	1	0	0	0	0.747115	0.002	1.5596
Raco_3	Dalm_4	UN	1	0	0	0	0.745765	0.0021	1.5636
OldOli_10	Dalm_4	UN	0.8735	0.0593	0.0673	0.0969	0.813883	1	3.5234
OldOli_11	Dalm_4	UN	0.9023	0	0.0977	0.0977	0.813368	1	3.0643
OldOli_12	Dalm_4	UN	0.8917	0.0247	0.0837	0.096	0.814456	1	3.406
OldOli_13	Dalm_4	UN	0.897	0.027	0.076	0.0895	0.813069	1	3.0496
OldOli_14	Dalm_4	UN	0.8866	0.0339	0.0795	0.0964	0.814339	1	3.2687
Dalm_6	Dalm_5	OT	0.0335	0.1821	0.7844	0.8755	0.970507	1	87.7143
Niki_2	Dalm_5	UN	0.7108	0.1961	0.0931	0.1912	0.830164	1	3.1654
Niki_2_1	Dalm_5	UN	0.7229	0.1841	0.093	0.185	0.829173	1	3.2016
Niki_2_2	Dalm_5	UN	0.6941	0.2234	0.0825	0.1942	0.830182	1	3.4677
Niki_2_4	Dalm_5	UN	0.7913	0.1887	0.02	0.1144	0.814606	1	2.9786
Niki_3	Dalm_5	UN	0.728	0.1767	0.0953	0.1837	0.829053	0.9999	2.9197
Niki_4	Dalm_5	UN	0.7533	0.2319	0.0148	0.1308	0.817015	0.9996	2.773
Tifli_1	Dalm_5	UN	0.0281	0.2233	0.7487	0.8603	0.966504	1	154.75
Tifli_2	Dalm_5	UN	0.0346	0.1792	0.7862	0.8758	0.970643	1	103.333
Tifli_4	Dalm_5	UN	0.0478	0.2552	0.697	0.8246	0.958492	1	89
Bakin_1	Dalm_5	UN	1	0	0	0	0.789802	0.2434	1.8789
Bakin_2	Dalm_5	UN	1	0	0	0	0.789755	0.0653	1.7487
Bakin_3	Dalm_5	UN	1	0	0	0	0.78978	0.2166	1.8646
KrymP_1	Dalm_5	UN	0.8661	0	0.1339	0.1339	0.82254	0.8074	2.1707
KrymP_2	Dalm_5	UN	0.8388	0.0483	0.1128	0.137	0.822331	0.8479	2.205
KrymP_3	Dalm_5	UN	0.735	0.1556	0.1094	0.1872	0.830239	0.9957	2.5971
Mishor_1	Dalm_5	UN	0.7388	0.2513	0.0099	0.1356	0.817571	0.9995	2.766
Mishor_2	Dalm_5	UN	0.7121	0.2879	0	0.1439	0.81156	0.9995	2.7483
Mishor_3	Dalm_5	UN	0.7319	0.2681	0	0.1341	0.815203	0.9989	2.6972
Nik_6_1	Dalm_5	UN	0.6041	0.3959	0	0.198	0.815097	1	3.4435
Nik_6_3	Dalm_5	UN	0.6373	0.3627	0	0.1814	0.814753	1	3.3651
Niki_5_1	Dalm_5	UN	0.6509	0.3086	0.0405	0.1948	0.828426	1	3.2602
Niki_5_2	Dalm_5	UN	0.6853	0.257	0.0577	0.1862	0.827808	1	3.1298
Niki_5_3	Dalm_5	UN	0.6691	0.2795	0.0514	0.1912	0.828328	1	3.2677
Niki_5_4	Dalm_5	UN	0.6572	0.2934	0.0494	0.1961	0.829035	1	3.5246
Obil_1	Dalm_5	UN	0.9083	0.045	0.0467	0.0692	0.808523	0.9849	2.45
Obil_3	Dalm_5	UN	0.9194	0.0432	0.0374	0.059	0.806472	0.919	2.2788
Obil_4	Dalm_5	UN	0.9066	0.0934	0	0.0467	0.789889	0.9687	2.378
Otur_1	Dalm_5	UN	0.7553	0.1525	0.0921	0.1684	0.826463	1	3.2791
Otur_3	Dalm_5	UN	0.7676	0.1364	0.096	0.1642	0.825953	1	3.0882
Otur_4	Dalm_5	UN	0.7345	0.1762	0.0893	0.1774	0.827784	1	3.416
Otur_5	Dalm_5	UN	0.7176	0.1941	0.0883	0.1854	0.829016	1	3.3386
Tavl_1	Dalm_5	UN	0.9574	0.0426	0	0.0213	0.796625	0.8095	2.1676
Tavl_2	Dalm_5	UN	0.9255	0.0745	0	0.0373	0.794904	0.8397	2.1908
Tavl_3	Dalm_5	UN	0.9051	0.0949	0	0.0474	0.79643	0.9184	2.2771
Tavl_4	Dalm_5	UN	1	0	0	0	0.793678	0.7177	2.1086
Tolg_1	Dalm_5	UN	0.6291	0.2603	0.1106	0.2407	0.838892	1	4.1887
Tolg_2	Dalm_5	UN	0.6309	0.2553	0.1137	0.2414	0.839141	1	4.2571
Tolg_3	Dalm_5	UN	0.6486	0.2315	0.1199	0.2357	0.838488	1	4.1869
Tolg_4	Dalm_5	UN	0.6574	0.2218	0.1208	0.2317	0.837893	1	4.1589
Tossi_1	Dalm_5	UN	0.6891	0.3109	0	0.1555	0.817068	1	3.2171
Tossi_2	Dalm_5	UN	0.7044	0.2956	0	0.1478	0.810795	1	3.2403
Tossi_3	Dalm_5	UN	0.6972	0.3028	0	0.1514	0.815543	1	3.2154
Gorv_1	Dalm_5	UN	0.7041	0.2089	0.087	0.1915	0.829946	1	2.9407
Gorv_2	Dalm_5	UN	0.7072	0.2046	0.0882	0.1905	0.829841	1	2.963
Gorv_3	Dalm_5	UN	0.7588	0.1326	0.1086	0.1749	0.828234	0.9992	2.7203
Gorv_5	Dalm_5	UN	0.7725	0.1195	0.108	0.1678	0.827058	0.9972	2.6107
Lomash_1	Dalm_5	UN	0.9707	0	0.0293	0.0293	0.799662	0.0428	1.709
Lomash_2	Dalm_5	UN	1	0	0	0	0.799975	0.0301	1.6842
Lomash_3	Dalm_5	UN	0.9809	0	0.0191	0.0191	0.799053	0.0243	1.6702
Lomash_4	Dalm_5	UN	1	0	0	0	0.799087	0.0111	1.6237
Lomash_5	Dalm_5	UN	1	0	0	0	0.798836	0.0021	1.5446
Nadg_1	Dalm_5	UN	0.6907	0.2106	0.0987	0.204	0.83247	1	3.6356
Nadg_2	Dalm_5	UN	0.683	0.2207	0.0963	0.2066	0.832788	1	3.7069
Nadg_3	Dalm_5	UN	0.6573	0.2602	0.0825	0.2126	0.833129	1	3.9018
Nadg_4	Dalm_5	UN	0.7351	0.161	0.1039	0.1844	0.829549	1	3.4016
Nadg_5	Dalm_5	UN	0.7325	0.1543	0.1132	0.1904	0.830922	1	3.4545
Agl_1	Dalm_5	UN	0.7001	0.1449	0.155	0.2275	0.83872	1	4.2358
Agl_2	Dalm_5	UN	0.7002	0.1492	0.1505	0.2252	0.83815	1	4.1682
Agl_3	Dalm_5	UN	0.6943	0.159	0.1466	0.2262	0.838139	1	4.0636
Agl_4	Dalm_5	UN	0.7306	0.1095	0.1599	0.2147	0.836878	1	3.8246
DelMad_1	Dalm_5	UN	0.6622	0.3029	0.0348	0.1863	0.826815	1	3.5403
DelMad_2	Dalm_5	UN	0.6435	0.3246	0.0319	0.1942	0.827955	1	3.3858
DelMad_3	Dalm_5	UN	0.6165	0.3623	0.0213	0.2024	0.828805	1	3.6446
Niki_29_1	Dalm_5	UN	0.7768	0.1509	0.0723	0.1478	0.822278	1	3.2562
Niki_29_2	Dalm_5	UN	0.7624	0.1711	0.0665	0.1521	0.822711	1	3.5536
Niki_33_1	Dalm_5	UN	1	0	0	0	0.792942	0.4641	1.9839
Niki_33_2	Dalm_5	UN	1	0	0	0	0.792967	0.488	1.9946
Niki_35_1	Dalm_5	UN	0.8704	0.1296	0	0.0648	0.801714	0.7488	2.1279
Niki_35_2	Dalm_5	UN	0.8853	0.1147	0	0.0573	0.801568	0.7858	2.152
Asco_2	Dalm_5	UN	0.5588	0.2529	0.1882	0.3147	0.85419	1	5.5647
Asco_4	Dalm_5	UN	0.5708	0.4012	0.0279	0.2286	0.833301	1	5.3103
ChernRan_1	Dalm_5	UN	0.89	0.11	0	0.055	0.78892	0.9698	2.3851
ChernRan_2	Dalm_5	UN	0.8104	0.1896	0	0.0948	0.78053	0.9907	2.4968
ChernRan_3	Dalm_5	UN	0.8459	0.1541	0	0.077	0.785455	0.9514	2.3333
Guk_2	Dalm_5	UN	1	0	0	0	0.797177	0.1856	1.8432
Guk_4	Dalm_5	UN	1	0	0	0	0.795267	0.0045	1.58
Guk_5	Dalm_5	UN	1	0	0	0	0.796207	0.017	1.6495
Ispan_1	Dalm_5	UN	0.8766	0.1234	0	0.0617	0.803049	0.2535	1.8793
Ispan_2	Dalm_5	UN	0.9657	0.0013	0.033	0.0336	0.802211	0.113	1.7903
Ispan_3	Dalm_5	UN	0.7775	0.222	0.0005	0.1115	0.813287	0.2881	1.88
Kali_1	Dalm_5	UN	0.9171	0.0829	0	0.0414	0.796676	0.4255	1.9651
Kali_2	Dalm_5	UN	0.8962	0.1038	0	0.0519	0.798227	0.2854	1.8966
Kali_3	Dalm_5	UN	0.8581	0.1419	0	0.0709	0.795941	0.4129	1.9591
Koker_1	Dalm_5	UN	1	0	0	0	0.796458	0.0115	1.6276
Koker_2	Dalm_5	UN	1	0	0	0	0.795326	0.0045	1.58
Koker_3	Dalm_5	UN	1	0	0	0	0.795801	0.0134	1.6359
Koker_4	Dalm_5	UN	1	0	0	0	0.796068	0.0237	1.6718
Kolh_2	Dalm_5	UN	0.923	0.0736	0.0034	0.0402	0.801958	0.6769	2.0867
Kolh_3	Dalm_5	UN	0.9641	0.0268	0.0092	0.0226	0.799381	0.6682	2.0833
Nik_37_1	Dalm_5	UN	0.8168	0.1832	0	0.0916	0.800409	0.9987	2.6735
Nik_37_2	Dalm_5	UN	0.8071	0.1929	0	0.0965	0.793859	0.9943	2.5461
Nik_37_3	Dalm_5	UN	0.8668	0.1332	0	0.0666	0.79759	0.9964	2.5906
Nisiot_1	Dalm_5	UN	0.7773	0.2227	0	0.1114	0.811541	0.994	2.5548
Nisiot_2	Dalm_5	UN	0.7944	0.2056	0	0.1028	0.811522	0.9865	2.4797
Nisiot_3	Dalm_5	UN	0.8049	0.1922	0.0028	0.099	0.811377	0.9942	2.5586
Nisiot_5	Dalm_5	UN	0.7927	0.2073	0	0.1037	0.810387	0.9875	2.4865
Ofel_2	Dalm_5	UN	1	0	0	0	0.798188	0.9518	2.3354
Ofel_3	Dalm_5	UN	0.9539	0	0.0461	0.0461	0.802957	0.9184	2.2771
Pian_1	Dalm_5	UN	1	0	0	0	0.77057	0.6282	2.0595
Pian_2	Dalm_5	UN	1	0	0	0	0.771677	0.683	2.0874
Pian_3	Dalm_5	UN	1	0	0	0	0.770094	0.3504	1.9333
Pian_4	Dalm_5	UN	1	0	0	0	0.770288	0.5707	2.0321
Pikv_1	Dalm_5	UN	0.7755	0.2245	0	0.1122	0.79464	0.9996	2.7746
Pikv_2	Dalm_5	UN	0.7348	0.2652	0	0.1326	0.787996	0.9999	2.8905
Pikv_3	Dalm_5	UN	0.7606	0.2394	0	0.1197	0.792958	0.9997	2.8014
Pul_1	Dalm_5	UN	1	0	0	0	0.778676	0.2478	1.8785
Pul_3	Dalm_5	UN	0.8782	0.1218	0	0.0609	0.778929	0.3213	1.9162
Pul_4	Dalm_5	UN	1	0	0	0	0.758659	0.3075	1.9133
SanKat_1	Dalm_5	UN	0.9782	0	0.0218	0.0218	0.798574	0.0012	1.5286
SanKat_2	Dalm_5	UN	0.9618	0.0042	0.034	0.0361	0.80265	0.018	1.6566
SanKat_3	Dalm_5	UN	1	0	0	0	0.800556	0.037	1.7026
Skoro_2	Dalm_5	UN	1	0	0	0	0.766898	0.0015	1.5459
Skoro_3	Dalm_5	UN	1	0	0	0	0.771239	0.0027	1.5714
Skoro_5	Dalm_5	UN	1	0	0	0	0.78484	0.7035	2.0984
Tlem_1	Dalm_5	UN	0.7177	0.2455	0.0367	0.1595	0.822593	1	4.0648
Tlem_2	Dalm_5	UN	0.7063	0.2573	0.0365	0.1651	0.82348	1	3.9091
Tlem_3	Dalm_5	UN	0.6915	0.269	0.0396	0.174	0.825054	1	4.1296
Tlem_4	Dalm_5	UN	0.7075	0.254	0.0385	0.1655	0.823634	1	3.9286
Ubil_1	Dalm_5	UN	0.8508	0	0.1492	0.1492	0.823335	0.9994	2.7536
Ubil_2	Dalm_5	UN	0.8439	0	0.1561	0.1561	0.821243	0.9943	2.5625
VPec_4	Dalm_5	UN	0.83	0.1515	0.0185	0.0942	0.811302	0.9604	2.3709
VPec_5	Dalm_5	UN	0.7938	0.2062	0	0.1031	0.811464	0.9637	2.3826
VPec_1	Dalm_5	UN	0.7335	0.2665	0	0.1332	0.795179	0.9741	2.4091
Karre_1	Dalm_5	UN	0.8721	0.1279	0	0.0639	0.779205	0.4756	1.9888
Karre_2	Dalm_5	UN	1	0	0	0	0.762067	0.7363	2.1186
Karre_4	Dalm_5	UN	1	0	0	0	0.756947	0.6059	2.0489
Bidz_1	Dalm_5	UN	0.729	0.271	0	0.1355	0.797589	0.9934	2.5442
Bidz_2	Dalm_5	UN	0.7052	0.2948	0	0.1474	0.790377	0.9848	2.4636
Bidz_3	Dalm_5	UN	0.7508	0.2492	0	0.1246	0.795213	0.9711	2.4013
Kore_1	Dalm_5	UN	1	0	0	0	0.777475	0.5	2
Kore_2	Dalm_5	UN	1	0	0	0	0.778126	0.6164	2.0535
Kore_4	Dalm_5	UN	1	0	0	0	0.759527	0.1852	1.8477
Lecc_1	Dalm_5	UN	0.7557	0.2289	0.0153	0.1298	0.816879	1	3.6949
Lecc_2	Dalm_5	UN	0.749	0.251	0	0.1255	0.81464	1	3.3047
Lecc_3	Dalm_5	UN	0.7596	0.2376	0.0028	0.1216	0.815008	1	3.6838
Raco_1	Dalm_5	UN	1	0	0	0	0.772862	0.1629	1.8342
Raco_2	Dalm_5	UN	1	0	0	0	0.772361	0.1623	1.8333
Raco_3	Dalm_5	UN	1	0	0	0	0.771905	0.1629	1.8342
OldOli_10	Dalm_5	UN	0.7145	0.2855	0	0.1428	0.815687	0.9997	2.8
OldOli_11	Dalm_5	UN	0.782	0.1899	0.0281	0.123	0.816358	0.9959	2.5762
OldOli_12	Dalm_5	UN	0.7459	0.2541	0	0.127	0.815291	0.9988	2.6828
OldOli_13	Dalm_5	UN	0.757	0.225	0.0181	0.1306	0.817125	0.9973	2.6149
OldOli_14	Dalm_5	UN	0.7339	0.2592	0.0069	0.1365	0.817579	0.9996	2.773
Niki_2	Dalm_6	UN	0.8132	0.0586	0.1281	0.1574	0.826285	0.9832	2.4595
Niki_2_1	Dalm_6	UN	0.846	0	0.154	0.154	0.8259	0.9841	2.4545
Niki_2_2	Dalm_6	UN	0.8207	0.0438	0.1355	0.1574	0.826599	0.9997	2.7778
Niki_2_4	Dalm_6	UN	0.9098	0	0.0902	0.0902	0.812662	0.9866	2.465
Niki_3	Dalm_6	UN	0.8331	0.0457	0.1212	0.144	0.823826	0.967	2.3882
Niki_4	Dalm_6	UN	0.8598	0.0926	0.0476	0.0939	0.81254	0.8262	2.1875
Tifli_1	Dalm_6	UN	0.0258	0.1663	0.808	0.8911	0.974055	1	101
Tifli_2	Dalm_6	UN	0.0245	0.1535	0.822	0.8987	0.975902	1	152.75
Tifli_4	Dalm_6	UN	0.0355	0.1802	0.7843	0.8744	0.970334	1	123.4
Bakin_1	Dalm_6	UN	1	0	0	0	0.788467	0.0006	1.5047
Bakin_2	Dalm_6	UN	1	0	0	0	0.788912	0.0002	1.4587
Bakin_3	Dalm_6	UN	1	0	0	0	0.78976	0.0005	1.5
KrymP_1	Dalm_6	UN	1	0	0	0	0.820661	0.4251	1.9647
KrymP_2	Dalm_6	UN	1	0	0	0	0.821788	0.4498	1.9763
KrymP_3	Dalm_6	UN	0.8301	0	0.1699	0.1699	0.828323	0.7616	2.1447
Mishor_1	Dalm_6	UN	0.8514	0.1011	0.0475	0.0981	0.813201	0.7997	2.1656
Mishor_2	Dalm_6	UN	0.8484	0.1516	0	0.0758	0.807077	0.6337	2.0651
Mishor_3	Dalm_6	UN	0.8507	0.1258	0.0235	0.0864	0.810267	0.6228	2.0599
Nik_6_1	Dalm_6	UN	0.7475	0.2525	0	0.1262	0.809598	1	3.0385
Nik_6_3	Dalm_6	UN	0.8116	0.1884	0	0.0942	0.808925	0.9999	2.8613
Niki_5_1	Dalm_6	UN	0.802	0.0877	0.1103	0.1541	0.824971	0.9996	2.7883
Niki_5_2	Dalm_6	UN	0.817	0.0621	0.1209	0.1519	0.825083	0.9996	2.777
Niki_5_3	Dalm_6	UN	0.8033	0.0844	0.1123	0.1545	0.825115	0.9997	2.8188
Niki_5_4	Dalm_6	UN	0.7959	0.1053	0.0988	0.1514	0.824026	1	2.9624
Obil_1	Dalm_6	UN	1	0	0	0	0.805133	0.5121	2.0056
Obil_3	Dalm_6	UN	1	0	0	0	0.802142	0.1725	1.8368
Obil_4	Dalm_6	UN	1	0	0	0	0.785648	0.3921	1.9508
Otur_1	Dalm_6	UN	0.8351	0	0.1649	0.1649	0.825308	0.9952	2.5629
Otur_3	Dalm_6	UN	0.8388	0	0.1612	0.1612	0.825159	0.9988	2.6757
Otur_4	Dalm_6	UN	0.8502	0	0.1498	0.1498	0.824984	0.9993	2.7192
Otur_5	Dalm_6	UN	0.8486	0.0054	0.146	0.1487	0.825663	0.9989	2.6849
Tavl_1	Dalm_6	UN	1	0	0	0	0.795323	0.4756	1.9888
Tavl_2	Dalm_6	UN	1	0	0	0	0.791236	0.4039	1.9563
Tavl_3	Dalm_6	UN	1	0	0	0	0.794231	0.6541	2.0743
Tavl_4	Dalm_6	UN	1	0	0	0	0.791286	0.2416	1.877
Tolg_1	Dalm_6	UN	0.7315	0.1068	0.1618	0.2152	0.837037	1	3.5339
Tolg_2	Dalm_6	UN	0.7355	0.1045	0.16	0.2122	0.83649	1	3.6034
Tolg_3	Dalm_6	UN	0.7553	0.0797	0.1651	0.2049	0.835537	1	3.4958
Tolg_4	Dalm_6	UN	0.7718	0.0574	0.1708	0.1995	0.834919	1	3.4417
Tossi_1	Dalm_6	UN	0.8084	0.1693	0.0223	0.107	0.813523	1	2.9847
Tossi_2	Dalm_6	UN	0.8554	0.1425	0.0021	0.0734	0.807234	0.9999	2.875
Tossi_3	Dalm_6	UN	0.8376	0.1357	0.0267	0.0946	0.811719	0.9999	2.9403
Gorv_1	Dalm_6	UN	0.8062	0.0744	0.1194	0.1566	0.825762	0.8883	2.2468
Gorv_2	Dalm_6	UN	0.8105	0.0672	0.1223	0.1559	0.82578	0.9476	2.3377
Gorv_3	Dalm_6	UN	0.8435	0	0.1565	0.1565	0.825993	0.8688	2.225
Gorv_5	Dalm_6	UN	0.8446	0	0.1554	0.1554	0.824608	0.7328	2.1205
Lomash_1	Dalm_6	UN	1	0	0	0	0.793505	0	1.3273
Lomash_2	Dalm_6	UN	1	0	0	0	0.793726	0	1.2825
Lomash_3	Dalm_6	UN	1	0	0	0	0.793547	0	1.2467
Lomash_4	Dalm_6	UN	1	0	0	0	0.794719	0	1.2247
Lomash_5	Dalm_6	UN	1	0	0	0	0.793855	0	1.2281
Nadg_1	Dalm_6	UN	0.7685	0.1031	0.1284	0.18	0.829918	1	3.1094
Nadg_2	Dalm_6	UN	0.7596	0.1118	0.1286	0.1845	0.830658	1	3.1746
Nadg_3	Dalm_6	UN	0.7375	0.1455	0.117	0.1898	0.830988	1	3.208
Nadg_4	Dalm_6	UN	0.8217	0	0.1783	0.1783	0.830116	0.9999	2.9394
Nadg_5	Dalm_6	UN	0.8237	0	0.1763	0.1763	0.830402	0.9999	2.9318
Agl_1	Dalm_6	UN	0.7635	0.0401	0.1964	0.2164	0.838761	1	3.6754
Agl_2	Dalm_6	UN	0.7726	0.0194	0.208	0.2177	0.839472	1	3.475
Agl_3	Dalm_6	UN	0.7547	0.0526	0.1928	0.219	0.839022	1	3.475
Agl_4	Dalm_6	UN	0.7722	0	0.2278	0.2278	0.840771	1	3.296
DelMad_1	Dalm_6	UN	0.7978	0.1181	0.0841	0.1431	0.822048	1	3.1061
DelMad_2	Dalm_6	UN	0.7747	0.1492	0.0761	0.1507	0.822916	1	3.1705
DelMad_3	Dalm_6	UN	0.741	0.2037	0.0553	0.1571	0.823027	1	3.2362
Niki_29_1	Dalm_6	UN	0.8643	0	0.1357	0.1357	0.820751	0.999	2.7122
Niki_29_2	Dalm_6	UN	0.8677	0	0.1323	0.1323	0.820641	0.999	2.7143
Niki_33_1	Dalm_6	UN	1	0	0	0	0.790184	0.0229	1.6765
Niki_33_2	Dalm_6	UN	1	0	0	0	0.789967	0.0157	1.6537
Niki_35_1	Dalm_6	UN	1	0	0	0	0.798136	0.4268	1.9663
Niki_35_2	Dalm_6	UN	1	0	0	0	0.797817	0.5368	2.0171
Asco_2	Dalm_6	UN	0.6361	0.1263	0.2375	0.3007	0.854113	1	5.2759
Asco_4	Dalm_6	UN	0.6401	0.2746	0.0853	0.2226	0.834873	1	5.0568
ChernRan_1	Dalm_6	UN	1	0	0	0	0.785064	0.4514	1.9778
ChernRan_2	Dalm_6	UN	1	0	0	0	0.776117	0.7386	2.1214
ChernRan_3	Dalm_6	UN	1	0	0	0	0.782136	0.4758	1.989
Guk_2	Dalm_6	UN	1	0	0	0	0.795231	0.0017	1.5369
Guk_4	Dalm_6	UN	1	0	0	0	0.793466	0	1.2986
Guk_5	Dalm_6	UN	1	0	0	0	0.79416	0	1.2851
Ispan_1	Dalm_6	UN	1	0	0	0	0.793946	0.0015	1.5231
Ispan_2	Dalm_6	UN	1	0	0	0	0.793256	0.0003	1.468
Ispan_3	Dalm_6	UN	0.9278	0	0.0722	0.0722	0.808877	0.0003	1.38
Kali_1	Dalm_6	UN	1	0	0	0	0.791673	0.0099	1.6166
Kali_2	Dalm_6	UN	1	0	0	0	0.7932	0.0032	1.559
Kali_3	Dalm_6	UN	1	0	0	0	0.791325	0.0419	1.7059
Koker_1	Dalm_6	UN	1	0	0	0	0.795441	0	1.3318
Koker_2	Dalm_6	UN	1	0	0	0	0.79448	0	1.3063
Koker_3	Dalm_6	UN	1	0	0	0	0.795086	0	1.3349
Koker_4	Dalm_6	UN	1	0	0	0	0.793509	0	1.3502
Kolh_2	Dalm_6	UN	1	0	0	0	0.79899	0.0975	1.7778
Kolh_3	Dalm_6	UN	1	0	0	0	0.796108	0.0735	1.7486
Nik_37_1	Dalm_6	UN	0.968	0.0268	0.0052	0.0186	0.798572	0.6191	2.0562
Nik_37_2	Dalm_6	UN	0.9678	0.0322	0	0.0161	0.792984	0.6309	2.0621
Nik_37_3	Dalm_6	UN	1	0	0	0	0.796839	0.5963	2.0452
Nisiot_1	Dalm_6	UN	0.9395	0	0.0605	0.0605	0.80693	0.599	2.0479
Nisiot_2	Dalm_6	UN	0.9262	0	0.0738	0.0738	0.807157	0.7239	2.1159
Nisiot_3	Dalm_6	UN	0.9318	0	0.0682	0.0682	0.806902	0.6588	2.0793
Nisiot_5	Dalm_6	UN	0.9355	0	0.0645	0.0645	0.806133	0.599	2.0479
Ofel_2	Dalm_6	UN	1	0	0	0	0.796064	0.4634	1.9832
Ofel_3	Dalm_6	UN	1	0	0	0	0.802024	0.2803	1.8967
Pian_1	Dalm_6	UN	1	0	0	0	0.765009	0.0629	1.7475
Pian_2	Dalm_6	UN	1	0	0	0	0.766749	0.0872	1.7727
Pian_3	Dalm_6	UN	1	0	0	0	0.763971	0.0023	1.5662
Pian_4	Dalm_6	UN	1	0	0	0	0.764559	0.047	1.7268
Pikv_1	Dalm_6	UN	0.885	0.115	0	0.0575	0.792408	0.9764	2.4211
Pikv_2	Dalm_6	UN	0.8637	0.1363	0	0.0681	0.785798	0.9891	2.4966
Pikv_3	Dalm_6	UN	0.9012	0.0988	0	0.0494	0.790838	0.9871	2.48
Pul_1	Dalm_6	UN	1	0	0	0	0.777298	0.0057	1.5909
Pul_3	Dalm_6	UN	1	0	0	0	0.777327	0.0511	1.7204
Pul_4	Dalm_6	UN	1	0	0	0	0.758527	0.0172	1.6602
SanKat_1	Dalm_6	UN	1	0	0	0	0.792972	0	1.2489
SanKat_2	Dalm_6	UN	1	0	0	0	0.797343	0	1.3063
SanKat_3	Dalm_6	UN	1	0	0	0	0.796536	0	1.3591
Skoro_2	Dalm_6	UN	1	0	0	0	0.766206	0.0001	1.44
Skoro_3	Dalm_6	UN	1	0	0	0	0.770964	0.0001	1.4336
Skoro_5	Dalm_6	UN	1	0	0	0	0.783313	0.1916	1.8505
Tlem_1	Dalm_6	UN	0.8411	0.0354	0.1234	0.1412	0.823461	1	3.3387
Tlem_2	Dalm_6	UN	0.7987	0.092	0.1093	0.1553	0.825114	1	3.4667
Tlem_3	Dalm_6	UN	0.7818	0.1352	0.083	0.1506	0.823206	1	3.5
Tlem_4	Dalm_6	UN	0.7998	0.1097	0.0905	0.1453	0.822678	1	3.5798
Ubil_1	Dalm_6	UN	1	0	0	0	0.823528	0.9582	2.3667
Ubil_2	Dalm_6	UN	1	0	0	0	0.822424	0.9801	2.4483
VPec_4	Dalm_6	UN	0.9065	0	0.0935	0.0935	0.808985	0.4497	1.9762
VPec_5	Dalm_6	UN	0.9119	0	0.0881	0.0881	0.808671	0.3759	1.9412
VPec_1	Dalm_6	UN	0.9235	0.0765	0	0.0382	0.790815	0.7452	2.1296
Karre_1	Dalm_6	UN	1	0	0	0	0.773531	0.0345	1.6974
Karre_2	Dalm_6	UN	1	0	0	0	0.756516	0.0229	1.6765
Karre_4	Dalm_6	UN	1	0	0	0	0.750647	0.0362	1.7087
Bidz_1	Dalm_6	UN	0.9412	0.0588	0	0.0294	0.793111	0.7239	2.1159
Bidz_2	Dalm_6	UN	0.9016	0.0984	0	0.0492	0.786391	0.5867	2.0417
Bidz_3	Dalm_6	UN	1	0	0	0	0.791224	0.4749	1.9882
Kore_1	Dalm_6	UN	1	0	0	0	0.773716	0.1285	1.81
Kore_2	Dalm_6	UN	1	0	0	0	0.774483	0.0497	1.7304
Kore_4	Dalm_6	UN	1	0	0	0	0.755876	0.0007	1.5182
Lecc_1	Dalm_6	UN	0.8413	0.0814	0.0773	0.118	0.817716	1	3.2538
Lecc_2	Dalm_6	UN	0.8316	0.1117	0.0568	0.1126	0.815945	1	3.0221
Lecc_3	Dalm_6	UN	0.8397	0.0897	0.0707	0.1155	0.81702	1	3.1692
Raco_1	Dalm_6	UN	1	0	0	0	0.766927	0.0001	1.4493
Raco_2	Dalm_6	UN	1	0	0	0	0.767181	0.0001	1.4537
Raco_3	Dalm_6	UN	1	0	0	0	0.764956	0	1.4199
OldOli_10	Dalm_6	UN	0.8428	0.1363	0.0209	0.0891	0.810584	0.744	2.128
OldOli_11	Dalm_6	UN	0.9018	0.0261	0.0721	0.0851	0.812201	0.6337	2.0651
OldOli_12	Dalm_6	UN	0.8626	0.1023	0.035	0.0862	0.810745	0.6797	2.0898
OldOli_13	Dalm_6	UN	0.8595	0.0825	0.058	0.0992	0.813843	0.3897	1.9486
OldOli_14	Dalm_6	UN	0.8553	0.0935	0.0512	0.098	0.813346	0.7904	2.1585
Niki_2_1	Niki_2	UN	0.4538	0.1917	0.3545	0.4503	0.883297	1	4.7447
Niki_2_2	Niki_2	UN	0.4094	0.235	0.3556	0.4731	0.887006	1	5.9359
Niki_2_4	Niki_2	UN	0.4706	0.2552	0.2742	0.4018	0.871973	1	5.1136
Niki_3	Niki_2	OT	0.0111	0.1572	0.8317	0.9103	0.978182	1	196
Niki_4	Niki_2	OT	0.0155	0.2084	0.7762	0.8803	0.970926	1	97.1667
Tifli_1	Niki_2	UN	0.746	0.1409	0.113	0.1835	0.829807	0.9972	2.6268
Tifli_2	Niki_2	UN	0.7497	0.1458	0.1045	0.1774	0.828448	0.994	2.5548
Tifli_4	Niki_2	UN	0.8595	0.097	0.0435	0.092	0.812043	0.9934	2.5442
Bakin_1	Niki_2	UN	0.8404	0.0251	0.1345	0.147	0.824887	0.4876	1.9942
Bakin_2	Niki_2	UN	0.8468	0	0.1532	0.1532	0.824324	0.107	1.7849
Bakin_3	Niki_2	UN	0.8556	0	0.1444	0.1444	0.824343	0.3203	1.9153
KrymP_1	Niki_2	UN	0.3992	0.4003	0.2006	0.4007	0.868549	1	4.1461
KrymP_2	Niki_2	UN	0.3217	0.4967	0.1816	0.43	0.87242	1	5.1039
KrymP_3	Niki_2	UN	0.2728	0.5333	0.1939	0.4606	0.877875	1	6.129
Mishor_1	Niki_2	UN	0.0355	0.1878	0.7766	0.8706	0.969377	1	58.1
Mishor_2	Niki_2	UN	0.0255	0.2328	0.7417	0.8581	0.96584	1	58.1
Mishor_3	Niki_2	UN	0.0266	0.2071	0.7664	0.8699	0.968821	1	116.6
Nik_6_1	Niki_2	UN	0.4067	0.3753	0.218	0.4057	0.870118	1	5.6795
Nik_6_3	Niki_2	UN	0.4408	0.3311	0.228	0.3936	0.868616	1	5.2651
Niki_5_1	Niki_2	UN	0.4597	0.2256	0.3147	0.4275	0.877878	1	5.15
Niki_5_2	Niki_2	UN	0.4134	0.2827	0.3039	0.4452	0.880252	1	5.2805
Niki_5_3	Niki_2	UN	0.4078	0.3023	0.29	0.4411	0.878974	1	5.321
Niki_5_4	Niki_2	UN	0.4114	0.275	0.3136	0.4511	0.881617	1	5.5125
Obil_1	Niki_2	UN	0.822	0.0465	0.1315	0.1547	0.825998	0.9984	2.6738
Obil_3	Niki_2	UN	0.7777	0.1095	0.1129	0.1676	0.827244	0.9999	2.9237
Obil_4	Niki_2	UN	0.8771	0.1128	0.0101	0.0665	0.806482	0.9979	2.6458
Otur_1	Niki_2	UN	0.4639	0.189	0.347	0.4415	0.881556	1	5.0795
Otur_3	Niki_2	UN	0.4383	0.229	0.3327	0.4472	0.881842	1	5.4096
Otur_4	Niki_2	UN	0.4495	0.2	0.3504	0.4505	0.883141	1	5.3412
Otur_5	Niki_2	UN	0.4416	0.2029	0.3555	0.457	0.884404	1	5.3412
Tavl_1	Niki_2	UN	0.568	0.4192	0.0129	0.2224	0.831656	0.9999	2.935
Tavl_2	Niki_2	UN	0.5576	0.4424	0	0.2212	0.830421	1	3.075
Tavl_3	Niki_2	UN	0.5509	0.4437	0.0054	0.2272	0.832095	1	3.0917
Tavl_4	Niki_2	UN	0.6099	0.3639	0.0262	0.2082	0.829951	0.9996	2.8203
Tolg_1	Niki_2	UN	0.4839	0.1667	0.3494	0.4327	0.880244	1	4.6082
Tolg_2	Niki_2	UN	0.4925	0.1622	0.3453	0.4264	0.879042	1	4.6979
Tolg_3	Niki_2	UN	0.5012	0.1466	0.3522	0.4255	0.879205	1	4.6667
Tolg_4	Niki_2	UN	0.51	0.1326	0.3573	0.4237	0.879137	1	4.4848
Tossi_1	Niki_2	UN	0.4819	0.278	0.2401	0.3791	0.866824	1	5.3095
Tossi_2	Niki_2	UN	0.5247	0.2603	0.215	0.3451	0.86026	1	4.8444
Tossi_3	Niki_2	UN	0.5202	0.2402	0.2396	0.3597	0.863685	1	4.6526
Gorv_1	Niki_2	UN	0.0188	0.1102	0.871	0.9261	0.982452	1	73.375
Gorv_2	Niki_2	UN	0.0199	0.1013	0.8788	0.9294	0.983333	1	147
Gorv_3	Niki_2	UN	0.0321	0.122	0.8458	0.9068	0.97825	1	96.5
Gorv_5	Niki_2	UN	0.0487	0.103	0.8483	0.8998	0.977224	1	82.5714
Lomash_1	Niki_2	UN	0.2595	0.6017	0.1388	0.4397	0.872097	1	7.0175
Lomash_2	Niki_2	UN	0.2687	0.5858	0.1455	0.4384	0.872179	1	7.1429
Lomash_3	Niki_2	UN	0.26	0.6108	0.1292	0.4346	0.870857	1	6.6949
Lomash_4	Niki_2	UN	0.2978	0.5533	0.1488	0.4255	0.870257	1	5.9692
Lomash_5	Niki_2	UN	0.2958	0.557	0.1472	0.4257	0.870224	1	6.3065
Nadg_1	Niki_2	UN	0.302	0.2258	0.4722	0.5851	0.91012	1	8.2034
Nadg_2	Niki_2	UN	0.3043	0.2255	0.4702	0.583	0.909693	1	7.5625
Nadg_3	Niki_2	UN	0.3025	0.2309	0.4666	0.5821	0.90939	1	7.4844
Nadg_4	Niki_2	UN	0.3302	0.2013	0.4685	0.5691	0.907396	1	7.4444
Nadg_5	Niki_2	UN	0.3233	0.2192	0.4576	0.5672	0.906603	1	7.3125
Agl_1	Niki_2	UN	0.632	0.0905	0.2774	0.3227	0.859401	1	4.165
Agl_2	Niki_2	UN	0.6621	0.0505	0.2874	0.3127	0.858227	1	3.7568
Agl_3	Niki_2	UN	0.6452	0.0723	0.2825	0.3187	0.858975	1	3.7168
Agl_4	Niki_2	UN	0.6899	0	0.3101	0.3101	0.858677	1	3.3607
DelMad_1	Niki_2	UN	0.3886	0.3204	0.291	0.4512	0.88065	1	6.5571
DelMad_2	Niki_2	UN	0.3609	0.339	0.3	0.4695	0.883988	1	6.5571
DelMad_3	Niki_2	UN	0.3375	0.4014	0.2611	0.4618	0.881025	1	6.7206
Niki_29_1	Niki_2	UN	1	0	0	0	0.782483	0	1.2428
Niki_29_2	Niki_2	UN	1	0	0	0	0.782489	0	1.2614
Niki_33_1	Niki_2	UN	1	0	0	0	0.794864	0.0072	1.6098
Niki_33_2	Niki_2	UN	1	0	0	0	0.794427	0.0002	1.4658
Niki_35_1	Niki_2	UN	0.8341	0.1094	0.0565	0.1112	0.815711	0.8039	2.172
Niki_35_2	Niki_2	UN	0.8224	0.136	0.0416	0.1096	0.814795	0.9139	2.2848
Asco_2	Niki_2	UN	0.7635	0.0989	0.1376	0.1871	0.831462	0.9984	2.6763
Asco_4	Niki_2	UN	0.7727	0.2273	0	0.1137	0.807735	0.9608	2.3733
ChernRan_1	Niki_2	UN	0.8559	0.1441	0	0.0721	0.806804	0.8939	2.2532
ChernRan_2	Niki_2	UN	0.8202	0.1798	0	0.0899	0.796455	0.7124	2.1084
ChernRan_3	Niki_2	UN	0.9014	0.0986	0	0.0493	0.801306	0.7118	2.1078
Guk_2	Niki_2	UN	0.77	0.0478	0.1822	0.2061	0.836485	0.9599	2.3684
Guk_4	Niki_2	UN	0.8003	0.0164	0.1834	0.1916	0.834195	0.5125	2.0059
Guk_5	Niki_2	UN	0.8009	0	0.1991	0.1991	0.833614	0.636	2.0675
Ispan_1	Niki_2	UN	0.6157	0.3798	0.0046	0.1944	0.826793	0.8375	2.2148
Ispan_2	Niki_2	UN	0.6235	0.375	0.0015	0.189	0.825788	0.9792	2.4729
Ispan_3	Niki_2	UN	0.4389	0.5134	0.0477	0.3044	0.846348	0.9657	2.5055
Kali_1	Niki_2	UN	0.6099	0.264	0.126	0.2581	0.842355	0.9995	2.7895
Kali_2	Niki_2	UN	0.6102	0.2613	0.1285	0.2591	0.84264	0.9979	2.6716
Kali_3	Niki_2	UN	0.623	0.2509	0.1262	0.2516	0.841327	0.9997	2.8397
Koker_1	Niki_2	UN	0.805	0	0.195	0.195	0.832044	0.5504	2.0242
Koker_2	Niki_2	UN	0.7996	0	0.2004	0.2004	0.833162	0.6601	2.0807
Koker_3	Niki_2	UN	0.8012	0	0.1988	0.1988	0.83348	0.7035	2.1043
Koker_4	Niki_2	UN	0.8059	0	0.1941	0.1941	0.831941	0.725	2.1173
Kolh_2	Niki_2	UN	0.8446	0.0238	0.1316	0.1435	0.824196	0.9864	2.4861
Kolh_3	Niki_2	UN	0.794	0.0917	0.1142	0.1601	0.826103	0.9159	2.2905
Nik_37_1	Niki_2	UN	1	0	0	0	0.764073	0	1.0644
Nik_37_2	Niki_2	UN	1	0	0	0	0.756644	0	1.0224
Nik_37_3	Niki_2	UN	1	0	0	0	0.759644	0	1.0415
Nisiot_1	Niki_2	UN	0.6232	0.272	0.1048	0.2408	0.83865	1	3.2807
Nisiot_2	Niki_2	UN	0.6323	0.2573	0.1103	0.239	0.838604	0.9995	2.8062
Nisiot_3	Niki_2	UN	0.6515	0.2278	0.1207	0.2346	0.838354	0.9998	2.8968
Nisiot_5	Niki_2	UN	0.635	0.2454	0.1196	0.2423	0.83954	1	3.0248
Ofel_2	Niki_2	UN	0.7492	0.1025	0.1483	0.1995	0.833932	0.9855	2.473
Ofel_3	Niki_2	UN	0.7676	0.0515	0.1809	0.2067	0.836511	0.898	2.2562
Pian_1	Niki_2	UN	1	0	0	0	0.767902	0.0083	1.6111
Pian_2	Niki_2	UN	1	0	0	0	0.769379	0.006	1.5918
Pian_3	Niki_2	UN	1	0	0	0	0.766426	0.0015	1.5297
Pian_4	Niki_2	UN	1	0	0	0	0.765988	0.0125	1.6327
Pikv_1	Niki_2	UN	0.7713	0.1601	0.0686	0.1487	0.822258	0.9999	2.8815
Pikv_2	Niki_2	UN	0.8165	0.1467	0.0368	0.1101	0.814663	1	2.9851
Pikv_3	Niki_2	UN	0.8017	0.1198	0.0785	0.1384	0.821038	0.9999	2.9037
Pul_1	Niki_2	UN	0.9315	0.0685	0	0.0342	0.786249	0.1887	1.8418
Pul_3	Niki_2	UN	0.8443	0.1557	0	0.0778	0.789207	0.563	2.0305
Pul_4	Niki_2	UN	1	0	0	0	0.757708	0.0013	1.5291
SanKat_1	Niki_2	UN	0.6823	0.1606	0.1571	0.2374	0.8404	0.9944	2.5852
SanKat_2	Niki_2	UN	0.6458	0.1985	0.1556	0.2549	0.843149	0.9986	2.7099
SanKat_3	Niki_2	UN	0.6734	0.1414	0.1851	0.2559	0.844602	0.9991	2.7444
Skoro_2	Niki_2	UN	1	0	0	0	0.788867	0.0001	1.4258
Skoro_3	Niki_2	UN	1	0	0	0	0.793701	0.0001	1.4265
Skoro_5	Niki_2	UN	0.9005	0.0914	0.0081	0.0538	0.804352	0.4021	1.9545
Tlem_1	Niki_2	UN	0.8216	0	0.1784	0.1784	0.831276	0.9646	2.3734
Tlem_2	Niki_2	UN	0.7846	0.0503	0.1651	0.1902	0.833177	0.9891	2.4966
Tlem_3	Niki_2	UN	0.7976	0.0342	0.1681	0.1852	0.832512	0.9811	2.4359
Tlem_4	Niki_2	UN	0.8157	0.0116	0.1727	0.1785	0.831635	0.9366	2.3086
Ubil_1	Niki_2	UN	0.7869	0	0.2131	0.2131	0.831714	0.2734	1.8895
Ubil_2	Niki_2	UN	0.7885	0	0.2115	0.2115	0.830142	0.0863	1.7611
VPec_4	Niki_2	UN	0.629	0.26	0.111	0.241	0.838963	0.999	2.7442
VPec_5	Niki_2	UN	0.6113	0.2862	0.1025	0.2456	0.839313	0.9996	2.832
VPec_1	Niki_2	UN	0.6182	0.3818	0	0.1909	0.825028	0.9999	2.9756
Karre_1	Niki_2	UN	0.6966	0.3034	0	0.1517	0.781295	0.1296	1.7965
Karre_2	Niki_2	UN	0.7287	0.2713	0	0.1356	0.76102	0.0337	1.6898
Karre_4	Niki_2	UN	1	0	0	0	0.753839	0.0007	1.5024
Bidz_1	Niki_2	UN	0.5849	0.4151	0	0.2076	0.826779	1	3.1282
Bidz_2	Niki_2	UN	0.6042	0.3958	0	0.1979	0.819758	0.9999	2.9758
Bidz_3	Niki_2	UN	0.6408	0.3592	0	0.1796	0.823688	1	3.1
Kore_1	Niki_2	UN	1	0	0	0	0.784126	0.001	1.53
Kore_2	Niki_2	UN	1	0	0	0	0.782767	0	1.4115
Kore_4	Niki_2	UN	1	0	0	0	0.764937	0	1.2875
Lecc_1	Niki_2	UN	0.6699	0.2423	0.0878	0.209	0.832789	1	3.1085
Lecc_2	Niki_2	UN	0.662	0.2457	0.0923	0.2151	0.833976	1	3.2063
Lecc_3	Niki_2	UN	0.6825	0.2142	0.1033	0.2104	0.833707	1	2.9773
Raco_1	Niki_2	UN	1	0	0	0	0.774626	0	1.371
Raco_2	Niki_2	UN	1	0	0	0	0.777132	0.0001	1.4372
Raco_3	Niki_2	UN	1	0	0	0	0.77427	0.0006	1.4952
OldOli_10	Niki_2	UN	0.0634	0.1836	0.753	0.8448	0.964202	1	72.625
OldOli_11	Niki_2	UN	0.0221	0.2164	0.7615	0.8697	0.96857	1	116
OldOli_12	Niki_2	UN	0.0189	0.2231	0.7581	0.8696	0.968408	1	96.5
OldOli_13	Niki_2	UN	0.0156	0.2265	0.7579	0.8711	0.968644	1	144.75
OldOli_14	Niki_2	UN	0.0244	0.203	0.7726	0.8741	0.969769	1	82.5714
Niki_2_2	Niki_2_1	OT	0.0211	0.0866	0.8923	0.9356	0.984917	1	153.5
Niki_2_4	Niki_2_1	OT	0.02	0.2042	0.7758	0.8779	0.970519	1	120.8
Niki_3	Niki_2_1	UN	0.4427	0.2166	0.3407	0.449	0.882476	1	5.5301
Niki_4	Niki_2_1	UN	0.4671	0.253	0.2799	0.4064	0.872963	1	5.1023
Tifli_1	Niki_2_1	UN	0.7791	0.0991	0.1217	0.1713	0.82823	0.9989	2.6944
Tifli_2	Niki_2_1	UN	0.7815	0.0966	0.1219	0.1702	0.828062	0.9948	2.5563
Tifli_4	Niki_2_1	UN	0.8858	0.0529	0.0613	0.0878	0.812157	0.9927	2.5263
Bakin_1	Niki_2_1	UN	0.8821	0.0023	0.1155	0.1167	0.819188	0.1929	1.847
Bakin_2	Niki_2_1	UN	0.8613	0	0.1387	0.1387	0.819445	0.0868	1.7672
Bakin_3	Niki_2_1	UN	0.8723	0	0.1277	0.1277	0.819037	0.2676	1.8889
KrymP_1	Niki_2_1	UN	0.7671	0	0.2329	0.2329	0.842155	0.9986	2.7154
KrymP_2	Niki_2_1	UN	0.7507	0.0134	0.2358	0.2426	0.844697	0.9999	2.9762
KrymP_3	Niki_2_1	UN	0.6151	0.1912	0.1937	0.2893	0.850356	0.9997	2.8689
Mishor_1	Niki_2_1	UN	0.4796	0.2356	0.2847	0.4025	0.872546	1	5.3333
Mishor_2	Niki_2_1	UN	0.4691	0.2973	0.2336	0.3822	0.867039	1	5.1023
Mishor_3	Niki_2_1	UN	0.4747	0.2641	0.2612	0.3932	0.870017	1	5.1839
Nik_6_1	Niki_2_1	UN	0.2649	0.5185	0.2166	0.4758	0.881324	1	7.3125
Nik_6_3	Niki_2_1	UN	0.2993	0.4708	0.2299	0.4653	0.880219	1	6.6286
Niki_5_1	Niki_2_1	UN	0.3016	0.3707	0.3277	0.5131	0.8922	1	7.2222
Niki_5_2	Niki_2_1	UN	0.3	0.3569	0.343	0.5215	0.894227	1	6.4507
Niki_5_3	Niki_2_1	UN	0.296	0.3659	0.3381	0.521	0.893929	1	6.8088
Niki_5_4	Niki_2_1	UN	0.2833	0.3841	0.3326	0.5246	0.894271	1	7.3438
Obil_1	Niki_2_1	UN	0.6892	0.2235	0.0873	0.1991	0.831178	1	3.0388
Obil_3	Niki_2_1	UN	0.694	0.2186	0.0874	0.1967	0.830793	1	3.0236
Obil_4	Niki_2_1	UN	0.7067	0.2933	0	0.1466	0.8125	0.9997	2.8235
Otur_1	Niki_2_1	UN	0.019	0.1134	0.8676	0.9243	0.982023	1	153
Otur_3	Niki_2_1	UN	0.0178	0.1123	0.8699	0.926	0.982393	1	202.333
Otur_4	Niki_2_1	UN	0.0145	0.0958	0.8897	0.9376	0.985126	1	306.5
Otur_5	Niki_2_1	UN	0.0178	0.0942	0.888	0.9351	0.984643	1	306.5
Tavl_1	Niki_2_1	UN	0.8021	0.1606	0.0372	0.1175	0.815876	0.9933	2.5571
Tavl_2	Niki_2_1	UN	0.778	0.2076	0.0143	0.1182	0.814967	0.997	2.6304
Tavl_3	Niki_2_1	UN	0.761	0.2256	0.0134	0.1262	0.816225	0.9996	2.8092
Tavl_4	Niki_2_1	UN	0.8455	0.1053	0.0492	0.1018	0.813875	0.9927	2.55
Tolg_1	Niki_2_1	UN	0.3838	0.3245	0.2917	0.4539	0.881112	1	6.7826
Tolg_2	Niki_2_1	UN	0.3947	0.3094	0.2959	0.4506	0.88076	1	6.7826
Tolg_3	Niki_2_1	UN	0.4146	0.2795	0.3059	0.4456	0.880404	1	6.4444
Tolg_4	Niki_2_1	UN	0.4146	0.2836	0.3018	0.4436	0.879902	1	6.3425
Tossi_1	Niki_2_1	UN	0.444	0.322	0.234	0.395	0.8691	1	5.1011
Tossi_2	Niki_2_1	UN	0.4671	0.3286	0.2043	0.3686	0.863556	1	5.4048
Tossi_3	Niki_2_1	UN	0.4592	0.3142	0.2266	0.3837	0.866972	1	5.4048
Gorv_1	Niki_2_1	UN	0.4757	0.149	0.3753	0.4498	0.884126	1	5.2674
Gorv_2	Niki_2_1	UN	0.4445	0.1958	0.3597	0.4576	0.884692	1	5.2069
Gorv_3	Niki_2_1	UN	0.4844	0.1469	0.3688	0.4422	0.882618	1	4.9451
Gorv_5	Niki_2_1	UN	0.475	0.1576	0.3674	0.4462	0.883198	1	5.3412
Lomash_1	Niki_2_1	UN	0.3209	0.5013	0.1778	0.4285	0.87201	1	7.4828
Lomash_2	Niki_2_1	UN	0.3079	0.5185	0.1735	0.4328	0.872515	1	6.2059
Lomash_3	Niki_2_1	UN	0.298	0.5373	0.1647	0.4334	0.872219	1	6.9508
Lomash_4	Niki_2_1	UN	0.3081	0.5157	0.1761	0.434	0.872826	1	6.8387
Lomash_5	Niki_2_1	UN	0.3161	0.4988	0.1851	0.4345	0.873292	1	7.2034
Nadg_1	Niki_2_1	UN	0.3779	0.2152	0.407	0.5146	0.895922	1	6.589
Nadg_2	Niki_2_1	UN	0.3624	0.2379	0.3998	0.5187	0.896273	1	6.5405
Nadg_3	Niki_2_1	UN	0.3572	0.2516	0.3911	0.5169	0.895608	1	6.9
Nadg_4	Niki_2_1	UN	0.3985	0.2058	0.3958	0.4986	0.892875	1	6.4658
Nadg_5	Niki_2_1	UN	0.3894	0.2096	0.401	0.5058	0.894251	1	6.6761
Agl_1	Niki_2_1	UN	0.5692	0.1314	0.2994	0.3651	0.867176	1	4.7789
Agl_2	Niki_2_1	UN	0.5694	0.1294	0.3012	0.3659	0.867395	1	4.5876
Agl_3	Niki_2_1	UN	0.5667	0.1384	0.2948	0.364	0.866809	1	4.7872
Agl_4	Niki_2_1	UN	0.5952	0.1013	0.3035	0.3541	0.865596	1	4.1714
DelMad_1	Niki_2_1	UN	0.3036	0.3767	0.3197	0.508	0.891031	1	8.431
DelMad_2	Niki_2_1	UN	0.2836	0.4029	0.3135	0.5149	0.891866	1	7.7419
DelMad_3	Niki_2_1	UN	0.2468	0.4668	0.2864	0.5198	0.89146	1	9.4038
Niki_29_1	Niki_2_1	UN	1	0	0	0	0.786158	0.0002	1.4612
Niki_29_2	Niki_2_1	UN	1	0	0	0	0.785302	0.0002	1.4679
Niki_33_1	Niki_2_1	UN	1	0	0	0	0.795538	0.2332	1.873
Niki_33_2	Niki_2_1	UN	1	0	0	0	0.795543	0.1583	1.8281
Niki_35_1	Niki_2_1	UN	0.7251	0.1597	0.1153	0.1951	0.831769	0.9969	2.6214
Niki_35_2	Niki_2_1	UN	0.7046	0.1872	0.1082	0.2018	0.832532	0.9983	2.6739
Asco_2	Niki_2_1	UN	0.7325	0.0876	0.1799	0.2237	0.839211	0.9999	2.9203
Asco_4	Niki_2_1	UN	0.7696	0.2006	0.0298	0.1301	0.817572	0.9976	2.62
ChernRan_1	Niki_2_1	UN	0.731	0.269	0	0.1345	0.814116	0.9996	2.781
ChernRan_2	Niki_2_1	UN	0.6684	0.3316	0	0.1658	0.803463	0.9999	2.9389
ChernRan_3	Niki_2_1	UN	0.7208	0.2792	0	0.1396	0.808641	0.9998	2.8519
Guk_2	Niki_2_1	UN	0.8134	0	0.1866	0.1866	0.83348	0.9999	2.9219
Guk_4	Niki_2_1	UN	0.8011	0	0.1989	0.1989	0.832905	0.8897	2.25
Guk_5	Niki_2_1	UN	0.7941	0	0.2059	0.2059	0.83364	0.9909	2.5324
Ispan_1	Niki_2_1	UN	0.7531	0.1555	0.0915	0.1692	0.826561	0.9596	2.3897
Ispan_2	Niki_2_1	UN	0.755	0.1601	0.085	0.165	0.825599	0.9035	2.2778
Ispan_3	Niki_2_1	UN	0.4981	0.4385	0.0634	0.2827	0.843557	0.9876	2.6304
Kali_1	Niki_2_1	UN	0.7026	0.1702	0.1272	0.2123	0.835059	0.9877	2.4898
Kali_2	Niki_2_1	UN	0.7053	0.1295	0.1652	0.23	0.839565	0.9997	2.8088
Kali_3	Niki_2_1	UN	0.7258	0.1222	0.152	0.2131	0.836281	1	3.0231
Koker_1	Niki_2_1	UN	0.7894	0	0.2106	0.2106	0.833702	0.9881	2.5035
Koker_2	Niki_2_1	UN	0.7874	0	0.2126	0.2126	0.833391	0.9694	2.4041
Koker_3	Niki_2_1	UN	0.787	0	0.213	0.213	0.834063	0.9804	2.4514
Koker_4	Niki_2_1	UN	0.7916	0	0.2084	0.2084	0.832785	0.9896	2.5141
Kolh_2	Niki_2_1	UN	0.7727	0.1631	0.0642	0.1458	0.821594	0.9957	2.5971
Kolh_3	Niki_2_1	UN	0.7466	0.1639	0.0895	0.1714	0.826829	0.9893	2.5259
Nik_37_1	Niki_2_1	UN	1	0	0	0	0.771552	0	1.4292
Nik_37_2	Niki_2_1	UN	1	0	0	0	0.7633	0	1.2428
Nik_37_3	Niki_2_1	UN	1	0	0	0	0.767016	0	1.2603
Nisiot_1	Niki_2_1	UN	0.596	0.2721	0.1319	0.2679	0.844195	1	3.6607
Nisiot_2	Niki_2_1	UN	0.623	0.2283	0.1487	0.2629	0.844126	1	3.5526
Nisiot_3	Niki_2_1	UN	0.6356	0.21	0.1544	0.2594	0.84382	1	3.314
Nisiot_5	Niki_2_1	UN	0.6346	0.2158	0.1496	0.2575	0.843308	1	3.4741
Ofel_2	Niki_2_1	UN	0.7897	0.0732	0.1371	0.1737	0.829289	0.9945	2.5455
Ofel_3	Niki_2_1	UN	0.7655	0.0814	0.1531	0.1938	0.833218	0.9857	2.4534
Pian_1	Niki_2_1	UN	1	0	0	0	0.763327	0.2688	1.8901
Pian_2	Niki_2_1	UN	1	0	0	0	0.765103	0.4015	1.954
Pian_3	Niki_2_1	UN	1	0	0	0	0.761403	0.1326	1.8065
Pian_4	Niki_2_1	UN	1	0	0	0	0.760773	0.3676	1.9389
Pikv_1	Niki_2_1	UN	0.777	0.1563	0.0666	0.1448	0.821544	1	2.9416
Pikv_2	Niki_2_1	UN	0.7924	0.1842	0.0234	0.1155	0.814936	1	3.2093
Pikv_3	Niki_2_1	UN	0.8344	0.0866	0.079	0.1223	0.81847	1	3.1061
Pul_1	Niki_2_1	UN	0.8999	0.1001	0	0.0501	0.792467	0.6349	2.0663
Pul_3	Niki_2_1	UN	0.8696	0.1304	0	0.0652	0.793471	0.8406	2.1988
Pul_4	Niki_2_1	UN	1	0	0	0	0.767214	0.6204	2.0575
SanKat_1	Niki_2_1	UN	0.7908	0.0565	0.1527	0.181	0.831149	0.9971	2.6466
SanKat_2	Niki_2_1	UN	0.7373	0.1233	0.1394	0.2011	0.833792	0.9955	2.5985
SanKat_3	Niki_2_1	UN	0.7597	0.0662	0.1741	0.2072	0.836295	0.983	2.4653
Skoro_2	Niki_2_1	UN	1	0	0	0	0.779355	0.0036	1.5678
Skoro_3	Niki_2_1	UN	1	0	0	0	0.783004	0.0028	1.5594
Skoro_5	Niki_2_1	UN	1	0	0	0	0.798348	0.8297	2.1867
Tlem_1	Niki_2_1	UN	0.7205	0.1433	0.1362	0.2078	0.834732	1	3.4661
Tlem_2	Niki_2_1	UN	0.6844	0.1906	0.125	0.2203	0.836248	1	3.2823
Tlem_3	Niki_2_1	UN	0.6765	0.2022	0.1213	0.2224	0.836414	1	3.418
Tlem_4	Niki_2_1	UN	0.7103	0.1643	0.1254	0.2075	0.834207	1	3.32
Ubil_1	Niki_2_1	UN	0.6422	0.1106	0.2472	0.3025	0.85482	0.9998	2.874
Ubil_2	Niki_2_1	UN	0.672	0.0697	0.2584	0.2932	0.853822	0.9963	2.6176
VPec_4	Niki_2_1	UN	0.6273	0.2159	0.1568	0.2647	0.844784	1	3.1967
VPec_5	Niki_2_1	UN	0.6094	0.2434	0.1472	0.2689	0.845029	1	3.2627
VPec_1	Niki_2_1	UN	0.6358	0.3328	0.0314	0.1978	0.828516	1	3.2358
Karre_1	Niki_2_1	UN	0.8259	0.1741	0	0.087	0.776795	0.6119	2.0549
Karre_2	Niki_2_1	UN	1	0	0	0	0.756925	0.6452	2.071
Karre_4	Niki_2_1	UN	1	0	0	0	0.748617	0.2295	1.8689
Bidz_1	Niki_2_1	UN	0.6176	0.3396	0.0427	0.2126	0.831384	1	3.25
Bidz_2	Niki_2_1	UN	0.6221	0.3779	0	0.1889	0.823619	1	3.513
Bidz_3	Niki_2_1	UN	0.6556	0.3066	0.0377	0.191	0.827703	1	3.16
Kore_1	Niki_2_1	UN	1	0	0	0	0.780469	0.0958	1.7795
Kore_2	Niki_2_1	UN	1	0	0	0	0.77961	0.0276	1.6866
Kore_4	Niki_2_1	UN	1	0	0	0	0.762542	0.0023	1.5592
Lecc_1	Niki_2_1	UN	0.7041	0.1894	0.1064	0.2012	0.832355	1	3.9018
Lecc_2	Niki_2_1	UN	0.7031	0.2088	0.0881	0.1925	0.830163	1	3.8739
Lecc_3	Niki_2_1	UN	0.7213	0.1755	0.1032	0.191	0.830574	1	3.5333
Raco_1	Niki_2_1	UN	1	0	0	0	0.768275	0.0058	1.5961
Raco_2	Niki_2_1	UN	1	0	0	0	0.770521	0.0551	1.732
Raco_3	Niki_2_1	UN	1	0	0	0	0.767335	0.0442	1.7135
OldOli_10	Niki_2_1	UN	0.5052	0.2201	0.2747	0.3848	0.869253	1	5.0909
OldOli_11	Niki_2_1	UN	0.5148	0.1924	0.2929	0.389	0.870738	1	4.5938
OldOli_12	Niki_2_1	UN	0.4824	0.2527	0.2648	0.3912	0.869853	1	5.2209
OldOli_13	Niki_2_1	UN	0.4808	0.2287	0.2905	0.4049	0.873182	1	4.6316
OldOli_14	Niki_2_1	UN	0.4888	0.2294	0.2819	0.3965	0.871461	1	5.125
Niki_2_4	Niki_2_2	OT	0.0265	0.1591	0.8144	0.8939	0.974795	1	124
Niki_3	Niki_2_2	UN	0.4176	0.2212	0.3612	0.4718	0.88704	1	6.9265
Niki_4	Niki_2_2	UN	0.4447	0.2705	0.2848	0.42	0.875364	1	5.622
Tifli_1	Niki_2_2	UN	0.7453	0.153	0.1017	0.1782	0.828449	1	2.9493
Tifli_2	Niki_2_2	UN	0.7578	0.1181	0.1241	0.1831	0.830233	1	2.971
Tifli_4	Niki_2_2	UN	0.8436	0.109	0.0474	0.1019	0.81381	0.9999	2.8521
Bakin_1	Niki_2_2	UN	0.8267	0.0882	0.085	0.1292	0.819846	0.463	1.9829
Bakin_2	Niki_2_2	UN	0.8785	0.0083	0.1132	0.1174	0.819193	0.3321	1.9213
Bakin_3	Niki_2_2	UN	0.8602	0.0421	0.0977	0.1187	0.818727	0.5859	2.0409
KrymP_1	Niki_2_2	UN	0.6982	0.1137	0.1881	0.245	0.842986	1	3.0417
KrymP_2	Niki_2_2	UN	0.6671	0.1458	0.1871	0.26	0.845347	1	3.0984
KrymP_3	Niki_2_2	UN	0.5682	0.2754	0.1563	0.2941	0.849474	1	3.0862
Mishor_1	Niki_2_2	UN	0.4682	0.2437	0.2881	0.4099	0.873886	1	5.2558
Mishor_2	Niki_2_2	UN	0.4556	0.3065	0.2379	0.3912	0.868663	1	4.989
Mishor_3	Niki_2_2	UN	0.4501	0.2845	0.2654	0.4076	0.872512	1	5.4643
Nik_6_1	Niki_2_2	UN	0.2486	0.5311	0.2203	0.4859	0.883105	1	8.6786
Nik_6_3	Niki_2_2	UN	0.2661	0.5088	0.2251	0.4795	0.882281	1	7.4531
Niki_5_1	Niki_2_2	UN	0.2836	0.3993	0.3172	0.5168	0.892335	1	7.8
Niki_5_2	Niki_2_2	UN	0.2711	0.405	0.324	0.5265	0.894184	1	7.0746
Niki_5_3	Niki_2_2	UN	0.2747	0.4035	0.3218	0.5235	0.893617	1	7.8065
Niki_5_4	Niki_2_2	UN	0.2569	0.4102	0.3329	0.538	0.896435	1	8.7321
Obil_1	Niki_2_2	UN	0.6295	0.2989	0.0717	0.2211	0.83403	1	3.5259
Obil_3	Niki_2_2	UN	0.6343	0.3	0.0658	0.2157	0.832906	1	3.4649
Obil_4	Niki_2_2	UN	0.6388	0.3612	0	0.1806	0.815565	1	3.1508
Otur_1	Niki_2_2	UN	0.0288	0.0834	0.8878	0.9295	0.983742	1	123
Otur_3	Niki_2_2	UN	0.0265	0.0749	0.8986	0.9361	0.985269	1	102.667
Otur_4	Niki_2_2	UN	0.0166	0.0624	0.9211	0.9523	0.988857	1	156
Otur_5	Niki_2_2	UN	0.0176	0.0607	0.9216	0.952	0.988837	1	88.8571
Tavl_1	Niki_2_2	UN	0.7542	0.2442	0.0015	0.1237	0.81529	0.9998	2.8409
Tavl_2	Niki_2_2	UN	0.7114	0.2886	0	0.1443	0.814629	1	3.032
Tavl_3	Niki_2_2	UN	0.7018	0.2982	0	0.1491	0.815268	1	3.0813
Tavl_4	Niki_2_2	UN	0.7827	0.2071	0.0102	0.1138	0.814081	0.9999	2.9062
Tolg_1	Niki_2_2	UN	0.3654	0.3326	0.3019	0.4683	0.883864	1	7.5938
Tolg_2	Niki_2_2	UN	0.3663	0.3369	0.2968	0.4652	0.88315	1	7.7742
Tolg_3	Niki_2_2	UN	0.3971	0.2889	0.314	0.4585	0.88282	1	7.5469
Tolg_4	Niki_2_2	UN	0.3871	0.3038	0.309	0.4609	0.883001	1	7.1791
Tossi_1	Niki_2_2	UN	0.4296	0.3305	0.2399	0.4052	0.870998	1	6.7183
Tossi_2	Niki_2_2	UN	0.4613	0.3274	0.2113	0.375	0.864888	1	6.3067
Tossi_3	Niki_2_2	UN	0.438	0.3299	0.2321	0.397	0.869345	1	6.5068
Gorv_1	Niki_2_2	UN	0.439	0.1828	0.3782	0.4696	0.887436	1	5.9872
Gorv_2	Niki_2_2	UN	0.4345	0.1908	0.3747	0.4701	0.887366	1	5.775
Gorv_3	Niki_2_2	UN	0.4597	0.1666	0.3737	0.457	0.88521	1	5.3837
Gorv_5	Niki_2_2	UN	0.4725	0.1495	0.378	0.4527	0.884714	1	5.3882
Lomash_1	Niki_2_2	UN	0.2764	0.5659	0.1577	0.4407	0.873085	1	10.0455
Lomash_2	Niki_2_2	UN	0.2757	0.5701	0.1543	0.4393	0.87271	1	8.2642
Lomash_3	Niki_2_2	UN	0.2614	0.5891	0.1495	0.4441	0.87327	1	8.72
Lomash_4	Niki_2_2	UN	0.2692	0.5814	0.1494	0.4401	0.87263	1	8.1923
Lomash_5	Niki_2_2	UN	0.2794	0.5635	0.1571	0.4389	0.872769	1	8.3922
Nadg_1	Niki_2_2	UN	0.343	0.2564	0.4006	0.5288	0.897928	1	7.4545
Nadg_2	Niki_2_2	UN	0.3397	0.2642	0.396	0.5281	0.897622	1	7.0286
Nadg_3	Niki_2_2	UN	0.3358	0.2815	0.3827	0.5234	0.896282	1	7
Nadg_4	Niki_2_2	UN	0.3778	0.2337	0.3885	0.5054	0.893638	1	6.7606
Nadg_5	Niki_2_2	UN	0.3776	0.2241	0.3983	0.5103	0.89486	1	6.9429
Agl_1	Niki_2_2	UN	0.5306	0.1877	0.2816	0.3755	0.868069	1	5.3182
Agl_2	Niki_2_2	UN	0.5352	0.1825	0.2824	0.3736	0.8678	1	5.1222
Agl_3	Niki_2_2	UN	0.5369	0.1871	0.2759	0.3695	0.866853	1	5.2247
Agl_4	Niki_2_2	UN	0.5675	0.1454	0.2871	0.3598	0.865795	1	4.4851
DelMad_1	Niki_2_2	UN	0.2792	0.3944	0.3264	0.5236	0.893828	1	9.3962
DelMad_2	Niki_2_2	UN	0.2539	0.4243	0.3218	0.5339	0.895289	1	9.3208
DelMad_3	Niki_2_2	UN	0.2251	0.4725	0.3024	0.5387	0.895199	1	10.9565
Niki_29_1	Niki_2_2	UN	1	0	0	0	0.786504	0.0052	1.5942
Niki_29_2	Niki_2_2	UN	1	0	0	0	0.785068	0.0066	1.6049
Niki_33_1	Niki_2_2	UN	1	0	0	0	0.796178	0.3145	1.9149
Niki_33_2	Niki_2_2	UN	1	0	0	0	0.795719	0.3586	1.9358
Niki_35_1	Niki_2_2	UN	0.6918	0.2188	0.0894	0.1988	0.831228	0.9999	2.9225
Niki_35_2	Niki_2_2	UN	0.6738	0.2433	0.0829	0.2046	0.831865	0.9999	2.9457
Asco_2	Niki_2_2	UN	0.6937	0.1275	0.1788	0.2426	0.842192	1	3.2154
Asco_4	Niki_2_2	UN	0.7217	0.2658	0.0124	0.1454	0.819256	0.9999	2.9143
ChernRan_1	Niki_2_2	UN	0.6852	0.3148	0	0.1574	0.811456	1	3.1349
ChernRan_2	Niki_2_2	UN	0.6317	0.3683	0	0.1841	0.802263	1	3.3197
ChernRan_3	Niki_2_2	UN	0.6697	0.3303	0	0.1652	0.806655	1	3.126
Guk_2	Niki_2_2	UN	0.782	0.0381	0.1799	0.199	0.835237	1	3.3361
Guk_4	Niki_2_2	UN	0.8138	0	0.1862	0.1862	0.832957	0.996	2.6043
Guk_5	Niki_2_2	UN	0.813	0	0.187	0.187	0.833111	1	3
Ispan_1	Niki_2_2	UN	0.6783	0.2779	0.0438	0.1827	0.826638	0.999	2.7705
Ispan_2	Niki_2_2	UN	0.6888	0.2701	0.0411	0.1761	0.825458	0.9778	2.4493
Ispan_3	Niki_2_2	UN	0.4563	0.5226	0.0211	0.2824	0.84165	0.9989	2.9294
Kali_1	Niki_2_2	UN	0.6485	0.2486	0.1029	0.2272	0.836385	0.9998	2.8582
Kali_2	Niki_2_2	UN	0.6534	0.2036	0.143	0.2448	0.840974	1	3.1181
Kali_3	Niki_2_2	UN	0.6666	0.2078	0.1255	0.2294	0.837737	1	3.3833
Koker_1	Niki_2_2	UN	0.8107	0	0.1893	0.1893	0.832536	0.9999	2.9677
Koker_2	Niki_2_2	UN	0.8047	0	0.1953	0.1953	0.833041	0.9999	2.8976
Koker_3	Niki_2_2	UN	0.8059	0	0.1941	0.1941	0.833285	0.9997	2.845
Koker_4	Niki_2_2	UN	0.8078	0	0.1922	0.1922	0.832944	1	3.0081
Kolh_2	Niki_2_2	UN	0.7244	0.2484	0.0272	0.1514	0.820879	0.9999	2.9206
Kolh_3	Niki_2_2	UN	0.6943	0.2672	0.0385	0.1721	0.824702	0.9999	2.9256
Nik_37_1	Niki_2_2	UN	1	0	0	0	0.772195	0.0019	1.5556
Nik_37_2	Niki_2_2	UN	1	0	0	0	0.763763	0	1.3723
Nik_37_3	Niki_2_2	UN	1	0	0	0	0.767622	0	1.4141
Nisiot_1	Niki_2_2	UN	0.5805	0.2987	0.1208	0.2702	0.844072	1	4.3878
Nisiot_2	Niki_2_2	UN	0.5973	0.2681	0.1346	0.2687	0.844441	1	4.068
Nisiot_3	Niki_2_2	UN	0.6109	0.244	0.1451	0.2671	0.844646	1	4.0286
Nisiot_5	Niki_2_2	UN	0.6166	0.2416	0.1419	0.2627	0.843791	1	4.1667
Ofel_2	Niki_2_2	UN	0.7202	0.1664	0.1134	0.1966	0.831927	1	3.0148
Ofel_3	Niki_2_2	UN	0.7098	0.1572	0.133	0.2116	0.835207	0.9997	2.7823
Pian_1	Niki_2_2	UN	1	0	0	0	0.764552	0.6326	2.064
Pian_2	Niki_2_2	UN	1	0	0	0	0.764797	0.8465	2.2025
Pian_3	Niki_2_2	UN	1	0	0	0	0.762392	0.5245	2.0114
Pian_4	Niki_2_2	UN	1	0	0	0	0.762258	0.6987	2.0988
Pikv_1	Niki_2_2	UN	0.7191	0.2372	0.0437	0.1623	0.823356	1	3.2734
Pikv_2	Niki_2_2	UN	0.7499	0.2411	0.009	0.1295	0.81656	1	3.3651
Pikv_3	Niki_2_2	UN	0.7672	0.1766	0.0562	0.1445	0.821042	1	3.3228
Pul_1	Niki_2_2	UN	0.8219	0.1781	0	0.0891	0.792031	0.9094	2.2722
Pul_3	Niki_2_2	UN	0.7956	0.2044	0	0.1022	0.794184	0.9903	2.5033
Pul_4	Niki_2_2	UN	1	0	0	0	0.766533	0.6982	2.0983
SanKat_1	Niki_2_2	UN	0.7352	0.1414	0.1234	0.1941	0.831965	0.9984	2.697
SanKat_2	Niki_2_2	UN	0.6906	0.1906	0.1188	0.2141	0.834981	0.9997	2.8372
SanKat_3	Niki_2_2	UN	0.7096	0.1439	0.1465	0.2184	0.836893	0.9991	2.7388
Skoro_2	Niki_2_2	UN	1	0	0	0	0.781195	0.0329	1.6911
Skoro_3	Niki_2_2	UN	1	0	0	0	0.785854	0.0567	1.7316
Skoro_5	Niki_2_2	UN	0.969	0	0.031	0.031	0.799705	0.9879	2.4774
Tlem_1	Niki_2_2	UN	0.6819	0.1995	0.1187	0.2184	0.835662	1	3.5294
Tlem_2	Niki_2_2	UN	0.65	0.2444	0.1056	0.2278	0.836596	1	3.5726
Tlem_3	Niki_2_2	UN	0.6437	0.2464	0.1099	0.2331	0.83764	1	3.55
Tlem_4	Niki_2_2	UN	0.6475	0.2517	0.1008	0.2267	0.836201	1	3.6186
Ubil_1	Niki_2_2	UN	0.6141	0.1594	0.2265	0.3062	0.854518	1	3.123
Ubil_2	Niki_2_2	UN	0.6402	0.1295	0.2303	0.2951	0.852892	0.9999	2.9683
VPec_4	Niki_2_2	UN	0.6125	0.2471	0.1404	0.2639	0.843928	1	3.5804
VPec_5	Niki_2_2	UN	0.596	0.2713	0.1327	0.2684	0.844308	1	3.7757
VPec_1	Niki_2_2	UN	0.589	0.3969	0.0142	0.2126	0.830133	1	4.1881
Karre_1	Niki_2_2	UN	0.771	0.229	0	0.1145	0.777407	0.9139	2.2848
Karre_2	Niki_2_2	UN	1	0	0	0	0.756901	0.9279	2.2994
Karre_4	Niki_2_2	UN	1	0	0	0	0.749927	0.5246	2.0114
Bidz_1	Niki_2_2	UN	0.5985	0.3684	0.033	0.2172	0.831708	1	3.8273
Bidz_2	Niki_2_2	UN	0.5934	0.4066	0	0.2033	0.824041	1	4.2079
Bidz_3	Niki_2_2	UN	0.6198	0.3557	0.0245	0.2023	0.828934	1	3.9346
Kore_1	Niki_2_2	UN	1	0	0	0	0.782562	0.3816	1.9465
Kore_2	Niki_2_2	UN	1	0	0	0	0.782046	0.145	1.8196
Kore_4	Niki_2_2	UN	1	0	0	0	0.763803	0.0084	1.6202
Lecc_1	Niki_2_2	UN	0.6678	0.2268	0.1054	0.2188	0.835138	1	4.2642
Lecc_2	Niki_2_2	UN	0.659	0.2599	0.0811	0.211	0.832823	1	4.0826
Lecc_3	Niki_2_2	UN	0.6804	0.2237	0.0958	0.2077	0.832936	1	3.7739
Raco_1	Niki_2_2	UN	1	0	0	0	0.7691	0.0837	1.7656
Raco_2	Niki_2_2	UN	1	0	0	0	0.771796	0.187	1.8449
Raco_3	Niki_2_2	UN	1	0	0	0	0.769092	0.0987	1.7801
OldOli_10	Niki_2_2	UN	0.4714	0.2576	0.2711	0.3999	0.871517	1	5.3605
OldOli_11	Niki_2_2	UN	0.4877	0.2136	0.2987	0.4055	0.873641	1	4.8913
OldOli_12	Niki_2_2	UN	0.4533	0.2817	0.265	0.4058	0.872209	1	5.3647
OldOli_13	Niki_2_2	UN	0.4616	0.2498	0.2886	0.4135	0.874486	1	4.9231
OldOli_14	Niki_2_2	UN	0.4652	0.2492	0.2856	0.4102	0.873827	1	5.2759
Niki_3	Niki_2_4	UN	0.469	0.2616	0.2693	0.4001	0.871485	1	5.5488
Niki_4	Niki_2_4	UN	0.4947	0.1582	0.3471	0.4262	0.879093	1	5.881
Tifli_1	Niki_2_4	UN	0.8352	0.1284	0.0364	0.1006	0.813117	0.995	2.5556
Tifli_2	Niki_2_4	UN	0.8594	0.0807	0.0599	0.1003	0.814103	0.9934	2.529
Tifli_4	Niki_2_4	UN	0.8742	0	0.1258	0.1258	0.816418	1	3.15
Bakin_1	Niki_2_4	UN	0.9367	0	0.0633	0.0633	0.807133	0.1157	1.7947
Bakin_2	Niki_2_4	UN	0.9095	0	0.0905	0.0905	0.80777	0.0783	1.7592
Bakin_3	Niki_2_4	UN	0.9191	0	0.0809	0.0809	0.807191	0.1626	1.8289
KrymP_1	Niki_2_4	UN	0.791	0.0441	0.1649	0.187	0.832648	0.9985	2.7045
KrymP_2	Niki_2_4	UN	0.7735	0.0682	0.1583	0.1924	0.833227	0.9992	2.7519
KrymP_3	Niki_2_4	UN	0.6381	0.2544	0.1075	0.2347	0.837787	0.9995	2.8211
Mishor_1	Niki_2_4	UN	0.514	0.161	0.325	0.4055	0.874799	1	5.8902
Mishor_2	Niki_2_4	UN	0.509	0.1717	0.3193	0.4051	0.874489	1	5.9048
Mishor_3	Niki_2_4	UN	0.5067	0.1569	0.3364	0.4148	0.876797	1	6.012
Nik_6_1	Niki_2_4	UN	0.314	0.393	0.293	0.4895	0.886892	1	8.5333
Nik_6_3	Niki_2_4	UN	0.3525	0.3434	0.3041	0.4758	0.885167	1	7.5075
Niki_5_1	Niki_2_4	UN	0.3677	0.3581	0.2742	0.4532	0.880225	1	5.9342
Niki_5_2	Niki_2_4	UN	0.3346	0.3869	0.2785	0.4719	0.883425	1	5.859
Niki_5_3	Niki_2_4	UN	0.3465	0.3815	0.272	0.4628	0.881669	1	5.9359
Niki_5_4	Niki_2_4	UN	0.3299	0.3935	0.2766	0.4734	0.883574	1	6.1579
Obil_1	Niki_2_4	UN	0.7228	0.264	0.0132	0.1452	0.819271	1	2.9478
Obil_3	Niki_2_4	UN	0.7076	0.2885	0.0039	0.1482	0.81933	0.9999	2.9538
Obil_4	Niki_2_4	UN	0.751	0.2026	0.0464	0.1477	0.821117	1	3.7917
Otur_3	Niki_2_4	UN	0.0309	0.1539	0.8152	0.8922	0.974546	1	67.8889
Otur_4	Niki_2_4	UN	0.0232	0.1387	0.8381	0.9075	0.978012	1	88.2857
Otur_1	Niki_2_4	UN	0.0266	0.171	0.8024	0.8879	0.973303	1	101.833
Otur_5	Niki_2_4	UN	0.0276	0.1398	0.8326	0.9025	0.976976	1	88.2857
Tavl_1	Niki_2_4	UN	0.8253	0.1747	0	0.0873	0.804094	0.9943	2.5714
Tavl_2	Niki_2_4	UN	0.779	0.221	0	0.1105	0.802425	0.9975	2.6449
Tavl_3	Niki_2_4	UN	0.7625	0.2375	0	0.1188	0.803685	0.9984	2.6889
Tavl_4	Niki_2_4	UN	0.865	0.135	0	0.0675	0.802954	0.9939	2.5683
Tolg_1	Niki_2_4	UN	0.4563	0.293	0.2507	0.3972	0.8702	1	6.1842
Tolg_2	Niki_2_4	UN	0.4648	0.2875	0.2476	0.3914	0.869128	1	6.1842
Tolg_3	Niki_2_4	UN	0.489	0.2437	0.2673	0.3892	0.869634	1	6.1579
Tolg_4	Niki_2_4	UN	0.4856	0.2455	0.2689	0.3916	0.870101	1	5.9744
Tossi_1	Niki_2_4	UN	0.5061	0.1847	0.3092	0.4015	0.873462	1	6.2222
Tossi_2	Niki_2_4	UN	0.5268	0.1492	0.324	0.3986	0.873639	1	6.7273
Tossi_3	Niki_2_4	UN	0.5068	0.1712	0.3221	0.4076	0.875012	1	6.7013
Gorv_1	Niki_2_4	UN	0.5155	0.1724	0.3121	0.3983	0.873082	1	5.1705
Gorv_2	Niki_2_4	UN	0.4888	0.2072	0.304	0.4076	0.874205	1	4.828
Gorv_3	Niki_2_4	UN	0.5186	0.1695	0.3119	0.3966	0.872798	1	4.7872
Gorv_5	Niki_2_4	UN	0.5148	0.1644	0.3209	0.4031	0.874222	1	4.828
Lomash_1	Niki_2_4	UN	0.3197	0.5898	0.0905	0.3854	0.861242	1	8.0185
Lomash_2	Niki_2_4	UN	0.3124	0.6026	0.085	0.3863	0.861144	1	6.8871
Lomash_3	Niki_2_4	UN	0.2948	0.6322	0.0729	0.3891	0.861065	1	7.0833
Lomash_4	Niki_2_4	UN	0.3104	0.5998	0.0898	0.3897	0.861909	1	6.5
Lomash_5	Niki_2_4	UN	0.3139	0.5935	0.0926	0.3893	0.861975	1	7.1186
Nadg_1	Niki_2_4	UN	0.437	0.217	0.346	0.4545	0.883583	1	5.9136
Nadg_2	Niki_2_4	UN	0.4228	0.2272	0.3501	0.4637	0.885241	1	5.7143
Nadg_3	Niki_2_4	UN	0.4068	0.272	0.3212	0.4572	0.882934	1	5.9625
Nadg_4	Niki_2_4	UN	0.4499	0.1948	0.3554	0.4528	0.883723	1	5.7073
Nadg_5	Niki_2_4	UN	0.4565	0.1891	0.3544	0.4489	0.883063	1	5.8148
Agl_1	Niki_2_4	UN	0.6328	0.1374	0.2298	0.2985	0.853426	1	4.6061
Agl_2	Niki_2_4	UN	0.634	0.1364	0.2296	0.2978	0.853301	1	4.6495
Agl_3	Niki_2_4	UN	0.6293	0.1565	0.2143	0.2925	0.851774	1	4.5
Agl_4	Niki_2_4	UN	0.673	0.067	0.26	0.2935	0.85395	1	4.055
DelMad_1	Niki_2_4	UN	0.3468	0.3869	0.2663	0.4597	0.880928	1	7.2239
DelMad_2	Niki_2_4	UN	0.3358	0.3933	0.2709	0.4676	0.882387	1	7.0588
DelMad_3	Niki_2_4	UN	0.3047	0.4517	0.2436	0.4694	0.881484	1	7.7302
Niki_29_1	Niki_2_4	UN	1	0	0	0	0.773239	0.0003	1.4747
Niki_29_2	Niki_2_4	UN	1	0	0	0	0.773072	0.0003	1.4747
Niki_33_1	Niki_2_4	UN	1	0	0	0	0.785634	0.1745	1.8394
Niki_33_2	Niki_2_4	UN	1	0	0	0	0.784465	0.1253	1.8051
Niki_35_1	Niki_2_4	UN	0.7444	0.2216	0.034	0.1448	0.820105	0.9981	2.6667
Niki_35_2	Niki_2_4	UN	0.7351	0.242	0.0229	0.1439	0.819475	0.9962	2.6028
Asco_2	Niki_2_4	UN	0.7883	0.0965	0.1153	0.1635	0.826693	0.9994	2.7297
Asco_4	Niki_2_4	UN	0.8217	0.0497	0.1285	0.1534	0.825653	1	3.6484
ChernRan_1	Niki_2_4	UN	0.8354	0.1364	0.0281	0.0963	0.812071	1	3.4206
ChernRan_2	Niki_2_4	UN	0.8436	0.1466	0.0098	0.0831	0.809142	1	3.9391
ChernRan_3	Niki_2_4	UN	0.8494	0.1333	0.0173	0.0839	0.809597	1	3.8362
Guk_2	Niki_2_4	UN	0.8621	0.0051	0.1328	0.1354	0.822943	1	3.0156
Guk_4	Niki_2_4	UN	0.863	0	0.137	0.137	0.820683	0.9113	2.2774
Guk_5	Niki_2_4	UN	0.8581	0	0.1419	0.1419	0.82143	0.9965	2.6204
Ispan_1	Niki_2_4	UN	0.8	0.1784	0.0217	0.1108	0.814112	0.8872	2.2587
Ispan_2	Niki_2_4	UN	0.812	0.1703	0.0176	0.1028	0.812644	0.9074	2.2808
Ispan_3	Niki_2_4	UN	0.5474	0.4526	0	0.2263	0.82906	0.9704	2.5104
Kali_1	Niki_2_4	UN	0.7565	0.181	0.0625	0.153	0.822688	0.8737	2.2284
Kali_2	Niki_2_4	UN	0.7649	0.1341	0.101	0.168	0.826791	0.9935	2.54
Kali_3	Niki_2_4	UN	0.7669	0.1519	0.0812	0.1572	0.824179	0.9996	2.773
Koker_1	Niki_2_4	UN	0.8559	0	0.1441	0.1441	0.821015	0.9983	2.6866
Koker_2	Niki_2_4	UN	0.8444	0	0.1556	0.1556	0.821997	0.9926	2.5461
Koker_3	Niki_2_4	UN	0.8449	0	0.1551	0.1551	0.822407	0.9933	2.5571
Koker_4	Niki_2_4	UN	0.8541	0	0.1459	0.1459	0.820844	0.9987	2.7037
Kolh_2	Niki_2_4	UN	0.7762	0.2238	0	0.1119	0.808087	0.9845	2.4755
Kolh_3	Niki_2_4	UN	0.7554	0.2446	0	0.1223	0.813437	0.9963	2.6288
Nik_37_1	Niki_2_4	UN	1	0	0	0	0.77673	0.5806	2.0359
Nik_37_2	Niki_2_4	UN	1	0	0	0	0.770389	0.6683	2.0777
Nik_37_3	Niki_2_4	UN	1	0	0	0	0.773609	0.6578	2.0725
Nisiot_1	Niki_2_4	UN	0.6615	0.2749	0.0636	0.2011	0.830459	1	3.7909
Nisiot_2	Niki_2_4	UN	0.6728	0.2543	0.0729	0.2001	0.8307	1	3.7778
Nisiot_3	Niki_2_4	UN	0.6919	0.2203	0.0878	0.198	0.831019	1	3.5391
Nisiot_5	Niki_2_4	UN	0.6854	0.2309	0.0837	0.1992	0.831035	1	3.6429
Ofel_2	Niki_2_4	UN	0.7999	0.1348	0.0653	0.1327	0.819541	0.999	2.6939
Ofel_3	Niki_2_4	UN	0.7825	0.1294	0.0881	0.1528	0.823772	0.9962	2.5705
Pian_1	Niki_2_4	UN	1	0	0	0	0.753273	0.0451	1.7165
Pian_2	Niki_2_4	UN	1	0	0	0	0.753884	0.1454	1.8152
Pian_3	Niki_2_4	UN	1	0	0	0	0.750465	0.0305	1.6904
Pian_4	Niki_2_4	UN	1	0	0	0	0.750158	0.1416	1.8148
Pikv_1	Niki_2_4	UN	0.7927	0.1072	0.1	0.1536	0.824439	1	4.3925
Pikv_2	Niki_2_4	UN	0.8224	0.0748	0.1028	0.1402	0.822401	1	4.8137
Pikv_3	Niki_2_4	UN	0.8475	0.0087	0.1438	0.1481	0.825478	1	4.4167
Pul_1	Niki_2_4	UN	0.8712	0.1288	0	0.0644	0.780595	0.5862	2.0412
Pul_3	Niki_2_4	UN	0.8691	0.1309	0	0.0654	0.780897	0.7227	2.1145
Pul_4	Niki_2_4	UN	1	0	0	0	0.771785	0.9994	2.7051
SanKat_1	Niki_2_4	UN	0.8263	0.1044	0.0693	0.1215	0.81793	0.8536	2.2157
SanKat_2	Niki_2_4	UN	0.8012	0.1202	0.0786	0.1387	0.821094	0.939	2.3245
SanKat_3	Niki_2_4	UN	0.8205	0.0714	0.1081	0.1438	0.823218	0.9071	2.2727
Skoro_2	Niki_2_4	UN	1	0	0	0	0.788017	0.9987	2.6497
Skoro_3	Niki_2_4	UN	1	0	0	0	0.790398	0.9911	2.4908
Skoro_5	Niki_2_4	UN	1	0	0	0	0.798778	0.9994	2.7078
Tlem_1	Niki_2_4	UN	0.7604	0.1725	0.0671	0.1534	0.822942	1	3.296
Tlem_2	Niki_2_4	UN	0.7222	0.2185	0.0593	0.1685	0.825036	1	3.4874
Tlem_3	Niki_2_4	UN	0.7283	0.2183	0.0534	0.1626	0.823822	1	3.2778
Tlem_4	Niki_2_4	UN	0.7364	0.2112	0.0525	0.158	0.823053	1	3.3577
Ubil_1	Niki_2_4	UN	0.713	0.0941	0.1929	0.2399	0.842386	0.9978	2.6618
Ubil_2	Niki_2_4	UN	0.7328	0.069	0.1982	0.2327	0.841459	0.9858	2.4859
VPec_4	Niki_2_4	UN	0.6866	0.222	0.0914	0.2024	0.831884	1	3.121
VPec_5	Niki_2_4	UN	0.665	0.264	0.071	0.203	0.831089	1	3.3419
VPec_1	Niki_2_4	UN	0.6778	0.2378	0.0844	0.2033	0.83172	1	4.9053
Karre_1	Niki_2_4	UN	1	0	0	0	0.76489	0.3763	1.9415
Karre_2	Niki_2_4	UN	1	0	0	0	0.758869	0.9902	2.4875
Karre_4	Niki_2_4	UN	1	0	0	0	0.754839	0.9864	2.4491
Bidz_1	Niki_2_4	UN	0.6744	0.2361	0.0895	0.2076	0.832642	1	4.5243
Bidz_2	Niki_2_4	UN	0.6838	0.238	0.0782	0.1972	0.830482	1	4.9688
Bidz_3	Niki_2_4	UN	0.7207	0.1567	0.1227	0.201	0.833042	1	4.6733
Kore_1	Niki_2_4	UN	1	0	0	0	0.769167	0.1196	1.801
Kore_2	Niki_2_4	UN	1	0	0	0	0.769294	0.0149	1.6522
Kore_4	Niki_2_4	UN	1	0	0	0	0.768657	0.7668	2.133
Lecc_1	Niki_2_4	UN	0.7478	0.2056	0.0465	0.1493	0.821394	1	3.8435
Lecc_2	Niki_2_4	UN	0.7524	0.2219	0.0257	0.1367	0.818445	1	3.6555
Lecc_3	Niki_2_4	UN	0.7616	0.1898	0.0486	0.1435	0.820543	1	3.4355
Raco_1	Niki_2_4	UN	1	0	0	0	0.757388	0.0005	1.493
Raco_2	Niki_2_4	UN	1	0	0	0	0.759089	0.002	1.5524
Raco_3	Niki_2_4	UN	1	0	0	0	0.756315	0.0078	1.6127
OldOli_10	Niki_2_4	UN	0.5283	0.1241	0.3476	0.4097	0.876459	1	5.7701
OldOli_11	Niki_2_4	UN	0.562	0.0379	0.4002	0.4191	0.880289	1	5.5056
OldOli_12	Niki_2_4	UN	0.5156	0.1388	0.3456	0.415	0.877233	1	6.4615
OldOli_13	Niki_2_4	UN	0.5153	0.1366	0.3481	0.4164	0.877565	1	5.2935
OldOli_14	Niki_2_4	UN	0.5219	0.1151	0.3631	0.4206	0.878898	1	6.0241
Niki_4	Niki_3	OT	0.0156	0.2192	0.7653	0.8749	0.969569	1	195.333
Tifli_1	Niki_3	UN	0.7472	0.1524	0.1004	0.1766	0.828143	0.9953	2.5804
Tifli_2	Niki_3	UN	0.7673	0.1261	0.1065	0.1696	0.827289	0.995	2.5724
Tifli_4	Niki_3	UN	0.8639	0.1019	0.0342	0.0852	0.810541	0.9933	2.5405
Bakin_1	Niki_3	UN	0.8277	0.052	0.1203	0.1463	0.82416	0.4752	1.9884
Bakin_2	Niki_3	UN	0.8567	0	0.1433	0.1433	0.823747	0.1124	1.7892
Bakin_3	Niki_3	UN	0.8516	0.0191	0.1293	0.1389	0.823352	0.3203	1.9153
KrymP_1	Niki_3	UN	0.4017	0.4032	0.1951	0.3967	0.867671	1	4.3647
KrymP_2	Niki_3	UN	0.3454	0.465	0.1896	0.4221	0.87151	1	5.3243
KrymP_3	Niki_3	UN	0.2808	0.5388	0.1804	0.4498	0.875548	1	5.8906
Mishor_1	Niki_3	UN	0.0245	0.2273	0.7482	0.8618	0.966729	1	146.25
Mishor_2	Niki_3	UN	0.0167	0.2597	0.7236	0.8534	0.964291	1	196.667
Mishor_3	Niki_3	UN	0.02	0.2318	0.7482	0.8641	0.967087	1	146.25
Nik_6_1	Niki_3	UN	0.406	0.3768	0.2172	0.4056	0.870063	1	5.7089
Nik_6_3	Niki_3	UN	0.427	0.3572	0.2158	0.3944	0.868213	1	5.7692
Niki_5_1	Niki_3	UN	0.4683	0.2142	0.3174	0.4246	0.877525	1	5.0361
Niki_5_2	Niki_3	UN	0.4273	0.2643	0.3084	0.4405	0.879694	1	5.3902
Niki_5_3	Niki_3	UN	0.425	0.2765	0.2985	0.4368	0.878654	1	5.5375
Niki_5_4	Niki_3	UN	0.4241	0.2564	0.3195	0.4477	0.881337	1	5.65
Obil_1	Niki_3	UN	0.8218	0.0412	0.137	0.1576	0.826696	0.9984	2.669
Obil_3	Niki_3	UN	0.7792	0.1053	0.1155	0.1682	0.827454	0.9985	2.6786
Obil_4	Niki_3	UN	0.8861	0.0871	0.0268	0.0704	0.807841	0.9869	2.4768
Otur_1	Niki_3	UN	0.4512	0.2181	0.3306	0.4397	0.880539	1	5.5
Otur_3	Niki_3	UN	0.43	0.2437	0.3263	0.4482	0.881709	1	6.2329
Otur_4	Niki_3	UN	0.4445	0.212	0.3435	0.4495	0.882671	1	6.1333
Otur_5	Niki_3	UN	0.4433	0.2102	0.3465	0.4516	0.883157	1	5.987
Tavl_1	Niki_3	UN	0.5757	0.4183	0.0059	0.2151	0.830171	1	3.1552
Tavl_2	Niki_3	UN	0.5762	0.4238	0	0.2119	0.829185	1	3.3604
Tavl_3	Niki_3	UN	0.5697	0.4205	0.0098	0.22	0.831134	1	3.3482
Tavl_4	Niki_3	UN	0.6189	0.3553	0.0258	0.2035	0.829179	1	3.0417
Tolg_1	Niki_3	UN	0.4702	0.1896	0.3402	0.435	0.880202	1	4.989
Tolg_2	Niki_3	UN	0.4788	0.1829	0.3382	0.4297	0.879265	1	4.9239
Tolg_3	Niki_3	UN	0.4842	0.1647	0.3511	0.4334	0.88043	1	4.967
Tolg_4	Niki_3	UN	0.4986	0.1462	0.3551	0.4282	0.879776	1	4.5714
Tossi_1	Niki_3	UN	0.4604	0.3089	0.2308	0.3852	0.867392	1	5.2941
Tossi_2	Niki_3	UN	0.5001	0.2963	0.2036	0.3518	0.860827	1	5.1034
Tossi_3	Niki_3	UN	0.5033	0.2642	0.2326	0.3647	0.864167	1	5.0111
Gorv_1	Niki_3	UN	0.01	0.1313	0.8587	0.9243	0.981628	1	196.667
Gorv_2	Niki_3	UN	0.0133	0.1205	0.8662	0.9264	0.982293	1	295
Gorv_3	Niki_3	UN	0.0156	0.1425	0.8419	0.9132	0.979097	1	146.25
Gorv_5	Niki_3	UN	0.0322	0.133	0.8348	0.9013	0.976868	1	116.4
Lomash_1	Niki_3	UN	0.2661	0.5793	0.1546	0.4443	0.873531	1	8.0784
Lomash_2	Niki_3	UN	0.2675	0.5865	0.1459	0.4392	0.872333	1	8.12
Lomash_3	Niki_3	UN	0.2811	0.5675	0.1514	0.4352	0.871927	1	8.14
Lomash_4	Niki_3	UN	0.2945	0.5571	0.1484	0.4269	0.870472	1	7.3889
Lomash_5	Niki_3	UN	0.2958	0.5499	0.1543	0.4292	0.871102	1	7.566
Nadg_1	Niki_3	UN	0.2932	0.2586	0.4482	0.5775	0.907847	1	8.4138
Nadg_2	Niki_3	UN	0.2921	0.2605	0.4474	0.5776	0.907834	1	8.1333
Nadg_3	Niki_3	UN	0.2903	0.2653	0.4443	0.577	0.9076	1	7.9344
Nadg_4	Niki_3	UN	0.3226	0.2325	0.4449	0.5612	0.905085	1	7.7705
Nadg_5	Niki_3	UN	0.3044	0.2639	0.4317	0.5636	0.904896	1	7.2923
Agl_1	Niki_3	UN	0.6478	0.0849	0.2673	0.3098	0.856881	1	4.1863
Agl_2	Niki_3	UN	0.6724	0.0572	0.2704	0.299	0.855285	1	3.9074
Agl_3	Niki_3	UN	0.6655	0.0657	0.2688	0.3017	0.85564	1	3.7658
Agl_4	Niki_3	UN	0.7079	0	0.2921	0.2921	0.854927	1	3.3636
DelMad_1	Niki_3	UN	0.4067	0.2832	0.3101	0.4517	0.881564	1	6.039
DelMad_2	Niki_3	UN	0.3801	0.3087	0.3112	0.4656	0.883839	1	6.411
DelMad_3	Niki_3	UN	0.3544	0.3732	0.2724	0.459	0.881085	1	6.5571
Niki_29_1	Niki_3	UN	1	0	0	0	0.782386	0	1.2833
Niki_29_2	Niki_3	UN	1	0	0	0	0.783033	0	1.2773
Niki_33_1	Niki_3	UN	1	0	0	0	0.796068	0.0228	1.6717
Niki_33_2	Niki_3	UN	1	0	0	0	0.7959	0.0031	1.568
Niki_35_1	Niki_3	UN	0.8238	0.1273	0.0489	0.1126	0.815588	0.6817	2.092
Niki_35_2	Niki_3	UN	0.8088	0.1483	0.043	0.1171	0.816056	0.8123	2.1783
Asco_2	Niki_3	UN	0.7507	0.1125	0.1368	0.1931	0.832386	0.9996	2.781
Asco_4	Niki_3	UN	0.7537	0.2463	0	0.1232	0.808694	0.9919	2.531
ChernRan_1	Niki_3	UN	0.8799	0.1133	0.0067	0.0634	0.805839	0.8932	2.2516
ChernRan_2	Niki_3	UN	0.831	0.169	0	0.0845	0.796388	0.8241	2.184
ChernRan_3	Niki_3	UN	0.8767	0.1233	0	0.0616	0.800962	0.7322	2.1198
Guk_2	Niki_3	UN	0.7785	0.0398	0.1817	0.2016	0.835739	0.9955	2.5887
Guk_4	Niki_3	UN	0.8067	0	0.1933	0.1933	0.834915	0.7738	2.1481
Guk_5	Niki_3	UN	0.8015	0	0.1985	0.1985	0.833018	0.7268	2.1195
Ispan_1	Niki_3	UN	0.6017	0.3983	0	0.1991	0.825998	0.885	2.2692
Ispan_2	Niki_3	UN	0.6136	0.3864	0	0.1932	0.823127	0.9855	2.5159
Ispan_3	Niki_3	UN	0.4464	0.544	0.0096	0.2816	0.841023	0.9831	2.6
Kali_1	Niki_3	UN	0.6042	0.2775	0.1183	0.257	0.841853	0.9998	2.8769
Kali_2	Niki_3	UN	0.6138	0.2552	0.131	0.2586	0.842659	0.9993	2.771
Kali_3	Niki_3	UN	0.6257	0.2545	0.1198	0.247	0.84031	0.9999	2.9609
Koker_1	Niki_3	UN	0.8092	0	0.1908	0.1908	0.831105	0.8145	2.1818
Koker_2	Niki_3	UN	0.8033	0	0.1967	0.1967	0.832376	0.8986	2.2649
Koker_3	Niki_3	UN	0.8044	0	0.1956	0.1956	0.832449	0.9231	2.298
Koker_4	Niki_3	UN	0.8049	0	0.1951	0.1951	0.831544	0.9173	2.2876
Kolh_2	Niki_3	UN	0.8083	0.0823	0.1094	0.1505	0.824351	0.9757	2.4306
Kolh_3	Niki_3	UN	0.7741	0.1256	0.1003	0.1631	0.825961	0.9067	2.2789
Nik_37_1	Niki_3	UN	1	0	0	0	0.763609	0	1.1133
Nik_37_2	Niki_3	UN	1	0	0	0	0.755358	0	1.034
Nik_37_3	Niki_3	UN	1	0	0	0	0.758792	0	1.0534
Nisiot_1	Niki_3	UN	0.6189	0.2818	0.0992	0.2402	0.838304	1	3.5463
Nisiot_2	Niki_3	UN	0.6359	0.247	0.1171	0.2406	0.839162	1	3.4018
Nisiot_3	Niki_3	UN	0.6418	0.2405	0.1177	0.238	0.838764	1	3.5556
Nisiot_5	Niki_3	UN	0.6397	0.2399	0.1204	0.2404	0.83927	1	3.4862
Ofel_2	Niki_3	UN	0.7386	0.1086	0.1528	0.2071	0.835342	0.9824	2.4503
Ofel_3	Niki_3	UN	0.7492	0.0816	0.1692	0.21	0.836539	0.9555	2.3526
Pian_1	Niki_3	UN	1	0	0	0	0.770536	0.0337	1.6943
Pian_2	Niki_3	UN	0.8171	0.1829	0	0.0914	0.770819	0.0113	1.6256
Pian_3	Niki_3	UN	1	0	0	0	0.767982	0.0034	1.5672
Pian_4	Niki_3	UN	1	0	0	0	0.768519	0.0298	1.6872
Pikv_1	Niki_3	UN	0.7608	0.1821	0.0571	0.1481	0.82166	1	3.031
Pikv_2	Niki_3	UN	0.8085	0.1595	0.032	0.1117	0.814714	1	2.9699
Pikv_3	Niki_3	UN	0.7948	0.1401	0.0651	0.1352	0.819936	0.9999	2.8955
Pul_1	Niki_3	UN	0.887	0.113	0	0.0565	0.785762	0.5254	2.0122
Pul_3	Niki_3	UN	0.8642	0.1358	0	0.0679	0.790507	0.7274	2.1203
Pul_4	Niki_3	UN	1	0	0	0	0.757601	0.0412	1.7083
SanKat_1	Niki_3	UN	0.692	0.1474	0.1606	0.2343	0.840057	0.9993	2.7692
SanKat_2	Niki_3	UN	0.6528	0.1882	0.159	0.2531	0.843011	0.9999	2.9836
SanKat_3	Niki_3	UN	0.6939	0.1096	0.1965	0.2513	0.844367	0.9999	2.9444
Skoro_2	Niki_3	UN	1	0	0	0	0.788155	0.0004	1.4804
Skoro_3	Niki_3	UN	1	0	0	0	0.793181	0.0005	1.4878
Skoro_5	Niki_3	UN	0.9017	0.0891	0.0092	0.0537	0.804389	0.4508	1.9773
Tlem_1	Niki_3	UN	0.819	0.0145	0.1665	0.1738	0.830602	0.9573	2.3544
Tlem_2	Niki_3	UN	0.7798	0.0681	0.1522	0.1862	0.83196	0.9707	2.3987
Tlem_3	Niki_3	UN	0.7639	0.0919	0.1442	0.1901	0.832239	0.9858	2.4615
Tlem_4	Niki_3	UN	0.7921	0.0533	0.1547	0.1813	0.831286	0.9366	2.3086
Ubil_1	Niki_3	UN	0.7944	0	0.2056	0.2056	0.830727	0.4494	1.9759
Ubil_2	Niki_3	UN	0.7947	0	0.2053	0.2053	0.829467	0.162	1.8229
VPec_4	Niki_3	UN	0.6381	0.2449	0.1169	0.2394	0.83896	1	3.0847
VPec_5	Niki_3	UN	0.6149	0.2871	0.0981	0.2416	0.838481	1	3.1026
VPec_1	Niki_3	UN	0.6297	0.3669	0.0034	0.1868	0.825518	1	3.313
Karre_1	Niki_3	UN	0.6914	0.3086	0	0.1543	0.782665	0.2024	1.848
Karre_2	Niki_3	UN	0.7442	0.2558	0	0.1279	0.762059	0.0992	1.776
Karre_4	Niki_3	UN	1	0	0	0	0.755713	0.0026	1.5567
Bidz_1	Niki_3	UN	0.5978	0.4022	0	0.2011	0.827228	1	3.7184
Bidz_2	Niki_3	UN	0.6087	0.3913	0	0.1956	0.819095	1	3.3333
Bidz_3	Niki_3	UN	0.643	0.357	0	0.1785	0.823139	1	3.4324
Kore_1	Niki_3	UN	1	0	0	0	0.784222	0.0031	1.5748
Kore_2	Niki_3	UN	1	0	0	0	0.78272	0	1.4292
Kore_4	Niki_3	UN	1	0	0	0	0.763	0	1.3178
Lecc_1	Niki_3	UN	0.6835	0.2187	0.0978	0.2072	0.832942	1	3.4706
Lecc_2	Niki_3	UN	0.6813	0.222	0.0967	0.2077	0.832982	1	3.2823
Lecc_3	Niki_3	UN	0.6829	0.2203	0.0969	0.207	0.832868	1	3.1654
Raco_1	Niki_3	UN	1	0	0	0	0.775181	0.0002	1.4623
Raco_2	Niki_3	UN	1	0	0	0	0.777692	0.0013	1.5291
Raco_3	Niki_3	UN	1	0	0	0	0.774791	0.0006	1.4976
OldOli_10	Niki_3	UN	0.0335	0.2281	0.7384	0.8525	0.964793	1	117.2
OldOli_11	Niki_3	UN	0.0111	0.2461	0.7428	0.8658	0.967131	1	291.5
OldOli_12	Niki_3	UN	0.0089	0.2485	0.7426	0.8668	0.967282	1	291
OldOli_13	Niki_3	UN	0.0168	0.2377	0.7455	0.8644	0.967015	1	194.333
OldOli_14	Niki_3	UN	0.0189	0.2291	0.752	0.8665	0.967647	1	291
Tifli_1	Niki_4	UN	0.7925	0.1766	0.0309	0.1192	0.815867	0.9737	2.4133
Tifli_2	Niki_4	UN	0.8081	0.1653	0.0266	0.1092	0.814075	0.8993	2.2595
Tifli_4	Niki_4	UN	0.8964	0	0.1036	0.1036	0.815563	1	3.0145
Bakin_1	Niki_4	UN	0.8593	0.0812	0.0595	0.1001	0.814046	0.5619	2.0294
Bakin_2	Niki_4	UN	0.9089	0.002	0.0891	0.0901	0.813747	0.2101	1.8571
Bakin_3	Niki_4	UN	0.8885	0.0341	0.0774	0.0944	0.813926	0.4753	1.9885
KrymP_1	Niki_4	UN	0.4082	0.4835	0.1083	0.3501	0.856363	1	4.5926
KrymP_2	Niki_4	UN	0.3532	0.5441	0.1027	0.3747	0.860074	1	5.4306
KrymP_3	Niki_4	UN	0.2699	0.6311	0.099	0.4145	0.866299	1	6.25
Mishor_1	Niki_4	UN	0.0188	0.1461	0.835	0.9081	0.977979	1	121.6
Mishor_2	Niki_4	UN	0.0111	0.1372	0.8517	0.9203	0.980678	1	124.6
Mishor_3	Niki_4	UN	0.0188	0.1158	0.8655	0.9234	0.981767	1	124.2
Nik_6_1	Niki_4	UN	0.4321	0.2808	0.2871	0.4275	0.876665	1	6.9859
Nik_6_3	Niki_4	UN	0.4529	0.2559	0.2912	0.4192	0.875504	1	6.9444
Niki_5_1	Niki_4	UN	0.4719	0.2806	0.2475	0.3878	0.86855	1	5.4805
Niki_5_2	Niki_4	UN	0.4345	0.3141	0.2514	0.4084	0.87203	1	5.4074
Niki_5_3	Niki_4	UN	0.4223	0.3397	0.238	0.4078	0.871344	1	5.4625
Niki_5_4	Niki_4	UN	0.4379	0.3023	0.2598	0.411	0.87281	1	5.6
Obil_1	Niki_4	UN	0.8332	0.1266	0.0402	0.1035	0.813749	0.9967	2.6127
Obil_3	Niki_4	UN	0.8038	0.1718	0.0244	0.1103	0.814146	0.9956	2.5874
Obil_4	Niki_4	UN	0.908	0.0025	0.0894	0.0907	0.813861	1	3.4462
Otur_1	Niki_4	UN	0.4815	0.2296	0.2889	0.4037	0.872918	1	5.2209
Otur_3	Niki_4	UN	0.4702	0.2449	0.2848	0.4073	0.873318	1	5.5
Otur_4	Niki_4	UN	0.466	0.2441	0.2899	0.412	0.874296	1	5.4048
Otur_5	Niki_4	UN	0.468	0.2351	0.2969	0.4145	0.875	1	5.3412
Tavl_1	Niki_4	UN	0.5126	0.4874	0	0.2437	0.822146	1	3.1565
Tavl_2	Niki_4	UN	0.5163	0.4837	0	0.2419	0.820554	1	3.1897
Tavl_3	Niki_4	UN	0.5098	0.4902	0	0.2451	0.821897	1	3.3451
Tavl_4	Niki_4	UN	0.5834	0.4166	0	0.2083	0.820236	0.9999	2.904
Tolg_1	Niki_4	UN	0.5169	0.1939	0.2892	0.3862	0.870117	1	4.47
Tolg_2	Niki_4	UN	0.5254	0.1902	0.2844	0.3795	0.868826	1	4.5354
Tolg_3	Niki_4	UN	0.5374	0.1684	0.2942	0.3784	0.869089	1	4.5152
Tolg_4	Niki_4	UN	0.5462	0.1498	0.304	0.3789	0.869605	1	4.2788
Tossi_1	Niki_4	UN	0.4717	0.2287	0.2996	0.4139	0.87503	1	6.7432
Tossi_2	Niki_4	UN	0.5233	0.1599	0.3167	0.3967	0.87302	1	6.9324
Tossi_3	Niki_4	UN	0.5177	0.1621	0.3202	0.4013	0.873907	1	6.8649
Gorv_1	Niki_4	UN	0.021	0.1533	0.8257	0.9024	0.976649	1	83.7143
Gorv_2	Niki_4	UN	0.0176	0.1396	0.8428	0.9126	0.979033	1	147.25
Gorv_3	Niki_4	UN	0.0343	0.1404	0.8254	0.8955	0.975536	1	97.5
Gorv_5	Niki_4	UN	0.0464	0.1241	0.8295	0.8915	0.975075	1	83.1429
Lomash_1	Niki_4	UN	0.2422	0.7024	0.0554	0.4066	0.863108	1	8.8043
Lomash_2	Niki_4	UN	0.2448	0.7099	0.0453	0.4003	0.861647	1	8.9556
Lomash_3	Niki_4	UN	0.2471	0.7136	0.0393	0.3961	0.860722	1	7.88
Lomash_4	Niki_4	UN	0.2571	0.6886	0.0543	0.3986	0.861781	1	7.5962
Lomash_5	Niki_4	UN	0.2562	0.6861	0.0577	0.4008	0.862277	1	8.0816
Nadg_1	Niki_4	UN	0.3178	0.2889	0.3933	0.5378	0.899048	1	7.6349
Nadg_2	Niki_4	UN	0.3079	0.2971	0.395	0.5436	0.900053	1	7.5469
Nadg_3	Niki_4	UN	0.2973	0.321	0.3817	0.5422	0.899251	1	7.5312
Nadg_4	Niki_4	UN	0.3348	0.2637	0.4015	0.5333	0.898697	1	7.2769
Nadg_5	Niki_4	UN	0.3368	0.2594	0.4039	0.5335	0.898835	1	7.0149
Agl_1	Niki_4	UN	0.6812	0.107	0.2118	0.2653	0.847297	1	3.8704
Agl_2	Niki_4	UN	0.699	0.0845	0.2165	0.2587	0.84644	1	3.5702
Agl_3	Niki_4	UN	0.6767	0.1139	0.2095	0.2664	0.847366	1	3.4786
Agl_4	Niki_4	UN	0.7336	0.0196	0.2467	0.2565	0.84742	1	3.3388
DelMad_1	Niki_4	UN	0.4129	0.3584	0.2286	0.4079	0.870938	1	6.1892
DelMad_2	Niki_4	UN	0.3898	0.3668	0.2434	0.4268	0.87463	1	6.1467
DelMad_3	Niki_4	UN	0.3675	0.4334	0.199	0.4158	0.870903	1	6.9545
Niki_29_1	Niki_4	UN	1	0	0	0	0.767556	0	1.2181
Niki_29_2	Niki_4	UN	1	0	0	0	0.768	0	1.214
Niki_33_1	Niki_4	UN	1	0	0	0	0.78433	0.0216	1.6649
Niki_33_2	Niki_4	UN	1	0	0	0	0.783918	0.0006	1.5
Niki_35_1	Niki_4	UN	0.8379	0.1621	0	0.0811	0.802152	0.7164	2.1132
Niki_35_2	Niki_4	UN	0.8423	0.1577	0	0.0788	0.801982	0.8298	2.1935
Asco_2	Niki_4	UN	0.7968	0.1395	0.0637	0.1334	0.819594	0.9978	2.6547
Asco_4	Niki_4	UN	0.8303	0.0858	0.0839	0.1268	0.819413	1	3.4922
ChernRan_1	Niki_4	UN	0.8842	0.0949	0.0208	0.0683	0.807242	1	2.9784
ChernRan_2	Niki_4	UN	0.9009	0.0904	0.0087	0.0539	0.804402	1	3.3359
ChernRan_3	Niki_4	UN	0.9202	0.0572	0.0226	0.0512	0.804571	1	3.1095
Guk_2	Niki_4	UN	0.7867	0.1231	0.0902	0.1517	0.8237	0.9815	2.4552
Guk_4	Niki_4	UN	0.8272	0.0608	0.112	0.1424	0.823167	0.5623	2.0298
Guk_5	Niki_4	UN	0.8643	0	0.1357	0.1357	0.822076	0.6827	2.0932
Ispan_1	Niki_4	UN	0.5619	0.4381	0	0.2191	0.814022	0.8973	2.2846
Ispan_2	Niki_4	UN	0.5703	0.4297	0	0.2149	0.81255	0.9852	2.5118
Ispan_3	Niki_4	UN	0.4282	0.5718	0	0.2859	0.831513	0.9381	2.4149
Kali_1	Niki_4	UN	0.6591	0.2882	0.0527	0.1968	0.82928	0.9991	2.7388
Kali_2	Niki_4	UN	0.6675	0.2707	0.0618	0.1971	0.829736	0.9983	2.6917
Kali_3	Niki_4	UN	0.6728	0.2755	0.0517	0.1895	0.828068	0.9993	2.7612
Koker_1	Niki_4	UN	0.8636	0	0.1364	0.1364	0.821729	0.7268	2.1195
Koker_2	Niki_4	UN	0.8609	0	0.1391	0.1391	0.82239	0.7779	2.1538
Koker_3	Niki_4	UN	0.8663	0.0013	0.1324	0.1331	0.822556	0.8032	2.1709
Koker_4	Niki_4	UN	0.8697	0	0.1303	0.1303	0.820628	0.8284	2.1911
Kolh_2	Niki_4	UN	0.8462	0.1207	0.0331	0.0934	0.811822	0.9531	2.3557
Kolh_3	Niki_4	UN	0.8037	0.1701	0.0262	0.1112	0.814377	0.5882	2.0432
Nik_37_1	Niki_4	UN	1	0	0	0	0.766227	0.0075	1.63
Nik_37_2	Niki_4	UN	1	0	0	0	0.762613	0.0565	1.7489
Nik_37_3	Niki_4	UN	1	0	0	0	0.763286	0.0461	1.7327
Nisiot_1	Niki_4	UN	0.6337	0.348	0.0183	0.1923	0.827059	1	3.2743
Nisiot_2	Niki_4	UN	0.6417	0.3331	0.0253	0.1918	0.827275	0.9999	2.9754
Nisiot_3	Niki_4	UN	0.6641	0.2971	0.0388	0.1874	0.827161	1	3.0083
Nisiot_5	Niki_4	UN	0.6378	0.3325	0.0297	0.196	0.828147	1	3.1826
Ofel_2	Niki_4	UN	0.7952	0.1242	0.0807	0.1427	0.821835	0.9038	2.2642
Ofel_3	Niki_4	UN	0.7934	0.104	0.1026	0.1546	0.824713	0.8214	2.1796
Pian_1	Niki_4	UN	1	0	0	0	0.756567	0.0058	1.593
Pian_2	Niki_4	UN	1	0	0	0	0.757901	0.0064	1.5928
Pian_3	Niki_4	UN	1	0	0	0	0.754132	0.0028	1.5556
Pian_4	Niki_4	UN	1	0	0	0	0.753512	0.0082	1.6091
Pikv_1	Niki_4	UN	0.7781	0.1194	0.1026	0.1622	0.825929	1	3.6311
Pikv_2	Niki_4	UN	0.8276	0.0534	0.119	0.1457	0.823995	1	4.1416
Pikv_3	Niki_4	UN	0.8184	0.0432	0.1384	0.16	0.827145	1	3.9224
Pul_1	Niki_4	UN	1	0	0	0	0.773642	0.1318	1.8
Pul_3	Niki_4	UN	1	0	0	0	0.777438	0.6129	2.0559
Pul_4	Niki_4	UN	1	0	0	0	0.762963	0.9772	2.4061
SanKat_1	Niki_4	UN	0.7035	0.2226	0.0739	0.1852	0.82836	0.9824	2.4745
SanKat_2	Niki_4	UN	0.685	0.2339	0.0811	0.198	0.830732	0.9987	2.7231
SanKat_3	Niki_4	UN	0.7192	0.1574	0.1234	0.2021	0.833248	0.9945	2.5797
Skoro_2	Niki_4	UN	1	0	0	0	0.796812	0.9816	2.4201
Skoro_3	Niki_4	UN	1	0	0	0	0.79853	0.9093	2.2586
Skoro_5	Niki_4	UN	0.9294	0.0441	0.0265	0.0485	0.804316	0.9985	2.6471
Tlem_1	Niki_4	UN	0.8325	0.0659	0.1016	0.1346	0.821443	0.9517	2.3418
Tlem_2	Niki_4	UN	0.7979	0.1094	0.0928	0.1475	0.823128	0.9611	2.3677
Tlem_3	Niki_4	UN	0.8055	0.1047	0.0899	0.1422	0.822154	0.9685	2.3836
Tlem_4	Niki_4	UN	0.8267	0.0768	0.0965	0.1349	0.821265	0.9468	2.3272
Ubil_1	Niki_4	UN	0.8435	0	0.1565	0.1565	0.82206	0.3623	1.9337
Ubil_2	Niki_4	UN	0.8397	0	0.1603	0.1603	0.82085	0.1533	1.8161
VPec_4	Niki_4	UN	0.6516	0.3122	0.0363	0.1924	0.827852	0.9994	2.8016
VPec_5	Niki_4	UN	0.6254	0.3511	0.0235	0.199	0.828359	0.9997	2.8548
VPec_1	Niki_4	UN	0.6577	0.2957	0.0465	0.1944	0.828632	1	4.6458
Karre_1	Niki_4	UN	0.6729	0.3271	0	0.1636	0.768513	0.0166	1.6374
Karre_2	Niki_4	UN	0.7559	0.2441	0	0.122	0.760632	0.7453	2.1236
Karre_4	Niki_4	UN	1	0	0	0	0.758459	0.5704	2.0317
Bidz_1	Niki_4	UN	0.6054	0.3661	0.0285	0.2115	0.830593	1	4.567
Bidz_2	Niki_4	UN	0.6361	0.3241	0.0398	0.2019	0.829536	1	5.0638
Bidz_3	Niki_4	UN	0.6653	0.2761	0.0586	0.1966	0.829523	1	4.8526
Kore_1	Niki_4	UN	1	0	0	0	0.768955	0.0001	1.4619
Kore_2	Niki_4	UN	1	0	0	0	0.768802	0	1.4071
Kore_4	Niki_4	UN	1	0	0	0	0.768578	0.2167	1.8696
Lecc_1	Niki_4	UN	0.699	0.283	0.018	0.1595	0.82177	1	3.2893
Lecc_2	Niki_4	UN	0.6891	0.2972	0.0137	0.1623	0.822035	1	3.0538
Lecc_3	Niki_4	UN	0.7072	0.2685	0.0243	0.1585	0.821892	1	3.0078
Raco_1	Niki_4	UN	1	0	0	0	0.761117	0	1.4028
Raco_2	Niki_4	UN	1	0	0	0	0.762095	0	1.3727
Raco_3	Niki_4	UN	1	0	0	0	0.759606	0.0001	1.4151
OldOli_10	Niki_4	UN	0.0455	0.0983	0.8562	0.9054	0.978473	1	88.2857
OldOli_11	Niki_4	UN	0.0188	0.1168	0.8645	0.9229	0.981644	1	153.75
OldOli_12	Niki_4	UN	0.0221	0.1029	0.875	0.9264	0.982677	1	155.75
OldOli_13	Niki_4	UN	0.0234	0.1218	0.8548	0.9157	0.980077	1	123.2
OldOli_14	Niki_4	UN	0.021	0.1086	0.8704	0.9247	0.982203	1	87.7143
Tifli_2	Tifli_1	OT	0.019	0.1484	0.8326	0.9068	0.977655	1	88.5714
Tifli_4	Tifli_1	OT	0.0391	0.211	0.7499	0.8554	0.965771	1	88.2857
Bakin_1	Tifli_1	UN	1	0	0	0	0.789124	0.002	1.5502
Bakin_2	Tifli_1	UN	1	0	0	0	0.789548	0.0006	1.5023
Bakin_3	Tifli_1	UN	1	0	0	0	0.789149	0.0032	1.57
KrymP_1	Tifli_1	UN	0.8342	0	0.1658	0.1658	0.823777	0.6932	2.0988
KrymP_2	Tifli_1	UN	0.8331	0	0.1669	0.1669	0.824744	0.9033	2.2697
KrymP_3	Tifli_1	UN	0.8089	0.0039	0.1872	0.1891	0.833975	0.9837	2.4818
Mishor_1	Tifli_1	UN	0.7961	0.1733	0.0306	0.1173	0.815542	0.9875	2.4865
Mishor_2	Tifli_1	UN	0.7689	0.2311	0	0.1156	0.810526	0.9507	2.3442
Mishor_3	Tifli_1	UN	0.7833	0.2066	0.01	0.1134	0.814007	0.9699	2.4
Nik_6_1	Tifli_1	UN	0.6478	0.3522	0	0.1761	0.812601	1	3.0153
Nik_6_3	Tifli_1	UN	0.7048	0.2952	0	0.1476	0.811898	1	2.9924
Niki_5_1	Tifli_1	UN	0.7299	0.1991	0.071	0.1706	0.825877	0.9996	2.8106
Niki_5_2	Tifli_1	UN	0.7461	0.1808	0.0731	0.1635	0.824838	0.9997	2.8015
Niki_5_3	Tifli_1	UN	0.7228	0.2073	0.0699	0.1736	0.826311	0.9999	2.9389
Niki_5_4	Tifli_1	UN	0.7227	0.2052	0.0721	0.1747	0.826595	1	3.1008
Obil_1	Tifli_1	UN	0.9395	0	0.0605	0.0605	0.806688	0.914	2.2711
Obil_3	Tifli_1	UN	0.9456	0.0011	0.0533	0.0539	0.806353	0.8703	2.2216
Obil_4	Tifli_1	UN	1	0	0	0	0.788846	0.869	2.2189
Otur_1	Tifli_1	UN	0.7914	0.1006	0.108	0.1583	0.825544	0.9997	2.7847
Otur_3	Tifli_1	UN	0.8103	0.0737	0.116	0.1528	0.82501	0.9986	2.66
Otur_4	Tifli_1	UN	0.795	0.0953	0.1097	0.1574	0.825465	1	2.9281
Otur_5	Tifli_1	UN	0.7745	0.1183	0.1072	0.1663	0.826786	0.9998	2.838
Tavl_1	Tifli_1	UN	1	0	0	0	0.792663	0.1299	1.8073
Tavl_2	Tifli_1	UN	1	0	0	0	0.792247	0.3465	1.9297
Tavl_3	Tifli_1	UN	0.9838	0.0162	0	0.0081	0.79419	0.5485	2.0225
Tavl_4	Tifli_1	UN	1	0	0	0	0.790662	0.1109	1.7917
Tolg_1	Tifli_1	UN	0.6767	0.1961	0.1271	0.2252	0.837125	1	3.5714
Tolg_2	Tifli_1	UN	0.6797	0.1953	0.125	0.2227	0.836623	1	3.55
Tolg_3	Tifli_1	UN	0.6985	0.1667	0.1348	0.2182	0.836336	1	3.4754
Tolg_4	Tifli_1	UN	0.6995	0.1758	0.1247	0.2126	0.834994	1	3.4793
Tossi_1	Tifli_1	UN	0.7258	0.2742	0	0.1371	0.814484	1	3.0923
Tossi_2	Tifli_1	UN	0.7608	0.2392	0	0.1196	0.808998	1	3.189
Tossi_3	Tifli_1	UN	0.7561	0.2439	0	0.1219	0.812359	1	3.1969
Gorv_1	Tifli_1	UN	0.7564	0.1427	0.1009	0.1722	0.827459	0.9879	2.4932
Gorv_2	Tifli_1	UN	0.7641	0.1288	0.1071	0.1715	0.827624	0.9935	2.5479
Gorv_3	Tifli_1	UN	0.8025	0.0785	0.119	0.1583	0.826014	0.9754	2.42
Gorv_5	Tifli_1	UN	0.8252	0.0439	0.1309	0.1529	0.825669	0.8616	2.2174
Lomash_1	Tifli_1	UN	1	0	0	0	0.795025	0	1.3442
Lomash_2	Tifli_1	UN	1	0	0	0	0.795545	0	1.3014
Lomash_3	Tifli_1	UN	1	0	0	0	0.794489	0	1.3073
Lomash_4	Tifli_1	UN	1	0	0	0	0.794749	0	1.2785
Lomash_5	Tifli_1	UN	1	0	0	0	0.79349	0	1.276
Nadg_1	Tifli_1	UN	0.7185	0.1759	0.1056	0.1935	0.831092	1	3.2742
Nadg_2	Tifli_1	UN	0.7086	0.1877	0.1037	0.1976	0.831656	1	3.3171
Nadg_3	Tifli_1	UN	0.6873	0.2203	0.0925	0.2026	0.831973	1	3.5214
Nadg_4	Tifli_1	UN	0.7811	0.0914	0.1275	0.1732	0.828786	1	3.1667
Nadg_5	Tifli_1	UN	0.7606	0.12	0.1193	0.1793	0.829415	1	3.192
Agl_1	Tifli_1	UN	0.7347	0.0926	0.1727	0.219	0.838138	1	3.5932
Agl_2	Tifli_1	UN	0.737	0.0866	0.1764	0.2197	0.838418	1	3.4426
Agl_3	Tifli_1	UN	0.7301	0.1028	0.1671	0.2185	0.837801	1	3.5462
Agl_4	Tifli_1	UN	0.7765	0.0301	0.1935	0.2085	0.837362	1	3.2344
DelMad_1	Tifli_1	UN	0.7078	0.2436	0.0487	0.1704	0.824877	1	3.3659
DelMad_2	Tifli_1	UN	0.6889	0.2654	0.0457	0.1784	0.826022	1	3.4016
DelMad_3	Tifli_1	UN	0.6506	0.3265	0.0228	0.1861	0.826255	1	3.36
Niki_29_1	Tifli_1	UN	0.8188	0.0618	0.1194	0.1503	0.824748	1	3.0078
Niki_29_2	Tifli_1	UN	0.8167	0.0755	0.1078	0.1455	0.823476	1	2.9615
Niki_33_1	Tifli_1	UN	1	0	0	0	0.791665	0.1813	1.8429
Niki_33_2	Tifli_1	UN	1	0	0	0	0.791323	0.1373	1.8135
Niki_35_1	Tifli_1	UN	0.9544	0.0261	0.0195	0.0325	0.801441	0.4386	1.9716
Niki_35_2	Tifli_1	UN	0.9547	0.0255	0.0198	0.0326	0.801458	0.5369	2.0172
Asco_2	Tifli_1	UN	0.5908	0.1903	0.2189	0.3141	0.855445	1	5.1348
Asco_4	Tifli_1	UN	0.6025	0.3347	0.0628	0.2302	0.835096	1	5.2588
ChernRan_1	Tifli_1	UN	1	0	0	0	0.787738	0.8654	2.2182
ChernRan_2	Tifli_1	UN	1	0	0	0	0.778568	0.8561	2.2071
ChernRan_3	Tifli_1	UN	1	0	0	0	0.784182	0.8033	2.1647
Guk_2	Tifli_1	UN	1	0	0	0	0.795188	0.0002	1.4619
Guk_4	Tifli_1	UN	1	0	0	0	0.792614	0	1.3551
Guk_5	Tifli_1	UN	1	0	0	0	0.79433	0	1.3209
Ispan_1	Tifli_1	UN	1	0	0	0	0.794591	0.0123	1.6216
Ispan_2	Tifli_1	UN	1	0	0	0	0.794577	0.0115	1.623
Ispan_3	Tifli_1	UN	0.9108	0.0321	0.0571	0.0732	0.809619	0.0003	1.3878
Kali_1	Tifli_1	UN	1	0	0	0	0.79436	0.0305	1.6811
Kali_2	Tifli_1	UN	1	0	0	0	0.797308	0.0087	1.6073
Kali_3	Tifli_1	UN	1	0	0	0	0.794269	0.0776	1.7527
Koker_1	Tifli_1	UN	1	0	0	0	0.794025	0	1.3257
Koker_2	Tifli_1	UN	1	0	0	0	0.792853	0	1.3151
Koker_3	Tifli_1	UN	1	0	0	0	0.793624	0	1.3227
Koker_4	Tifli_1	UN	1	0	0	0	0.79306	0	1.3578
Kolh_2	Tifli_1	UN	0.9432	0	0.0568	0.0568	0.804254	0.3339	1.9231
Kolh_3	Tifli_1	UN	0.9696	0	0.0304	0.0304	0.799661	0.1224	1.7956
Nik_37_1	Tifli_1	UN	0.9121	0.0879	0	0.044	0.800005	0.8697	2.2202
Nik_37_2	Tifli_1	UN	0.8893	0.1107	0	0.0553	0.793252	0.7871	2.1538
Nik_37_3	Tifli_1	UN	0.9564	0.0436	0	0.0218	0.797201	0.8135	2.1737
Nisiot_1	Tifli_1	UN	0.8796	0.1002	0.0202	0.0703	0.807534	0.9218	2.2941
Nisiot_2	Tifli_1	UN	0.9189	0.0363	0.0448	0.0629	0.807437	0.8269	2.1887
Nisiot_3	Tifli_1	UN	0.9101	0.0523	0.0376	0.0637	0.807243	0.8514	2.2115
Nisiot_5	Tifli_1	UN	0.9115	0.0501	0.0384	0.0635	0.807245	0.8651	2.2244
Ofel_2	Tifli_1	UN	1	0	0	0	0.798764	0.7488	2.1279
Ofel_3	Tifli_1	UN	1	0	0	0	0.803317	0.4756	1.9888
Pian_1	Tifli_1	UN	1	0	0	0	0.765378	0.0293	1.6942
Pian_2	Tifli_1	UN	1	0	0	0	0.76722	0.0293	1.6942
Pian_3	Tifli_1	UN	1	0	0	0	0.764969	0.0101	1.6355
Pian_4	Tifli_1	UN	1	0	0	0	0.765779	0.0565	1.7402
Pikv_1	Tifli_1	UN	0.8366	0.1634	0	0.0817	0.792939	0.956	2.3548
Pikv_2	Tifli_1	UN	0.8171	0.1829	0	0.0914	0.785978	0.9795	2.4342
Pikv_3	Tifli_1	UN	0.8676	0.1324	0	0.0662	0.790443	0.9555	2.3526
Pul_1	Tifli_1	UN	1	0	0	0	0.780571	0.118	1.7935
Pul_3	Tifli_1	UN	1	0	0	0	0.7819	0.5869	2.0419
Pul_4	Tifli_1	UN	1	0	0	0	0.759159	0.1463	1.8214
SanKat_1	Tifli_1	UN	1	0	0	0	0.795832	0	1.3871
SanKat_2	Tifli_1	UN	1	0	0	0	0.800432	0.0009	1.5074
SanKat_3	Tifli_1	UN	1	0	0	0	0.799685	0.0014	1.5314
Skoro_2	Tifli_1	UN	1	0	0	0	0.767113	0	1.4229
Skoro_3	Tifli_1	UN	1	0	0	0	0.772042	0	1.4248
Skoro_5	Tifli_1	UN	1	0	0	0	0.784885	0.359	1.9362
Tlem_1	Tifli_1	UN	0.8047	0.1041	0.0912	0.1432	0.822374	1	3.4417
Tlem_2	Tifli_1	UN	0.7709	0.1495	0.0796	0.1543	0.823648	1	3.3852
Tlem_3	Tifli_1	UN	0.7708	0.1436	0.0856	0.1574	0.824399	1	3.3984
Tlem_4	Tifli_1	UN	0.7946	0.1135	0.0919	0.1486	0.823278	1	3.5424
Ubil_1	Tifli_1	UN	0.8297	0	0.1703	0.1703	0.821327	0.8695	2.2264
Ubil_2	Tifli_1	UN	1	0	0	0	0.819524	0.8004	2.1667
VPec_4	Tifli_1	UN	0.9108	0.0385	0.0507	0.07	0.808829	0.5	2
VPec_5	Tifli_1	UN	0.9009	0.0619	0.0373	0.0682	0.807952	0.6606	2.0812
VPec_1	Tifli_1	UN	0.8375	0.1625	0	0.0813	0.79313	0.8959	2.2581
Karre_1	Tifli_1	UN	1	0	0	0	0.775186	0.0725	1.7513
Karre_2	Tifli_1	UN	1	0	0	0	0.758128	0.1025	1.7868
Karre_4	Tifli_1	UN	1	0	0	0	0.752298	0.0224	1.6779
Bidz_1	Tifli_1	UN	0.8278	0.1722	0	0.0861	0.795887	0.8205	2.1847
Bidz_2	Tifli_1	UN	0.8196	0.1804	0	0.0902	0.787571	0.8197	2.1835
Bidz_3	Tifli_1	UN	0.8646	0.1354	0	0.0677	0.792501	0.8032	2.1709
Kore_1	Tifli_1	UN	1	0	0	0	0.777285	0.0611	1.7476
Kore_2	Tifli_1	UN	1	0	0	0	0.77842	0.0345	1.7067
Kore_4	Tifli_1	UN	1	0	0	0	0.760067	0.0015	1.5479
Lecc_1	Tifli_1	UN	0.8229	0.1128	0.0643	0.1207	0.817572	1	3.392
Lecc_2	Tifli_1	UN	0.7997	0.1559	0.0445	0.1224	0.816972	1	3.0677
Lecc_3	Tifli_1	UN	0.8279	0.1119	0.0602	0.1161	0.81666	1	3.1923
Raco_1	Tifli_1	UN	1	0	0	0	0.769409	0.0005	1.509
Raco_2	Tifli_1	UN	1	0	0	0	0.768329	0.0003	1.4843
Raco_3	Tifli_1	UN	1	0	0	0	0.76749	0.0004	1.5022
OldOli_10	Tifli_1	UN	0.7794	0.2182	0.0024	0.1115	0.813367	0.9691	2.3947
OldOli_11	Tifli_1	UN	0.8303	0.121	0.0487	0.1092	0.815035	0.9324	2.3077
OldOli_12	Tifli_1	UN	0.7951	0.1866	0.0183	0.1116	0.814087	0.9569	2.3595
OldOli_13	Tifli_1	UN	0.7918	0.1759	0.0323	0.1202	0.816088	0.9243	2.2949
OldOli_14	Tifli_1	UN	0.7912	0.1797	0.0291	0.119	0.815748	0.9909	2.517
Tifli_4	Tifli_2	OT	0.0389	0.1675	0.7937	0.8774	0.971225	1	208
Bakin_1	Tifli_2	UN	1	0	0	0	0.786256	0.0016	1.5407
Bakin_2	Tifli_2	UN	1	0	0	0	0.786601	0.0002	1.4698
Bakin_3	Tifli_2	UN	1	0	0	0	0.786587	0.0019	1.5498
KrymP_1	Tifli_2	UN	0.8377	0	0.1623	0.1623	0.823108	0.6705	2.0859
KrymP_2	Tifli_2	UN	0.8438	0	0.1562	0.1562	0.823615	0.8785	2.2387
KrymP_3	Tifli_2	UN	0.8326	0.0049	0.1625	0.165	0.829008	0.931	2.3172
Mishor_1	Tifli_2	UN	0.8037	0.1652	0.0311	0.1137	0.814983	0.9691	2.3947
Mishor_2	Tifli_2	UN	0.7673	0.2327	0	0.1164	0.809272	0.9094	2.2722
Mishor_3	Tifli_2	UN	0.7879	0.2107	0.0014	0.1068	0.812567	0.9243	2.2949
Nik_6_1	Tifli_2	UN	0.7035	0.2965	0	0.1482	0.812619	1	3
Nik_6_3	Tifli_2	UN	0.7358	0.2642	0	0.1321	0.811431	0.9999	2.9259
Niki_5_1	Tifli_2	UN	0.7588	0.1698	0.0714	0.1563	0.823602	0.9986	2.6857
Niki_5_2	Tifli_2	UN	0.7755	0.1526	0.0718	0.1481	0.822312	0.9978	2.6434
Niki_5_3	Tifli_2	UN	0.7534	0.1764	0.0702	0.1584	0.82389	0.9996	2.7914
Niki_5_4	Tifli_2	UN	0.7486	0.1764	0.075	0.1632	0.824876	1	3
Obil_1	Tifli_2	UN	0.9199	0.0359	0.0442	0.0621	0.807283	0.7944	2.1579
Obil_3	Tifli_2	UN	0.9311	0.0188	0.0502	0.0596	0.807132	0.5845	2.0395
Obil_4	Tifli_2	UN	0.9049	0.0951	0	0.0476	0.790795	0.7668	2.1387
Otur_1	Tifli_2	UN	0.8281	0.0496	0.1223	0.1471	0.824372	0.9954	2.5621
Otur_3	Tifli_2	UN	0.8413	0.0266	0.1321	0.1454	0.824528	0.9973	2.6053
Otur_4	Tifli_2	UN	0.8138	0.0584	0.1278	0.157	0.826202	0.9994	2.7279
Otur_5	Tifli_2	UN	0.7935	0.0812	0.1253	0.1659	0.827515	0.998	2.6333
Tavl_1	Tifli_2	UN	1	0	0	0	0.793989	0.205	1.8564
Tavl_2	Tifli_2	UN	1	0	0	0	0.793788	0.4879	1.9945
Tavl_3	Tifli_2	UN	0.9521	0.0479	0	0.024	0.795178	0.6541	2.0743
Tavl_4	Tifli_2	UN	1	0	0	0	0.792319	0.2326	1.8723
Tolg_1	Tifli_2	UN	0.6574	0.2202	0.1224	0.2325	0.838089	1	3.4065
Tolg_2	Tifli_2	UN	0.6604	0.2172	0.1224	0.231	0.837858	1	3.5083
Tolg_3	Tifli_2	UN	0.6735	0.196	0.1305	0.2285	0.837808	1	3.4508
Tolg_4	Tifli_2	UN	0.6856	0.1792	0.1352	0.2248	0.837409	1	3.4262
Tossi_1	Tifli_2	UN	0.7476	0.2379	0.0145	0.1334	0.817424	1	3.2344
Tossi_2	Tifli_2	UN	0.7964	0.2036	0	0.1018	0.809969	1	3.1462
Tossi_3	Tifli_2	UN	0.778	0.2085	0.0135	0.1178	0.814868	1	3.0909
Gorv_1	Tifli_2	UN	0.7511	0.1628	0.0862	0.1675	0.82606	0.9666	2.3856
Gorv_2	Tifli_2	UN	0.7665	0.137	0.0966	0.1651	0.826119	0.9662	2.3831
Gorv_3	Tifli_2	UN	0.8214	0.0636	0.115	0.1468	0.823993	0.9362	2.3141
Gorv_5	Tifli_2	UN	0.8384	0.0416	0.1201	0.1408	0.823261	0.7525	2.1325
Lomash_1	Tifli_2	UN	1	0	0	0	0.794711	0	1.375
Lomash_2	Tifli_2	UN	1	0	0	0	0.794733	0	1.3213
Lomash_3	Tifli_2	UN	1	0	0	0	0.793995	0	1.3273
Lomash_4	Tifli_2	UN	1	0	0	0	0.79441	0	1.2489
Lomash_5	Tifli_2	UN	1	0	0	0	0.793838	0	1.2304
Nadg_1	Tifli_2	UN	0.7056	0.198	0.0964	0.1954	0.83099	1	3
Nadg_2	Tifli_2	UN	0.6979	0.2063	0.0958	0.1989	0.831527	1	2.9627
Nadg_3	Tifli_2	UN	0.6778	0.24	0.0822	0.2022	0.831451	1	3.1575
Nadg_4	Tifli_2	UN	0.7756	0.104	0.1204	0.1724	0.828355	0.9999	2.903
Nadg_5	Tifli_2	UN	0.7697	0.1113	0.1189	0.1746	0.828637	0.9997	2.8043
Agl_1	Tifli_2	UN	0.7161	0.1315	0.1524	0.2182	0.837109	1	3.6957
Agl_2	Tifli_2	UN	0.724	0.124	0.152	0.214	0.836416	1	3.525
Agl_3	Tifli_2	UN	0.7038	0.1598	0.1364	0.2163	0.83611	1	3.5167
Agl_4	Tifli_2	UN	0.7611	0.0689	0.17	0.2045	0.835683	1	3.3387
DelMad_1	Tifli_2	UN	0.7427	0.1875	0.0698	0.1636	0.824705	1	3.2154
DelMad_2	Tifli_2	UN	0.7139	0.2311	0.0549	0.1705	0.825159	1	3.1374
DelMad_3	Tifli_2	UN	0.6869	0.2641	0.049	0.181	0.826595	1	3.2061
Niki_29_1	Tifli_2	UN	0.765	0.1411	0.0939	0.1645	0.825912	1	3.2521
Niki_29_2	Tifli_2	UN	0.7584	0.1577	0.0839	0.1627	0.825188	1	3.2101
Niki_33_1	Tifli_2	UN	1	0	0	0	0.791736	0.2608	1.8871
Niki_33_2	Tifli_2	UN	1	0	0	0	0.791446	0.205	1.8564
Niki_35_1	Tifli_2	UN	0.9772	0	0.0228	0.0228	0.799882	0.5971	2.046
Niki_35_2	Tifli_2	UN	0.973	0	0.027	0.027	0.800225	0.6433	2.069
Asco_2	Tifli_2	UN	0.5864	0.1748	0.2388	0.3262	0.858262	1	5.8
Asco_4	Tifli_2	UN	0.5936	0.3274	0.079	0.2427	0.837825	1	5.7468
ChernRan_1	Tifli_2	UN	0.9179	0.0821	0	0.041	0.787382	0.9262	2.2938
ChernRan_2	Tifli_2	UN	0.856	0.144	0	0.072	0.778115	0.8647	2.2169
ChernRan_3	Tifli_2	UN	0.909	0.091	0	0.0455	0.78438	0.7488	2.1279
Guk_2	Tifli_2	UN	1	0	0	0	0.796192	0.0004	1.481
Guk_4	Tifli_2	UN	1	0	0	0	0.793378	0	1.3108
Guk_5	Tifli_2	UN	1	0	0	0	0.79377	0	1.3628
Ispan_1	Tifli_2	UN	1	0	0	0	0.793271	0.003	1.5521
Ispan_2	Tifli_2	UN	1	0	0	0	0.792997	0.0009	1.5025
Ispan_3	Tifli_2	UN	0.8906	0.0705	0.0389	0.0741	0.808969	0.0001	1.3576
Kali_1	Tifli_2	UN	1	0	0	0	0.793445	0.0192	1.6505
Kali_2	Tifli_2	UN	1	0	0	0	0.796268	0.0248	1.6684
Kali_3	Tifli_2	UN	1	0	0	0	0.79365	0.077	1.7514
Koker_1	Tifli_2	UN	1	0	0	0	0.793199	0	1.3004
Koker_2	Tifli_2	UN	1	0	0	0	0.79255	0	1.2844
Koker_3	Tifli_2	UN	1	0	0	0	0.793096	0	1.3094
Koker_4	Tifli_2	UN	1	0	0	0	0.793271	0	1.3453
Kolh_2	Tifli_2	UN	0.9534	0	0.0466	0.0466	0.803703	0.3011	1.9071
Kolh_3	Tifli_2	UN	1	0	0	0	0.799787	0.1976	1.8475
Nik_37_1	Tifli_2	UN	0.8856	0.1144	0	0.0572	0.803064	0.9435	2.321
Nik_37_2	Tifli_2	UN	0.8704	0.1296	0	0.0648	0.796356	0.8128	2.1726
Nik_37_3	Tifli_2	UN	0.9431	0.0543	0.0026	0.0297	0.800242	0.8717	2.2242
Nisiot_1	Tifli_2	UN	0.8825	0.1113	0.0063	0.0619	0.805577	0.6349	2.0663
Nisiot_2	Tifli_2	UN	0.9172	0.0499	0.0329	0.0578	0.806088	0.6225	2.0595
Nisiot_3	Tifli_2	UN	0.9129	0.0569	0.0302	0.0587	0.80611	0.525	2.0118
Nisiot_5	Tifli_2	UN	0.9142	0.0598	0.026	0.0559	0.805486	0.4134	1.9595
Ofel_2	Tifli_2	UN	1	0	0	0	0.799526	0.6433	2.069
Ofel_3	Tifli_2	UN	1	0	0	0	0.803244	0.6319	2.0632
Pian_1	Tifli_2	UN	1	0	0	0	0.766067	0.0846	1.7723
Pian_2	Tifli_2	UN	1	0	0	0	0.766571	0.0705	1.7562
Pian_3	Tifli_2	UN	1	0	0	0	0.766681	0.0611	1.7476
Pian_4	Tifli_2	UN	1	0	0	0	0.765873	0.1292	1.8109
Pikv_1	Tifli_2	UN	0.7816	0.2184	0	0.1092	0.795371	0.99	2.5068
Pikv_2	Tifli_2	UN	0.767	0.233	0	0.1165	0.788291	0.9973	2.625
Pikv_3	Tifli_2	UN	0.798	0.202	0	0.101	0.792798	0.9891	2.4966
Pul_1	Tifli_2	UN	1	0	0	0	0.781502	0.0333	1.6927
Pul_3	Tifli_2	UN	0.8817	0.1183	0	0.0591	0.783548	0.2465	1.8771
Pul_4	Tifli_2	UN	1	0	0	0	0.760166	0.1535	1.8265
SanKat_1	Tifli_2	UN	1	0	0	0	0.794238	0	1.3604
SanKat_2	Tifli_2	UN	1	0	0	0	0.799052	0.001	1.5123
SanKat_3	Tifli_2	UN	1	0	0	0	0.797667	0.0004	1.4857
Skoro_2	Tifli_2	UN	1	0	0	0	0.770018	0.0065	1.6077
Skoro_3	Tifli_2	UN	1	0	0	0	0.774301	0.0051	1.5972
Skoro_5	Tifli_2	UN	1	0	0	0	0.78667	0.476	1.9892
Tlem_1	Tifli_2	UN	0.7386	0.2042	0.0573	0.1593	0.823471	1	3.4098
Tlem_2	Tifli_2	UN	0.7407	0.1953	0.064	0.1617	0.824141	1	3.377
Tlem_3	Tifli_2	UN	0.7153	0.2212	0.0635	0.1741	0.826114	1	3.315
Tlem_4	Tifli_2	UN	0.7368	0.1946	0.0686	0.1659	0.825021	1	3.5417
Ubil_1	Tifli_2	UN	0.8391	0	0.1609	0.1609	0.822495	0.9699	2.4
Ubil_2	Tifli_2	UN	0.8373	0	0.1627	0.1627	0.819764	0.9167	2.2857
VPec_4	Tifli_2	UN	0.9326	0.021	0.0464	0.0569	0.806538	0.1649	1.8268
VPec_5	Tifli_2	UN	0.9163	0.0556	0.0281	0.0559	0.805579	0.2734	1.8895
VPec_1	Tifli_2	UN	0.8308	0.1692	0	0.0846	0.791677	0.6106	2.0536
Karre_1	Tifli_2	UN	1	0	0	0	0.776128	0.1863	1.8441
Karre_2	Tifli_2	UN	1	0	0	0	0.758159	0.1088	1.7929
Karre_4	Tifli_2	UN	1	0	0	0	0.753471	0.0601	1.7451
Bidz_1	Tifli_2	UN	0.8197	0.1803	0	0.0901	0.794638	0.5867	2.0417
Bidz_2	Tifli_2	UN	0.8247	0.1753	0	0.0876	0.787054	0.6341	2.0655
Bidz_3	Tifli_2	UN	0.872	0.128	0	0.064	0.791059	0.4501	1.9766
Kore_1	Tifli_2	UN	1	0	0	0	0.778208	0.0805	1.7685
Kore_2	Tifli_2	UN	1	0	0	0	0.77952	0.0896	1.7772
Kore_4	Tifli_2	UN	1	0	0	0	0.759998	0.0038	1.586
Lecc_1	Tifli_2	UN	0.7861	0.1587	0.0552	0.1346	0.819403	1	3.432
Lecc_2	Tifli_2	UN	0.7663	0.1953	0.0384	0.136	0.818898	1	3.1053
Lecc_3	Tifli_2	UN	0.8011	0.1439	0.055	0.1269	0.818162	1	3.368
Raco_1	Tifli_2	UN	1	0	0	0	0.770996	0.0024	1.5668
Raco_2	Tifli_2	UN	1	0	0	0	0.769987	0.0006	1.5112
Raco_3	Tifli_2	UN	1	0	0	0	0.768907	0.0016	1.552
OldOli_10	Tifli_2	UN	0.7726	0.2274	0	0.1137	0.811353	0.8986	2.2579
OldOli_11	Tifli_2	UN	0.8501	0.0982	0.0517	0.1008	0.813818	0.7983	2.1636
OldOli_12	Tifli_2	UN	0.8141	0.1735	0.0125	0.0992	0.811836	0.8616	2.2174
OldOli_13	Tifli_2	UN	0.8055	0.1681	0.0265	0.1105	0.814269	0.8318	2.1902
OldOli_14	Tifli_2	UN	0.8035	0.1715	0.025	0.1108	0.814248	0.9094	2.2722
Bakin_1	Tifli_4	UN	1	0	0	0	0.772375	0.0014	1.5399
Bakin_2	Tifli_4	UN	1	0	0	0	0.773397	0.0002	1.4658
Bakin_3	Tifli_4	UN	1	0	0	0	0.77339	0.0023	1.5607
KrymP_1	Tifli_4	UN	0.8939	0	0.1061	0.1061	0.810364	0.4875	1.9941
KrymP_2	Tifli_4	UN	0.898	0	0.102	0.102	0.809676	0.5623	2.0298
KrymP_3	Tifli_4	UN	0.8957	0.0132	0.0911	0.0977	0.815051	0.9178	2.2966
Mishor_1	Tifli_4	UN	0.8931	0.0272	0.0797	0.0933	0.813848	0.9999	2.9085
Mishor_2	Tifli_4	UN	0.8955	0.0223	0.0822	0.0933	0.813966	1	3.1007
Mishor_3	Tifli_4	UN	0.899	0.0035	0.0975	0.0993	0.815592	1	3.0797
Nik_6_1	Tifli_4	UN	0.8272	0.1434	0.0294	0.1011	0.812896	1	3.9322
Nik_6_3	Tifli_4	UN	0.8589	0.0978	0.0433	0.0922	0.812077	1	3.9492
Niki_5_1	Tifli_4	UN	0.8466	0.1481	0.0053	0.0793	0.808335	0.9998	2.8444
Niki_5_2	Tifli_4	UN	0.8752	0.1052	0.0196	0.0722	0.807809	0.9998	2.8321
Niki_5_3	Tifli_4	UN	0.8519	0.1356	0.0125	0.0803	0.808806	0.9998	2.8357
Niki_5_4	Tifli_4	UN	0.8421	0.1489	0.009	0.0835	0.80916	1	3.0224
Obil_1	Tifli_4	UN	1	0	0	0	0.791451	0.8561	2.2071
Obil_3	Tifli_4	UN	1	0	0	0	0.790511	0.4879	1.9944
Obil_4	Tifli_4	UN	1	0	0	0	0.794992	1	2.9467
Otur_1	Tifli_4	UN	0.9116	0.0312	0.0571	0.0727	0.809554	0.998	2.6376
Otur_3	Tifli_4	UN	0.9234	0.0112	0.0654	0.071	0.809629	0.9989	2.6824
Otur_4	Tifli_4	UN	0.8972	0.0398	0.063	0.0829	0.811438	0.9999	2.8511
Otur_5	Tifli_4	UN	0.8747	0.0643	0.061	0.0931	0.812996	0.9994	2.7379
Tavl_1	Tifli_4	UN	1	0	0	0	0.777519	0.2722	1.8936
Tavl_2	Tifli_4	UN	1	0	0	0	0.776596	0.5	2
Tavl_3	Tifli_4	UN	1	0	0	0	0.778076	0.5722	2.0335
Tavl_4	Tifli_4	UN	1	0	0	0	0.776361	0.293	1.9043
Tolg_1	Tifli_4	UN	0.7624	0.1728	0.0648	0.1512	0.822501	1	3.5462
Tolg_2	Tifli_4	UN	0.762	0.1739	0.0642	0.1511	0.82245	1	3.687
Tolg_3	Tifli_4	UN	0.7872	0.1329	0.0799	0.1464	0.822381	1	3.525
Tolg_4	Tifli_4	UN	0.7926	0.1203	0.0871	0.1472	0.822836	1	3.5546
Tossi_1	Tifli_4	UN	0.8324	0.0898	0.0778	0.1227	0.818487	1	4.0174
Tossi_2	Tifli_4	UN	0.8595	0.054	0.0865	0.1135	0.817385	1	4.4907
Tossi_3	Tifli_4	UN	0.856	0.045	0.0991	0.1215	0.819239	1	4.177
Gorv_1	Tifli_4	UN	0.8524	0.1216	0.026	0.0868	0.810448	0.9591	2.3636
Gorv_2	Tifli_4	UN	0.8621	0.099	0.0389	0.0884	0.811272	0.9726	2.4052
Gorv_3	Tifli_4	UN	0.9259	0.0114	0.0627	0.0684	0.809098	0.8986	2.2579
Gorv_5	Tifli_4	UN	0.9268	0	0.0732	0.0732	0.809756	0.8392	2.1963
Lomash_1	Tifli_4	UN	1	0	0	0	0.779108	0	1.3214
Lomash_2	Tifli_4	UN	1	0	0	0	0.778771	0	1.2609
Lomash_3	Tifli_4	UN	1	0	0	0	0.778562	0	1.2795
Lomash_4	Tifli_4	UN	1	0	0	0	0.77929	0	1.2478
Lomash_5	Tifli_4	UN	1	0	0	0	0.77856	0	1.2318
Nadg_1	Tifli_4	UN	0.8125	0.1466	0.0408	0.1142	0.815491	1	2.9776
Nadg_2	Tifli_4	UN	0.8027	0.155	0.0423	0.1198	0.816462	1	3.0455
Nadg_3	Tifli_4	UN	0.7828	0.1916	0.0255	0.1214	0.815974	1	3.2302
Nadg_4	Tifli_4	UN	0.8869	0.0364	0.0768	0.0949	0.813986	1	3.0076
Nadg_5	Tifli_4	UN	0.8743	0.0504	0.0754	0.1006	0.814825	1	2.9624
Agl_1	Tifli_4	UN	0.8033	0.0866	0.1101	0.1534	0.824843	1	3.713
Agl_2	Tifli_4	UN	0.8201	0.0596	0.1203	0.1501	0.82476	1	3.4553
Agl_3	Tifli_4	UN	0.7989	0.098	0.1031	0.1521	0.824318	1	3.5
Agl_4	Tifli_4	UN	0.8536	0.0059	0.1405	0.1434	0.824578	1	3.1364
DelMad_1	Tifli_4	UN	0.8451	0.1472	0.0077	0.0813	0.808756	1	3.2197
DelMad_2	Tifli_4	UN	0.8052	0.1948	0	0.0974	0.809643	1	3.2077
DelMad_3	Tifli_4	UN	0.7528	0.2472	0	0.1236	0.810247	1	3.1894
Niki_29_1	Tifli_4	UN	0.8592	0.1115	0.0293	0.0851	0.810306	1	3.0238
Niki_29_2	Tifli_4	UN	0.8571	0.1164	0.0265	0.0847	0.810131	1	2.9843
Niki_33_1	Tifli_4	UN	1	0	0	0	0.777286	0.1516	1.8238
Niki_33_2	Tifli_4	UN	1	0	0	0	0.776557	0.1739	1.8385
Niki_35_1	Tifli_4	UN	1	0	0	0	0.785309	0.7311	2.1183
Niki_35_2	Tifli_4	UN	1	0	0	0	0.785958	0.6891	2.0941
Asco_2	Tifli_4	UN	0.653	0.1891	0.1579	0.2524	0.842854	1	5.3678
Asco_4	Tifli_4	UN	0.658	0.1496	0.1924	0.2672	0.846752	1	6.9324
ChernRan_1	Tifli_4	UN	1	0	0	0	0.78515	0.9969	2.5823
ChernRan_2	Tifli_4	UN	1	0	0	0	0.783198	1	3.0483
ChernRan_3	Tifli_4	UN	1	0	0	0	0.786018	1	2.9
Guk_2	Tifli_4	UN	1	0	0	0	0.780879	0.0013	1.5291
Guk_4	Tifli_4	UN	1	0	0	0	0.777458	0	1.3303
Guk_5	Tifli_4	UN	1	0	0	0	0.777995	0	1.344
Ispan_1	Tifli_4	UN	1	0	0	0	0.777717	0.0022	1.5389
Ispan_2	Tifli_4	UN	1	0	0	0	0.777718	0.0002	1.4612
Ispan_3	Tifli_4	UN	1	0	0	0	0.790248	0	1.2785
Kali_1	Tifli_4	UN	1	0	0	0	0.778282	0.0176	1.6492
Kali_2	Tifli_4	UN	1	0	0	0	0.77869	0.0017	1.535
Kali_3	Tifli_4	UN	1	0	0	0	0.777113	0.0546	1.7258
Koker_1	Tifli_4	UN	1	0	0	0	0.778854	0	1.3944
Koker_2	Tifli_4	UN	1	0	0	0	0.778457	0	1.3814
Koker_3	Tifli_4	UN	1	0	0	0	0.77875	0	1.4
Koker_4	Tifli_4	UN	1	0	0	0	0.778342	0	1.4019
Kolh_2	Tifli_4	UN	1	0	0	0	0.786037	0.1863	1.8441
Kolh_3	Tifli_4	UN	1	0	0	0	0.783123	0.1493	1.8156
Nik_37_1	Tifli_4	UN	0.9317	0	0.0683	0.0683	0.805217	1	2.9474
Nik_37_2	Tifli_4	UN	1	0	0	0	0.803395	1	3.2098
Nik_37_3	Tifli_4	UN	1	0	0	0	0.80531	1	3.1748
Nisiot_1	Tifli_4	UN	0.9587	0.0413	0	0.0207	0.791644	0.6345	2.0659
Nisiot_2	Tifli_4	UN	1	0	0	0	0.791772	0.5495	2.0234
Nisiot_3	Tifli_4	UN	1	0	0	0	0.792015	0.6228	2.0599
Nisiot_5	Tifli_4	UN	1	0	0	0	0.791586	0.5249	2.0118
Ofel_2	Tifli_4	UN	1	0	0	0	0.784022	0.6421	2.0678
Ofel_3	Tifli_4	UN	1	0	0	0	0.789003	0.5365	2.0169
Pian_1	Tifli_4	UN	1	0	0	0	0.750896	0.1623	1.8333
Pian_2	Tifli_4	UN	1	0	0	0	0.752074	0.0846	1.7723
Pian_3	Tifli_4	UN	1	0	0	0	0.750282	0.013	1.6495
Pian_4	Tifli_4	UN	1	0	0	0	0.750974	0.1	1.7871
Pikv_1	Tifli_4	UN	0.9561	0.0439	0	0.022	0.795124	1	3.3692
Pikv_2	Tifli_4	UN	0.9518	0.0482	0	0.0241	0.795426	1	3.8033
Pikv_3	Tifli_4	UN	0.9825	0.0175	0	0.0088	0.795739	1	3.6
Pul_1	Tifli_4	UN	1	0	0	0	0.766918	0.0151	1.6447
Pul_3	Tifli_4	UN	1	0	0	0	0.766676	0.2187	1.8619
Pul_4	Tifli_4	UN	1	0	0	0	0.762165	0.9885	2.4588
SanKat_1	Tifli_4	UN	1	0	0	0	0.779262	0	1.2194
SanKat_2	Tifli_4	UN	1	0	0	0	0.783631	0	1.362
SanKat_3	Tifli_4	UN	1	0	0	0	0.782458	0	1.3498
Skoro_2	Tifli_4	UN	1	0	0	0	0.775251	0.9181	2.2637
Skoro_3	Tifli_4	UN	1	0	0	0	0.777016	0.823	2.1702
Skoro_5	Tifli_4	UN	1	0	0	0	0.784812	0.9848	2.4353
Tlem_1	Tifli_4	UN	0.8498	0.1387	0.0116	0.0809	0.808858	1	3.6239
Tlem_2	Tifli_4	UN	0.8492	0.138	0.0128	0.0818	0.809059	1	3.371
Tlem_3	Tifli_4	UN	0.8248	0.1642	0.0111	0.0932	0.810808	1	3.5328
Tlem_4	Tifli_4	UN	0.8317	0.1591	0.0093	0.0888	0.810027	1	3.7069
Ubil_1	Tifli_4	UN	1	0	0	0	0.808539	0.9754	2.42
Ubil_2	Tifli_4	UN	1	0	0	0	0.806451	0.9486	2.3421
VPec_4	Tifli_4	UN	1	0	0	0	0.792212	0.2542	1.88
VPec_5	Tifli_4	UN	1	0	0	0	0.791293	0.2067	1.8531
VPec_1	Tifli_4	UN	1	0	0	0	0.793734	0.9999	2.8681
Karre_1	Tifli_4	UN	1	0	0	0	0.760329	0.0374	1.7041
Karre_2	Tifli_4	UN	1	0	0	0	0.75705	0.9666	2.358
Karre_4	Tifli_4	UN	1	0	0	0	0.756466	0.9885	2.4514
Bidz_1	Tifli_4	UN	1	0	0	0	0.795347	0.9999	2.8425
Bidz_2	Tifli_4	UN	1	0	0	0	0.793336	1	3.15
Bidz_3	Tifli_4	UN	1	0	0	0	0.796032	0.9998	2.7947
Kore_1	Tifli_4	UN	1	0	0	0	0.760948	0.0616	1.7488
Kore_2	Tifli_4	UN	1	0	0	0	0.763879	0.0902	1.7783
Kore_4	Tifli_4	UN	1	0	0	0	0.762352	0.4313	1.9703
Lecc_1	Tifli_4	UN	0.8543	0.1457	0	0.0729	0.804103	1	3.2769
Lecc_2	Tifli_4	UN	0.8296	0.1704	0	0.0852	0.802306	1	3.0294
Lecc_3	Tifli_4	UN	0.8793	0.1207	0	0.0604	0.802879	1	3.1832
Raco_1	Tifli_4	UN	1	0	0	0	0.754157	0.0007	1.5179
Raco_2	Tifli_4	UN	1	0	0	0	0.753363	0.0012	1.5405
Raco_3	Tifli_4	UN	1	0	0	0	0.752009	0.0006	1.5156
OldOli_10	Tifli_4	UN	0.8793	0.0467	0.0739	0.0973	0.814242	1	3.0216
OldOli_11	Tifli_4	UN	0.8812	0	0.1188	0.1188	0.81572	0.9999	2.8819
OldOli_12	Tifli_4	UN	0.8996	0	0.1004	0.1004	0.815449	1	3.1397
OldOli_13	Tifli_4	UN	0.9077	0	0.0923	0.0923	0.814115	0.9992	2.6954
OldOli_14	Tifli_4	UN	0.9002	0	0.0998	0.0998	0.815697	1	3.0072
Bakin_2	Bakin_1	OT	0.029	0.0316	0.9394	0.9552	0.990141	1	77.125
Bakin_3	Bakin_1	OT	0.0369	0.0269	0.9361	0.9496	0.989094	1	103
KrymP_1	Bakin_1	UN	1	0	0	0	0.796294	0	1.0757
KrymP_2	Bakin_1	UN	1	0	0	0	0.80216	0	1.2189
KrymP_3	Bakin_1	UN	1	0	0	0	0.806646	0	1.161
Mishor_1	Bakin_1	UN	0.892	0.0372	0.0708	0.0894	0.812825	0.3662	1.9375
Mishor_2	Bakin_1	UN	0.856	0.1425	0.0014	0.0727	0.807096	0.4021	1.9545
Mishor_3	Bakin_1	UN	0.8802	0.0694	0.0504	0.0851	0.811236	0.2985	1.9045
Nik_6_1	Bakin_1	UN	0.8714	0.116	0.0126	0.0706	0.807251	0.9273	2.2975
Nik_6_3	Bakin_1	UN	0.8878	0.0936	0.0187	0.0654	0.80669	0.9094	2.2722
Niki_5_1	Bakin_1	UN	0.8637	0	0.1363	0.1363	0.821082	0.8018	2.1688
Niki_5_2	Bakin_1	UN	0.8682	0	0.1318	0.1318	0.82127	0.9296	2.3052
Niki_5_3	Bakin_1	UN	0.8656	0	0.1344	0.1344	0.821503	0.8353	2.1962
Niki_5_4	Bakin_1	UN	0.8668	0	0.1332	0.1332	0.822503	0.9817	2.4497
Obil_1	Bakin_1	UN	1	0	0	0	0.786668	0	1.2679
Obil_3	Bakin_1	UN	1	0	0	0	0.786886	0	1.2735
Obil_4	Bakin_1	UN	1	0	0	0	0.767119	0	1.1949
Otur_1	Bakin_1	UN	0.8712	0	0.1288	0.1288	0.820713	0.3321	1.9213
Otur_3	Bakin_1	UN	0.8736	0	0.1264	0.1264	0.8199	0.344	1.9274
Otur_4	Bakin_1	UN	0.8651	0.0242	0.1107	0.1228	0.819961	0.5735	2.0347
Otur_5	Bakin_1	UN	0.8819	0	0.1181	0.1181	0.819346	0.5123	2.0057
Tavl_1	Bakin_1	UN	1	0	0	0	0.788705	0.0016	1.5366
Tavl_2	Bakin_1	UN	1	0	0	0	0.788228	0.0029	1.5673
Tavl_3	Bakin_1	UN	1	0	0	0	0.787897	0.0037	1.5756
Tavl_4	Bakin_1	UN	1	0	0	0	0.786783	0.0005	1.4953
Tolg_1	Bakin_1	UN	0.8508	0.0283	0.1209	0.1351	0.822375	0.8365	2.1916
Tolg_2	Bakin_1	UN	0.8803	0	0.1197	0.1197	0.819778	0.8647	2.2169
Tolg_3	Bakin_1	UN	0.8801	0.0001	0.1198	0.1199	0.81988	0.89	2.2439
Tolg_4	Bakin_1	UN	0.8722	0	0.1278	0.1278	0.820534	0.8771	2.2289
Tossi_1	Bakin_1	UN	0.9478	0	0.0522	0.0522	0.805038	0.3552	1.9326
Tossi_2	Bakin_1	UN	0.9559	0.0441	0	0.0221	0.79881	0.2385	1.8736
Tossi_3	Bakin_1	UN	0.9382	0.0348	0.0269	0.0444	0.803668	0.5862	2.0412
[truncated: 8,879 more rows]
