# Supplementary material for: Genetic Diversity of Common Olive (Olea europaea L.) Cultivars from Nikita Botanical Gardens Collection Revealed Using RAD-Seq Method
Source: Genes (Basel). 2023 Jun 23;14(7):1323. doi: 10.3390/genes14071323 (PMC10379327; doi:10.3390/genes14071323)
Supplement: Supplementary file 1 [file genes-14-01323-s001.zip › Table S5.xlsx]

## Sheet: Лист2
	Dalm_2	Dalm_3	Dalm_4	Dalm_5	Dalm_6	Niki_2_1	Niki_2_2	Niki_2_4	Niki_2	Niki_3	Niki_4	Tifli_1	Tifli_2	Tifli_4	Bakin_1	Bakin_2	Bakin_3	KrymP_1	KrymP_2	KrymP_3	Mishor_1	Mishor_2	Mishor_3	Nik_6_1	Nik_6_3	Niki_5_1	Niki_5_2	Niki_5_3	Niki_5_4	Obil_1	Obil_3	Obil_4	Otur_1	Otur_3	Otur_4	Otur_5	Tavl_1	Tavl_2	Tavl_3	Tavl_4	Tolg_1	Tolg_2	Tolg_3	Tolg_4	Tossi_1	Tossi_2	Tossi_3	Gorv_1	Gorv_2
Dalm_2	1.0029	0.745759	0.67259	0.612207	0.667659	-0.0530661	-0.0393828	-0.0775913	-0.0763286	-0.0825343	-0.120446	0.656826	0.682276	0.677678	-0.0697354	-0.07119	-0.0703418	0.0787998	0.081095	0.0302784	-0.113476	-0.117952	-0.112824	-0.0894399	-0.0937418	-0.0734246	-0.0856773	-0.0733002	-0.0758778	-0.0158176	-0.00744151	-0.0290968	-0.066534	-0.0696718	-0.063212	-0.0568909	-0.0563938	-0.0489865	-0.0455178	-0.0499288	0.00892651	0.00835584	0.0120182	0.00496624	-0.0684184	-0.0862391	-0.078841	-0.0959407	-0.101332
Dalm_3	0.745759	0.92846	0.675652	0.607941	0.665347	-0.0632654	-0.0529244	-0.0876983	-0.0745629	-0.0833928	-0.116137	0.651426	0.681171	0.680936	-0.052556	-0.0530727	-0.0550305	0.0928642	0.101196	0.0363857	-0.107951	-0.112524	-0.108324	-0.0536674	-0.0562874	-0.0415921	-0.0530976	-0.0384735	-0.0403053	-0.0202309	-0.0141299	-0.0354822	-0.0779421	-0.0812734	-0.0753937	-0.0693553	-0.0713046	-0.0652318	-0.0588997	-0.0637565	0.0160886	0.0147267	0.0169869	0.00764273	-0.0413073	-0.0551114	-0.0488893	-0.0960179	-0.0965695
Dalm_4	0.67259	0.675652	1.16356	0.833542	0.92263	-0.0941823	-0.0873137	-0.0326511	-0.122083	-0.12884	-0.0693099	0.880843	0.912569	1.05272	-0.106767	-0.10483	-0.10778	0.0370472	0.0193257	0.0308898	-0.0657906	-0.0394083	-0.0571304	-0.0200902	-0.0195694	-0.0990668	-0.112643	-0.0999867	-0.0995964	-0.0532649	-0.0597631	0.049146	-0.109871	-0.112014	-0.102223	-0.0963408	-0.0981407	-0.0918886	-0.0865791	-0.0826391	-0.0096736	-0.00636445	-0.00736821	-0.00540642	0.0266966	0.0542151	0.0316978	-0.136339	-0.138367
Dalm_5	0.612207	0.607941	0.833542	0.96509	0.851991	-0.0542963	-0.0630417	-0.0993717	-0.0871153	-0.0937134	-0.122873	0.817841	0.836692	0.839833	-0.0643696	-0.0640562	-0.0633719	0.0493868	0.035061	0.0563203	-0.111737	-0.126101	-0.121471	-0.0740983	-0.0730504	-0.0413918	-0.0602713	-0.0511572	-0.0551755	-0.0233489	-0.0288762	-0.050975	-0.0743578	-0.0778108	-0.0733511	-0.0671631	-0.0546754	-0.0584714	-0.0523487	-0.0584865	0.0158766	0.0160471	0.0165987	0.0135084	-0.0522328	-0.0632727	-0.0565156	-0.0946774	-0.0990607
Dalm_6	0.667659	0.665347	0.92263	0.851991	1.02781	-0.062368	-0.0671165	-0.0987984	-0.091268	-0.103915	-0.129464	0.87932	0.891229	0.931716	-0.0651226	-0.0619303	-0.0608167	0.0492202	0.0376909	0.0554233	-0.11998	-0.132787	-0.13039	-0.0894592	-0.0918478	-0.0520384	-0.0627271	-0.0586776	-0.0681389	-0.0258938	-0.0345334	-0.054004	-0.0720278	-0.0712906	-0.0748015	-0.0708982	-0.0455824	-0.0585815	-0.0474478	-0.0543637	0.0232703	0.0218312	0.0199375	0.0156242	-0.0550167	-0.0648493	-0.0608317	-0.09829	-0.101392
Niki_2_1	-0.0530661	-0.0632654	-0.0941823	-0.0542963	-0.062368	0.679283	0.584242	0.571063	0.0549908	0.0529815	0.0358185	-0.0512233	-0.054897	-0.0847498	-0.0415087	-0.0422255	-0.0431888	0.0142323	0.0136109	0.0324769	0.0407171	0.0302259	0.02906	0.12004	0.119415	0.127449	0.133922	0.133953	0.134926	-0.0349833	-0.0351407	-0.0630295	0.581848	0.586739	0.595011	0.590586	-0.0750713	-0.078339	-0.0747979	-0.0768569	0.104723	0.103056	0.100585	0.100587	0.0723357	0.0658837	0.0646312	0.04848	0.0541853
Niki_2_2	-0.0393828	-0.0529244	-0.0873137	-0.0630417	-0.0671165	0.584242	0.649304	0.580728	0.0661717	0.0640657	0.0406567	-0.0625943	-0.0567466	-0.0816141	-0.0366548	-0.041896	-0.0441053	0.0231233	0.020717	0.0187589	0.0352516	0.0311688	0.0357706	0.120639	0.12122	0.119143	0.130265	0.128322	0.139542	-0.028387	-0.0326322	-0.0486922	0.581428	0.588958	0.60299	0.599769	-0.0817064	-0.0807018	-0.0816887	-0.074466	0.108465	0.108828	0.106775	0.110272	0.0709827	0.0662157	0.0705468	0.05769	0.0575204
Niki_2_4	-0.0775913	-0.0876983	-0.0326511	-0.0993717	-0.0987984	0.571063	0.580728	0.746607	0.0395817	0.0378275	0.0950418	-0.0950537	-0.0959652	-0.0408972	-0.0648862	-0.0621965	-0.0663446	0.0106555	-0.000670165	0.00516179	0.0783132	0.0935452	0.0908738	0.170901	0.164869	0.101726	0.121214	0.112645	0.120498	-0.0595674	-0.0553509	0.00684766	0.587363	0.59313	0.605859	0.597648	-0.0954635	-0.0983541	-0.0961854	-0.0879904	0.0829025	0.0811036	0.0849507	0.0879304	0.115683	0.139971	0.129376	0.0315823	0.0406324
Niki_2	-0.0763286	-0.0745629	-0.122083	-0.0871153	-0.091268	0.0549908	0.0661717	0.0395817	0.614339	0.514251	0.509688	-0.0779137	-0.0850426	-0.116029	-0.0370844	-0.0374794	-0.0396224	0.169138	0.178392	0.174577	0.5099	0.506717	0.507193	0.0313491	0.0264143	0.0292659	0.0401892	0.0375185	0.0420114	-0.113062	-0.0982943	-0.14589	0.0473662	0.0524037	0.0534626	0.0568015	0.00157516	-0.00246094	0.00205543	0.00313365	0.0551932	0.0536883	0.0572019	0.0557085	0.0295434	0.0182446	0.0141334	0.52673	0.525592
Niki_3	-0.0825343	-0.0833928	-0.12884	-0.0937134	-0.103915	0.0529815	0.0640657	0.0378275	0.514251	0.615156	0.503019	-0.08441	-0.0914332	-0.120758	-0.0325872	-0.032565	-0.0365848	0.165347	0.17033	0.164561	0.501115	0.502059	0.500154	0.0322985	0.0265967	0.0251539	0.0352263	0.0316105	0.0373404	-0.106707	-0.0938459	-0.137543	0.041515	0.0497255	0.0515495	0.0514333	-0.00508529	-0.007986	-0.00208138	0.000942926	0.0591007	0.0591545	0.0649641	0.0630466	0.0363182	0.0259086	0.021452	0.524678	0.521275
Niki_4	-0.120446	-0.116137	-0.0693099	-0.122873	-0.129464	0.0358185	0.0406567	0.0950418	0.509688	0.503019	0.671499	-0.119581	-0.131468	-0.0829007	-0.0535784	-0.0533935	-0.0534829	0.144667	0.149152	0.151967	0.575296	0.601778	0.594093	0.0817253	0.0789097	0.0116741	0.0328091	0.0314428	0.027428	-0.140047	-0.131586	-0.0895548	0.03957	0.0430155	0.0420303	0.0406861	-0.00364175	-0.0124007	-0.0103008	-0.00597088	0.0385939	0.0355967	0.0389183	0.0404962	0.0916228	0.103679	0.088353	0.532833	0.540768
Tifli_1	0.656826	0.651426	0.880843	0.817841	0.87932	-0.0512233	-0.0625943	-0.0950537	-0.0779137	-0.08441	-0.119581	0.999091	0.883387	0.887163	-0.0608448	-0.059219	-0.0600678	0.0609508	0.0494816	0.0764222	-0.111768	-0.1223	-0.117821	-0.0741652	-0.0769222	-0.0492299	-0.0670069	-0.0539314	-0.0587595	-0.0216232	-0.0171505	-0.0472964	-0.0691947	-0.0737638	-0.0752987	-0.0691263	-0.068733	-0.0658565	-0.0571665	-0.0666073	0.0198465	0.0167211	0.017817	0.0135199	-0.0472506	-0.0592622	-0.0579655	-0.099171	-0.102888
Tifli_2	0.682276	0.681171	0.912569	0.836692	0.891229	-0.054897	-0.0567466	-0.0959652	-0.0850426	-0.0914332	-0.131468	0.883387	0.996658	0.914446	-0.0785005	-0.079931	-0.0822265	0.0585087	0.0467453	0.0501402	-0.116579	-0.128254	-0.125837	-0.0830752	-0.084575	-0.0661067	-0.0844182	-0.0711737	-0.0721601	-0.016324	-0.0113013	-0.0334859	-0.0830189	-0.0848221	-0.0753598	-0.0695673	-0.0634327	-0.0550812	-0.0489357	-0.057962	0.021028	0.0220004	0.0253998	0.0223635	-0.0425439	-0.0602312	-0.0537066	-0.103734	-0.109231
Tifli_4	0.677678	0.680936	1.05272	0.839833	0.931716	-0.0847498	-0.0816141	-0.0408972	-0.116029	-0.120758	-0.0829007	0.887163	0.914446	1.11564	-0.0984714	-0.0945353	-0.0977917	0.0554068	0.0329026	0.0359295	-0.0818167	-0.0671387	-0.0738579	-0.0437397	-0.0447399	-0.0921789	-0.104456	-0.0936583	-0.0959201	-0.0462786	-0.0500133	0.0253326	-0.100902	-0.102077	-0.0924698	-0.0857368	-0.0909831	-0.0852489	-0.0797761	-0.0808704	-0.000722223	0.00155396	0.00343125	0.00509261	0.00385069	0.0203022	0.0105074	-0.128362	-0.129718
Bakin_1	-0.0697354	-0.052556	-0.106767	-0.0643696	-0.0651226	-0.0415087	-0.0366548	-0.0648862	-0.0370844	-0.0325872	-0.0535784	-0.0608448	-0.0785005	-0.0984714	1.1401	1.0974	1.07983	-0.067434	-0.0467814	-0.0511665	-0.0572699	-0.0628564	-0.0612231	-0.0572005	-0.0566869	-0.0330272	-0.0300102	-0.0318496	-0.0281262	-0.0712846	-0.0732657	-0.107617	-0.0328121	-0.0387025	-0.0353365	-0.041356	-0.0272736	-0.0267985	-0.0326477	-0.0275644	-0.00050228	-0.0111253	-0.00758027	-0.00379424	-0.0650551	-0.0661132	-0.0611093	-0.0342924	-0.026006
Bakin_2	-0.07119	-0.0530727	-0.10483	-0.0640562	-0.0619303	-0.0422255	-0.041896	-0.0621965	-0.0374794	-0.032565	-0.0533935	-0.059219	-0.079931	-0.0945353	1.0974	1.1601	1.09803	-0.063879	-0.0451658	-0.0505783	-0.0594386	-0.0630688	-0.0594948	-0.0601085	-0.0612495	-0.035098	-0.0297923	-0.0358207	-0.0378981	-0.0726302	-0.0795469	-0.112174	-0.0313767	-0.032913	-0.0398986	-0.0401381	-0.0254853	-0.0330199	-0.0349731	-0.030257	-0.0121637	-0.0213791	-0.0157495	-0.0143636	-0.0698871	-0.0690287	-0.0682228	-0.0349562	-0.0282424
Bakin_3	-0.0703418	-0.0550305	-0.10778	-0.0633719	-0.0608167	-0.0431888	-0.0441053	-0.0663446	-0.0396224	-0.0365848	-0.0534829	-0.0600678	-0.0822265	-0.0977917	1.07983	1.09803	1.14659	-0.0692491	-0.0500223	-0.0511726	-0.0588713	-0.0632713	-0.0609762	-0.0619126	-0.0614492	-0.0301008	-0.0277164	-0.0252659	-0.0380793	-0.0730874	-0.0791443	-0.112338	-0.0218036	-0.0318986	-0.0393091	-0.043307	-0.0173172	-0.0283585	-0.0353973	-0.0287533	-0.00742134	-0.0207601	-0.0163949	-0.0135244	-0.0679832	-0.0637126	-0.0640859	-0.0357921	-0.0288614
KrymP_1	0.0787998	0.0928642	0.0370472	0.0493868	0.0492202	0.0142323	0.0231233	0.0106555	0.169138	0.165347	0.144667	0.0609508	0.0585087	0.0554068	-0.067434	-0.063879	-0.0692491	1.01493	0.853052	0.745789	0.149467	0.144916	0.144562	-0.0185037	-0.0244302	-0.00989145	-0.0116919	-0.00450276	-0.00273655	-0.0137094	-0.0152071	-0.0313244	0.0164851	0.0105009	0.0170625	0.0201841	-0.089299	-0.0782188	-0.0785452	-0.0661203	-0.00156269	0.0010712	0.00605161	-0.0032879	0.0551109	0.0447747	0.0411982	0.170851	0.163022
KrymP_2	0.081095	0.101196	0.0193257	0.035061	0.0376909	0.0136109	0.020717	-0.000670165	0.178392	0.17033	0.149152	0.0494816	0.0467453	0.0329026	-0.0467814	-0.0451658	-0.0500223	0.853052	0.9804	0.722076	0.151416	0.147836	0.150482	-0.00229802	-0.00665475	0.00150284	0.00411092	0.0106267	0.0139254	-0.0223704	-0.0190357	-0.0452769	0.00890559	0.00759364	0.0097457	0.00944331	-0.0781774	-0.0719369	-0.0699606	-0.06453	0.00504125	0.00858959	0.0134234	0.00404244	0.0576337	0.0471876	0.0463039	0.174337	0.165425
KrymP_3	0.0302784	0.0363857	0.0308898	0.0563203	0.0554233	0.0324769	0.0187589	0.00516179	0.174577	0.164561	0.151967	0.0764222	0.0501402	0.0359295	-0.0511665	-0.0505783	-0.0511726	0.745789	0.722076	0.888614	0.158719	0.146637	0.150911	-0.0116248	-0.0110855	0.00876828	0.00956257	0.0123452	0.00626826	-0.000745482	-0.0029495	-0.0227774	0.027009	0.0198082	0.0164772	0.0174797	-0.0795307	-0.0814957	-0.0832753	-0.0786638	0.00162414	-0.000559936	-0.000469103	-0.00516118	0.0516352	0.0433477	0.0416034	0.172929	0.169912
Mishor_1	-0.113476	-0.107951	-0.0657906	-0.111737	-0.11998	0.0407171	0.0352516	0.0783132	0.5099	0.501115	0.575296	-0.111768	-0.116579	-0.0818167	-0.0572699	-0.0594386	-0.0588713	0.149467	0.151416	0.158719	0.691481	0.597689	0.581944	0.0870005	0.0812553	0.0134714	0.0278486	0.0272297	0.0262739	-0.137204	-0.124026	-0.0900198	0.0303748	0.0303902	0.0396587	0.0362255	-0.00635261	-0.0131809	-0.00949431	-0.00612707	0.0407388	0.0375581	0.040745	0.0387235	0.0985093	0.106038	0.0921497	0.529858	0.531744
Mishor_2	-0.117952	-0.112524	-0.0394083	-0.126101	-0.132787	0.0302259	0.0311688	0.0935452	0.506717	0.502059	0.601778	-0.1223	-0.128254	-0.0671387	-0.0628564	-0.0630688	-0.0632713	0.144916	0.147836	0.146637	0.597689	0.708661	0.61537	0.106233	0.10539	0.00795821	0.0241779	0.0216595	0.0234819	-0.149041	-0.135182	-0.0732727	0.0233141	0.0253623	0.0323253	0.0331358	-0.015387	-0.0179553	-0.0159707	-0.0154047	0.0416174	0.0401125	0.0453537	0.0423246	0.111989	0.137651	0.113682	0.53202	0.533574
Mishor_3	-0.112824	-0.108324	-0.0571304	-0.121471	-0.13039	0.02906	0.0357706	0.0908738	0.507193	0.500154	0.594093	-0.117821	-0.125837	-0.0738579	-0.0612231	-0.0594948	-0.0609762	0.144562	0.150482	0.150911	0.581944	0.61537	0.683113	0.0929161	0.091117	0.0094972	0.0215091	0.0253183	0.0245072	-0.145256	-0.135344	-0.0850702	0.0259099	0.0326131	0.0362319	0.0362747	-0.0121661	-0.0217622	-0.0171061	-0.0147132	0.0382557	0.0344474	0.0408403	0.0374274	0.100244	0.121347	0.0973789	0.527604	0.53142
Nik_6_1	-0.0894399	-0.0536674	-0.0200902	-0.0740983	-0.0894592	0.12004	0.120639	0.170901	0.0313491	0.0322985	0.0817253	-0.0741652	-0.0830752	-0.0437397	-0.0572005	-0.0601085	-0.0619126	-0.0185037	-0.00229802	-0.0116248	0.0870005	0.106233	0.0929161	0.731012	0.631256	0.521402	0.547984	0.536925	0.570618	-0.077387	-0.0693638	-0.0117336	0.107671	0.114462	0.116247	0.111157	-0.110934	-0.112342	-0.111404	-0.110482	0.11185	0.115579	0.115899	0.119433	0.180421	0.203354	0.191957	0.0285206	0.0332476
Nik_6_3	-0.0937418	-0.0562874	-0.0195694	-0.0730504	-0.0918478	0.119415	0.12122	0.164869	0.0264143	0.0265967	0.0789097	-0.0769222	-0.084575	-0.0447399	-0.0566869	-0.0612495	-0.0614492	-0.0244302	-0.00665475	-0.0110855	0.0812553	0.10539	0.091117	0.631256	0.743315	0.54176	0.560793	0.553724	0.580506	-0.0763324	-0.0676649	-0.0104398	0.104615	0.112941	0.114934	0.109986	-0.112231	-0.114358	-0.112077	-0.111394	0.111813	0.114793	0.112356	0.113742	0.16999	0.201443	0.186879	0.0274771	0.0347679
Niki_5_1	-0.0734246	-0.0415921	-0.0990668	-0.0413918	-0.0520384	0.127449	0.119143	0.101726	0.0292659	0.0251539	0.0116741	-0.0492299	-0.0661067	-0.0921789	-0.0330272	-0.035098	-0.0301008	-0.00989145	0.00150284	0.00876828	0.0134714	0.00795821	0.0094972	0.521402	0.54176	0.665266	0.578633	0.56655	0.570354	-0.0597541	-0.0522037	-0.0888328	0.130807	0.136163	0.123177	0.11891	-0.0792778	-0.0845247	-0.0841532	-0.0847578	0.119974	0.12558	0.117572	0.123105	0.0974475	0.104235	0.104361	0.0377589	0.043347
Niki_5_2	-0.0856773	-0.0530976	-0.112643	-0.0602713	-0.0627271	0.133922	0.130265	0.121214	0.0401892	0.0352263	0.0328091	-0.0670069	-0.0844182	-0.104456	-0.0300102	-0.0297923	-0.0277164	-0.0116919	0.00411092	0.00956257	0.0278486	0.0241779	0.0215091	0.547984	0.560793	0.578633	0.662156	0.596361	0.604861	-0.0641639	-0.0550111	-0.0840667	0.150535	0.157495	0.140901	0.138458	-0.0832839	-0.0930963	-0.0960879	-0.0957234	0.136888	0.138064	0.13558	0.138739	0.0971309	0.109864	0.109826	0.0468355	0.0593312
Niki_5_3	-0.0733002	-0.0384735	-0.0999867	-0.0511572	-0.0586776	0.133953	0.128322	0.112645	0.0375185	0.0316105	0.0314428	-0.0539314	-0.0711737	-0.0936583	-0.0318496	-0.0358207	-0.0252659	-0.00450276	0.0106267	0.0123452	0.0272297	0.0216595	0.0253183	0.536925	0.553724	0.56655	0.596361	0.662744	0.591528	-0.0646018	-0.062843	-0.0906132	0.15094	0.149534	0.133125	0.130797	-0.0857619	-0.0937964	-0.0975294	-0.0990738	0.136867	0.138227	0.133126	0.136389	0.103296	0.111991	0.113953	0.0449825	0.0550033
Niki_5_4	-0.0758778	-0.0403053	-0.0995964	-0.0551755	-0.0681389	0.134926	0.139542	0.120498	0.0420114	0.0373404	0.027428	-0.0587595	-0.0721601	-0.0959201	-0.0281262	-0.0378981	-0.0380793	-0.00273655	0.0139254	0.00626826	0.0262739	0.0234819	0.0245072	0.570618	0.580506	0.570354	0.604861	0.591528	0.655608	-0.0657811	-0.0532821	-0.0851589	0.138123	0.145289	0.145523	0.140382	-0.0853297	-0.0852504	-0.0885231	-0.0860962	0.140433	0.143989	0.142511	0.144473	0.108052	0.11591	0.117964	0.0463119	0.0552102
Obil_1	-0.0158176	-0.0202309	-0.0532649	-0.0233489	-0.0258938	-0.0349833	-0.028387	-0.0595674	-0.113062	-0.106707	-0.140047	-0.0216232	-0.016324	-0.0462786	-0.0712846	-0.0726302	-0.0730874	-0.0137094	-0.0223704	-0.000745482	-0.137204	-0.149041	-0.145256	-0.077387	-0.0763324	-0.0597541	-0.0641639	-0.0646018	-0.0657811	0.997365	0.877811	0.890059	-0.040672	-0.0440494	-0.0345447	-0.0365474	-0.0380793	-0.046784	-0.041035	-0.0437121	-0.0340161	-0.0335334	-0.037337	-0.0375294	0.165366	0.148932	0.159613	-0.119343	-0.125702
Obil_3	-0.00744151	-0.0141299	-0.0597631	-0.0288762	-0.0345334	-0.0351407	-0.0326322	-0.0553509	-0.0982943	-0.0938459	-0.131586	-0.0171505	-0.0113013	-0.0500133	-0.0732657	-0.0795469	-0.0791443	-0.0152071	-0.0190357	-0.0029495	-0.124026	-0.135182	-0.135344	-0.0693638	-0.0676649	-0.0522037	-0.0550111	-0.062843	-0.0532821	0.877811	1.0066	0.89545	-0.0521097	-0.0521148	-0.0369522	-0.0385899	-0.047821	-0.0521985	-0.0463096	-0.0492685	-0.037184	-0.0350304	-0.0406754	-0.0387228	0.154929	0.146421	0.151671	-0.113901	-0.116797
Obil_4	-0.0290968	-0.0354822	0.049146	-0.050975	-0.054004	-0.0630295	-0.0486922	0.00684766	-0.14589	-0.137543	-0.0895548	-0.0472964	-0.0334859	0.0253326	-0.107617	-0.112174	-0.112338	-0.0313244	-0.0452769	-0.0227774	-0.0900198	-0.0732727	-0.0850702	-0.0117336	-0.0104398	-0.0888328	-0.0840667	-0.0906132	-0.0851589	0.890059	0.89545	1.12486	-0.0599166	-0.0663545	-0.0467864	-0.0487747	-0.0710956	-0.0713749	-0.0695363	-0.0648615	-0.0578799	-0.0573507	-0.0587126	-0.0568965	0.230312	0.251615	0.24247	-0.15494	-0.157758
Otur_1	-0.066534	-0.0779421	-0.109871	-0.0743578	-0.0720278	0.581848	0.581428	0.587363	0.0473662	0.041515	0.03957	-0.0691947	-0.0830189	-0.100902	-0.0328121	-0.0313767	-0.0218036	0.0164851	0.00890559	0.027009	0.0303748	0.0233141	0.0259099	0.107671	0.104615	0.130807	0.150535	0.15094	0.138123	-0.040672	-0.0521097	-0.0599166	0.678912	0.631431	0.616509	0.614546	-0.0654243	-0.0694762	-0.0740995	-0.0724929	0.112546	0.103484	0.109429	0.108702	0.0603193	0.0629696	0.0639355	0.0497709	0.0594476
Otur_3	-0.0696718	-0.0812734	-0.112014	-0.0778108	-0.0712906	0.586739	0.588958	0.59313	0.0524037	0.0497255	0.0430155	-0.0737638	-0.0848221	-0.102077	-0.0387025	-0.032913	-0.0318986	0.0105009	0.00759364	0.0198082	0.0303902	0.0253623	0.0326131	0.114462	0.112941	0.136163	0.157495	0.149534	0.145289	-0.0440494	-0.0521148	-0.0663545	0.631431	0.678374	0.624971	0.621784	-0.0664248	-0.0728918	-0.0755649	-0.061801	0.112037	0.110186	0.110256	0.11049	0.0605973	0.0669666	0.0630221	0.0549325	0.0626986
Otur_4	-0.063212	-0.0753937	-0.102223	-0.0733511	-0.0748015	0.595011	0.60299	0.605859	0.0534626	0.0515495	0.0420303	-0.0752987	-0.0753598	-0.0924698	-0.0353365	-0.0398986	-0.0393091	0.0170625	0.0097457	0.0164772	0.0396587	0.0323253	0.0362319	0.116247	0.114934	0.123177	0.140901	0.133125	0.145523	-0.0345447	-0.0369522	-0.0467864	0.616509	0.624971	0.666468	0.633494	-0.0720886	-0.0713675	-0.072525	-0.0621613	0.111031	0.107736	0.1109	0.111668	0.070129	0.0707112	0.0726502	0.0556916	0.0673483
Otur_5	-0.0568909	-0.0693553	-0.0963408	-0.0671631	-0.0708982	0.590586	0.599769	0.597648	0.0568015	0.0514333	0.0406861	-0.0691263	-0.0695673	-0.0857368	-0.041356	-0.0401381	-0.043307	0.0201841	0.00944331	0.0174797	0.0362255	0.0331358	0.0362747	0.111157	0.109986	0.11891	0.138458	0.130797	0.140382	-0.0365474	-0.0385899	-0.0487747	0.614546	0.621784	0.633494	0.663091	-0.0685572	-0.0695653	-0.0694332	-0.0613879	0.119242	0.11809	0.114863	0.122008	0.0724197	0.07147	0.0740111	0.0562624	0.0653124
Tavl_1	-0.0563938	-0.0713046	-0.0981407	-0.0546754	-0.0455824	-0.0750713	-0.0817064	-0.0954635	0.00157516	-0.00508529	-0.00364175	-0.068733	-0.0634327	-0.0909831	-0.0272736	-0.0254853	-0.0173172	-0.089299	-0.0781774	-0.0795307	-0.00635261	-0.015387	-0.0121661	-0.110934	-0.112231	-0.0792778	-0.0832839	-0.0857619	-0.0853297	-0.0380793	-0.047821	-0.0710956	-0.0654243	-0.0664248	-0.0720886	-0.0685572	1.07264	1.00936	1.00369	1.01056	-0.0687661	-0.0770137	-0.0720242	-0.0698101	-0.141581	-0.151213	-0.150841	0.0209063	0.012584
Tavl_2	-0.0489865	-0.0652318	-0.0918886	-0.0584714	-0.0585815	-0.078339	-0.0807018	-0.0983541	-0.00246094	-0.007986	-0.0124007	-0.0658565	-0.0550812	-0.0852489	-0.0267985	-0.0330199	-0.0283585	-0.0782188	-0.0719369	-0.0814957	-0.0131809	-0.0179553	-0.0217622	-0.112342	-0.114358	-0.0845247	-0.0930963	-0.0937964	-0.0852504	-0.046784	-0.0521985	-0.0713749	-0.0694762	-0.0728918	-0.0713675	-0.0695653	1.00936	1.07658	1.0294	1.03945	-0.077999	-0.0824201	-0.0755192	-0.0761688	-0.144496	-0.153293	-0.153407	0.0145712	0.0128274
Tavl_3	-0.0455178	-0.0588997	-0.0865791	-0.0523487	-0.0474478	-0.0747979	-0.0816887	-0.0961854	0.00205543	-0.00208138	-0.0103008	-0.0571665	-0.0489357	-0.0797761	-0.0326477	-0.0349731	-0.0353973	-0.0785452	-0.0699606	-0.0832753	-0.00949431	-0.0159707	-0.0171061	-0.111404	-0.112077	-0.0841532	-0.0960879	-0.0975294	-0.0885231	-0.041035	-0.0463096	-0.0695363	-0.0740995	-0.0755649	-0.072525	-0.0694332	1.00369	1.0294	1.06517	1.02757	-0.0784099	-0.0826871	-0.0790399	-0.0805829	-0.141091	-0.153536	-0.152662	0.0195141	0.0117111
Tavl_4	-0.0499288	-0.0637565	-0.0826391	-0.0584865	-0.0543637	-0.0768569	-0.074466	-0.0879904	0.00313365	0.000942926	-0.00597088	-0.0666073	-0.057962	-0.0808704	-0.0275644	-0.030257	-0.0287533	-0.0661203	-0.06453	-0.0786638	-0.00612707	-0.0154047	-0.0147132	-0.110482	-0.111394	-0.0847578	-0.0957234	-0.0990738	-0.0860962	-0.0437121	-0.0492685	-0.0648615	-0.0724929	-0.061801	-0.0621613	-0.0613879	1.01056	1.03945	1.02757	1.10952	-0.0854085	-0.0850951	-0.0833689	-0.0810232	-0.134476	-0.144282	-0.147264	0.0220891	0.0141226
Tolg_1	0.00892651	0.0160886	-0.0096736	0.0158766	0.0232703	0.104723	0.108465	0.0829025	0.0551932	0.0591007	0.0385939	0.0198465	0.021028	-0.000722223	-0.00050228	-0.0121637	-0.00742134	-0.00156269	0.00504125	0.00162414	0.0407388	0.0416174	0.0382557	0.11185	0.111813	0.119974	0.136888	0.136867	0.140433	-0.0340161	-0.037184	-0.0578799	0.112546	0.112037	0.111031	0.119242	-0.0687661	-0.077999	-0.0784099	-0.0854085	0.726161	0.69226	0.694825	0.698322	0.166462	0.16498	0.17187	0.0660628	0.0672381
Tolg_2	0.00835584	0.0147267	-0.00636445	0.0160471	0.0218312	0.103056	0.108828	0.0811036	0.0536883	0.0591545	0.0355967	0.0167211	0.0220004	0.00155396	-0.0111253	-0.0213791	-0.0207601	0.0010712	0.00858959	-0.000559936	0.0375581	0.0401125	0.0344474	0.115579	0.114793	0.12558	0.138064	0.138227	0.143989	-0.0335334	-0.0350304	-0.0573507	0.103484	0.110186	0.107736	0.11809	-0.0770137	-0.0824201	-0.0826871	-0.0850951	0.69226	0.729076	0.699939	0.704204	0.172254	0.166547	0.177559	0.062451	0.0640157
Tolg_3	0.0120182	0.0169869	-0.00736821	0.0165987	0.0199375	0.100585	0.106775	0.0849507	0.0572019	0.0649641	0.0389183	0.017817	0.0253998	0.00343125	-0.00758027	-0.0157495	-0.0163949	0.00605161	0.0134234	-0.000469103	0.040745	0.0453537	0.0408403	0.115899	0.112356	0.117572	0.13558	0.133126	0.142511	-0.037337	-0.0406754	-0.0587126	0.109429	0.110256	0.1109	0.114863	-0.0720242	-0.0755192	-0.0790399	-0.0833689	0.694825	0.699939	0.74067	0.711535	0.170126	0.166414	0.170735	0.0646652	0.0667138
Tolg_4	0.00496624	0.00764273	-0.00540642	0.0135084	0.0156242	0.100587	0.110272	0.0879304	0.0557085	0.0630466	0.0404962	0.0135199	0.0223635	0.00509261	-0.00379424	-0.0143636	-0.0135244	-0.0032879	0.00404244	-0.00516118	0.0387235	0.0423246	0.0374274	0.119433	0.113742	0.123105	0.138739	0.136389	0.144473	-0.0375294	-0.0387228	-0.0568965	0.108702	0.11049	0.111668	0.122008	-0.0698101	-0.0761688	-0.0805829	-0.0810232	0.698322	0.704204	0.711535	0.743058	0.175478	0.172369	0.178582	0.064884	0.0659882
Tossi_1	-0.0684184	-0.0413073	0.0266966	-0.0522328	-0.0550167	0.0723357	0.0709827	0.115683	0.0295434	0.0363182	0.0916228	-0.0472506	-0.0425439	0.00385069	-0.0650551	-0.0698871	-0.0679832	0.0551109	0.0576337	0.0516352	0.0985093	0.111989	0.100244	0.180421	0.16999	0.0974475	0.0971309	0.103296	0.108052	0.165366	0.154929	0.230312	0.0603193	0.0605973	0.070129	0.0724197	-0.141581	-0.144496	-0.141091	-0.134476	0.166462	0.172254	0.170126	0.175478	0.780037	0.69597	0.689645	0.0393447	0.0355621
Tossi_2	-0.0862391	-0.0551114	0.0542151	-0.0632727	-0.0648493	0.0658837	0.0662157	0.139971	0.0182446	0.0259086	0.103679	-0.0592622	-0.0602312	0.0203022	-0.0661132	-0.0690287	-0.0637126	0.0447747	0.0471876	0.0433477	0.106038	0.137651	0.121347	0.203354	0.201443	0.104235	0.109864	0.111991	0.11591	0.148932	0.146421	0.251615	0.0629696	0.0669666	0.0707112	0.07147	-0.151213	-0.153293	-0.153536	-0.144282	0.16498	0.166547	0.166414	0.172369	0.69597	0.827019	0.724273	0.028693	0.0309975
Tossi_3	-0.078841	-0.0488893	0.0316978	-0.0565156	-0.0608317	0.0646312	0.0705468	0.129376	0.0141334	0.021452	0.088353	-0.0579655	-0.0537066	0.0105074	-0.0611093	-0.0682228	-0.0640859	0.0411982	0.0463039	0.0416034	0.0921497	0.113682	0.0973789	0.191957	0.186879	0.104361	0.109826	0.113953	0.117964	0.159613	0.151671	0.24247	0.0639355	0.0630221	0.0726502	0.0740111	-0.150841	-0.153407	-0.152662	-0.147264	0.17187	0.177559	0.170735	0.178582	0.689645	0.724273	0.789051	0.0269278	0.0272622
Gorv_1	-0.0959407	-0.0960179	-0.136339	-0.0946774	-0.09829	0.04848	0.05769	0.0315823	0.52673	0.524678	0.532833	-0.099171	-0.103734	-0.128362	-0.0342924	-0.0349562	-0.0357921	0.170851	0.174337	0.172929	0.529858	0.53202	0.527604	0.0285206	0.0274771	0.0377589	0.0468355	0.0449825	0.0463119	-0.119343	-0.113901	-0.15494	0.0497709	0.0549325	0.0556916	0.0562624	0.0209063	0.0145712	0.0195141	0.0220891	0.0660628	0.062451	0.0646652	0.064884	0.0393447	0.028693	0.0269278	0.607072	0.568832
Gorv_2	-0.101332	-0.0965695	-0.138367	-0.0990607	-0.101392	0.0541853	0.0575204	0.0406324	0.525592	0.521275	0.540768	-0.102888	-0.109231	-0.129718	-0.026006	-0.0282424	-0.0288614	0.163022	0.165425	0.169912	0.531744	0.533574	0.53142	0.0332476	0.0347679	0.043347	0.0593312	0.0550033	0.0552102	-0.125702	-0.116797	-0.157758	0.0594476	0.0626986	0.0673483	0.0653124	0.012584	0.0128274	0.0117111	0.0141226	0.0672381	0.0640157	0.0667138	0.0659882	0.0355621	0.0309975	0.0272622	0.568832	0.598652
Gorv_3	-0.10248	-0.10232	-0.143127	-0.099903	-0.0967223	0.0478698	0.0577888	0.0424245	0.515052	0.516468	0.537154	-0.101628	-0.114751	-0.13556	-0.0221056	-0.0168168	-0.0127967	0.158188	0.162786	0.167235	0.522834	0.523095	0.528516	0.0263447	0.0234064	0.0421111	0.0663791	0.0593752	0.0484682	-0.120468	-0.113611	-0.153057	0.0741195	0.0794393	0.0619421	0.0604283	0.0202513	0.00298618	0.00529376	0.0176516	0.0670139	0.0675631	0.0734268	0.0654068	0.0362308	0.0378264	0.026099	0.55531	0.561217
Gorv_5	-0.104057	-0.102138	-0.136631	-0.103976	-0.102536	0.0566145	0.0580235	0.055555	0.513831	0.511469	0.538741	-0.102481	-0.115834	-0.129913	-0.0359993	-0.0282275	-0.0246861	0.169586	0.170387	0.170334	0.527176	0.525786	0.530573	0.0210161	0.0220956	0.0366666	0.0627269	0.0541525	0.0438339	-0.124136	-0.114308	-0.147899	0.0786297	0.0812667	0.0751273	0.0710671	0.0152	0.00543796	0.00510035	0.0197757	0.065576	0.0585045	0.0673808	0.063416	0.0386653	0.0420427	0.0316435	0.553348	0.56324
Lomash_1	-0.202183	-0.192902	-0.278615	-0.215567	-0.241755	0.0780237	0.0797504	0.0708218	0.0645766	0.0711527	0.0616514	-0.236101	-0.241563	-0.267111	0.117619	0.117249	0.110157	-0.120889	-0.114485	-0.116846	0.0539484	0.0504974	0.0506974	0.0599855	0.0537909	0.0710282	0.0845616	0.0713589	0.0805542	-0.142461	-0.142603	-0.17684	0.0918226	0.0867364	0.0879705	0.0895818	-0.0284565	-0.0378299	-0.0355773	-0.0343507	0.121343	0.121549	0.12274	0.124668	0.088101	0.0882653	0.0928894	0.0762955	0.0809423
Lomash_2	-0.202999	-0.195413	-0.279915	-0.210325	-0.237162	0.0876389	0.081131	0.0739301	0.0671221	0.0686478	0.05779	-0.227423	-0.236937	-0.265318	0.111543	0.113776	0.113549	-0.119922	-0.11423	-0.110276	0.0529981	0.0458286	0.0483798	0.0532538	0.0501343	0.0733162	0.0823307	0.0731408	0.0715502	-0.132263	-0.130169	-0.16802	0.0971737	0.0888034	0.0906486	0.0941727	-0.0321214	-0.045537	-0.0419072	-0.0432511	0.122333	0.122356	0.122544	0.125417	0.0875689	0.0901312	0.0912369	0.0717678	0.0786138
Lomash_3	-0.20207	-0.191147	-0.27588	-0.21089	-0.23212	0.0861192	0.0842862	0.0746753	0.065196	0.0671542	0.0535315	-0.227692	-0.23588	-0.263054	0.118321	0.120498	0.113791	-0.120786	-0.112978	-0.110418	0.0471289	0.0428689	0.045895	0.0534977	0.0511083	0.0792759	0.084634	0.0747238	0.0760625	-0.137473	-0.14014	-0.18201	0.0969054	0.0927632	0.0913976	0.0916925	-0.0316604	-0.042801	-0.0394876	-0.0394524	0.126174	0.123359	0.127449	0.12786	0.0901629	0.0874273	0.0902285	0.0740708	0.0777957
Lomash_4	-0.204119	-0.194772	-0.278489	-0.213712	-0.234399	0.0914188	0.0872946	0.0853469	0.0582421	0.0609406	0.0643917	-0.233319	-0.240309	-0.264373	0.110669	0.121457	0.121301	-0.119511	-0.11464	-0.112999	0.0504759	0.0463451	0.0489456	0.0575531	0.0565387	0.0827548	0.0938731	0.0833402	0.0805441	-0.147085	-0.146625	-0.180228	0.112317	0.110718	0.100466	0.103761	-0.0252721	-0.0418133	-0.0378943	-0.0406613	0.119754	0.119459	0.120475	0.125512	0.0892756	0.0924736	0.0932914	0.0736818	0.0794039
Lomash_5	-0.208175	-0.198845	-0.280399	-0.217545	-0.238827	0.0925614	0.0897108	0.0879169	0.0610454	0.066219	0.0674377	-0.24018	-0.243408	-0.26729	0.107343	0.119971	0.120272	-0.124319	-0.117018	-0.118724	0.0547964	0.0496102	0.0516959	0.0616416	0.0580438	0.080224	0.0996614	0.0858726	0.0830839	-0.140295	-0.145932	-0.174751	0.112974	0.107031	0.105741	0.106389	-0.025975	-0.0411916	-0.042036	-0.0384957	0.125223	0.122969	0.126057	0.133037	0.0901907	0.0955793	0.0979304	0.0774545	0.0830505
Nadg_1	-0.0413752	-0.0334391	-0.0776517	-0.0483173	-0.0419175	0.141737	0.14752	0.118912	0.182295	0.174894	0.162909	-0.042721	-0.0448219	-0.068605	0.022307	0.0233852	0.0259565	0.00583228	0.0262158	0.0114431	0.163525	0.16438	0.166424	0.140805	0.125377	0.131005	0.143484	0.147043	0.154006	-0.0930195	-0.0946775	-0.124751	0.141975	0.152486	0.148992	0.15098	-0.0116951	-0.0183135	-0.0185258	-0.0162671	0.175029	0.164699	0.169364	0.170942	0.104244	0.106524	0.103475	0.189746	0.187299
Nadg_2	-0.0469849	-0.036679	-0.0755285	-0.0508813	-0.0407108	0.142949	0.143263	0.126105	0.17762	0.172881	0.167159	-0.0446184	-0.0438713	-0.0657818	0.020066	0.0172083	0.0210053	0.00272602	0.0228395	0.00976363	0.163749	0.16246	0.163801	0.141932	0.126355	0.133388	0.146953	0.146234	0.150118	-0.090157	-0.0878613	-0.117657	0.142854	0.152334	0.155296	0.149218	-0.00547768	-0.00678845	-0.00845479	-0.005409	0.170497	0.165122	0.172667	0.172517	0.104673	0.115104	0.109773	0.187151	0.189767
Nadg_3	-0.0448827	-0.0359541	-0.0770191	-0.0437087	-0.0360802	0.140501	0.137188	0.117834	0.175788	0.169855	0.162609	-0.03843	-0.0411611	-0.0653111	0.0280191	0.0275695	0.0296041	-0.000590796	0.0187458	0.0121288	0.16256	0.162311	0.160141	0.141212	0.129009	0.137454	0.147206	0.152482	0.154431	-0.0932882	-0.0955058	-0.122895	0.144502	0.15047	0.147903	0.144966	-0.0051358	-0.00932382	-0.00785373	-0.0113603	0.170558	0.165602	0.168923	0.166854	0.0996211	0.10736	0.104516	0.188487	0.193232
Nadg_4	-0.0544104	-0.0439332	-0.0836304	-0.0571321	-0.0460001	0.13727	0.134951	0.131072	0.177893	0.17062	0.172202	-0.0521854	-0.057255	-0.0754342	0.0188016	0.031	0.0376123	0.0104875	0.0272742	0.0217922	0.171372	0.165342	0.174214	0.138543	0.127814	0.138137	0.156276	0.155907	0.145463	-0.0987845	-0.0984798	-0.123249	0.155373	0.163434	0.149024	0.148299	-0.00257377	-0.0171367	-0.0186041	-0.0132857	0.163735	0.155974	0.158912	0.163945	0.102334	0.115677	0.107736	0.185941	0.188251
Nadg_5	-0.05063	-0.0405418	-0.0801425	-0.0507163	-0.0424757	0.14062	0.139928	0.126445	0.176322	0.169414	0.172667	-0.0453933	-0.0537257	-0.0693381	0.0152121	0.0295281	0.0371245	0.00559171	0.0239869	0.0224999	0.168582	0.165605	0.169253	0.138419	0.128929	0.138999	0.157816	0.16546	0.150504	-0.101104	-0.0987715	-0.125968	0.166667	0.169076	0.150343	0.15133	-0.00816641	-0.0193157	-0.0207053	-0.0204755	0.166751	0.157073	0.163324	0.161638	0.104415	0.115208	0.10913	0.183691	0.187652
Agl_1	0.0699495	0.0715154	0.0795209	0.0853131	0.106913	0.0776734	0.0780103	0.0462928	0.0101803	-0.00264345	-0.0234084	0.0925136	0.0905308	0.0846556	-0.0524133	-0.0592193	-0.0585165	-0.00243194	-0.000199373	0.00747991	-0.00714841	-0.0172833	-0.0155475	0.0486787	0.0575317	0.0739579	0.0701247	0.0767593	0.0809837	-0.0882721	-0.0866771	-0.104518	0.0667386	0.0713692	0.0782752	0.0807376	-0.0913575	-0.0879466	-0.0870171	-0.0898165	0.155041	0.157029	0.154239	0.152361	0.0346277	0.0309692	0.0380475	0.0148396	0.0117632
Agl_2	0.0654671	0.0669123	0.0771304	0.0860313	0.109797	0.0803168	0.0762938	0.04592	-0.00141952	-0.0137966	-0.028949	0.0948047	0.0888516	0.0824904	-0.0451012	-0.0521377	-0.0519966	-0.0141125	-0.0122917	0.00451137	-0.0159493	-0.0263012	-0.0206133	0.0470584	0.0588735	0.0817641	0.0750569	0.0788296	0.0830547	-0.0858765	-0.0902416	-0.105213	0.0757429	0.0770843	0.0792501	0.0806558	-0.094736	-0.0897033	-0.0916092	-0.0943453	0.156389	0.154494	0.153177	0.150724	0.0380431	0.0310708	0.0427497	0.0104099	0.00718375
Agl_3	0.0638379	0.0702679	0.0777801	0.0895228	0.109895	0.0761376	0.068452	0.03732	0.00521039	-0.0111228	-0.0227455	0.0946513	0.0915547	0.0812532	-0.049582	-0.0558036	-0.0562519	-0.0112338	-0.00839714	0.0131305	-0.0108968	-0.0210213	-0.0190889	0.0467653	0.0595888	0.0817475	0.0727364	0.0785595	0.0769706	-0.0831688	-0.081226	-0.100278	0.0663863	0.0671846	0.0718122	0.0728221	-0.0901856	-0.0871106	-0.0848773	-0.0946035	0.151764	0.150362	0.146356	0.145247	0.0334075	0.0252468	0.0374355	0.015237	0.0080926
Agl_4	0.0590498	0.0644589	0.0812759	0.0836552	0.120522	0.0762371	0.0718258	0.0524392	0.00195291	-0.0147872	-0.0192809	0.090158	0.0857088	0.0848982	-0.0434099	-0.0433671	-0.0421095	-0.00769886	-0.00687703	0.00941727	-0.0107972	-0.0210557	-0.0153009	0.0398427	0.0537601	0.0833121	0.0812106	0.0857182	0.0745435	-0.0851334	-0.0871851	-0.0991847	0.081362	0.0830596	0.0810827	0.0834242	-0.0907859	-0.094926	-0.0946945	-0.0987117	0.155679	0.155351	0.153918	0.153193	0.0338419	0.0347294	0.0412318	0.0126981	0.0116266
DelMad_1	-0.0577433	-0.0347988	-0.0938909	-0.0603208	-0.0717425	0.118378	0.126706	0.107358	0.0466508	0.0468429	0.0282853	-0.0589238	-0.0664565	-0.0918479	-0.0458576	-0.0468419	-0.0538489	0.0466961	0.0580601	0.034092	0.0328562	0.0292975	0.0264587	0.534798	0.538456	0.526405	0.548763	0.537519	0.567345	-0.0587063	-0.047473	-0.0764702	0.111331	0.115025	0.117559	0.116191	-0.0903509	-0.0887374	-0.0891237	-0.085479	0.121374	0.124546	0.124271	0.129493	0.111024	0.112719	0.114168	0.0435115	0.0468941
DelMad_2	-0.064968	-0.0325538	-0.0921602	-0.0634316	-0.0752136	0.11722	0.128261	0.108567	0.0564809	0.0520191	0.0404008	-0.0618534	-0.0703772	-0.0926107	-0.0469014	-0.0470336	-0.0527146	0.0264356	0.0390255	0.0206707	0.0337051	0.0331271	0.0356663	0.536643	0.543755	0.530735	0.555656	0.542198	0.574586	-0.0685693	-0.0628287	-0.0864522	0.117886	0.120637	0.120171	0.123409	-0.0851585	-0.0878128	-0.0885688	-0.0864919	0.129683	0.136118	0.136035	0.139227	0.113534	0.112749	0.117269	0.0507089	0.0560396
DelMad_3	-0.0625905	-0.0312574	-0.0908284	-0.0600725	-0.0737532	0.115933	0.128114	0.10434	0.0397165	0.0382775	0.022867	-0.0615032	-0.0671676	-0.0891684	-0.0470797	-0.0481675	-0.0534199	-0.00320327	0.00950424	-0.00459585	0.0169028	0.0136199	0.0141239	0.516912	0.521303	0.510976	0.534951	0.525974	0.553309	-0.0367771	-0.0300433	-0.0515475	0.110704	0.114336	0.120296	0.118402	-0.092535	-0.0900302	-0.0908125	-0.0893395	0.11898	0.123111	0.123362	0.129212	0.104994	0.111426	0.116972	0.034873	0.0412449
Niki_29_1	0.199553	0.172974	0.244558	0.248017	0.247044	-0.154257	-0.153644	-0.176622	-0.207796	-0.204422	-0.249638	0.260898	0.273194	0.247753	-0.117135	-0.119994	-0.126361	-0.0677198	-0.0815274	-0.0647267	-0.240983	-0.258162	-0.247439	-0.172216	-0.171916	-0.148214	-0.157488	-0.15078	-0.147465	0.211043	0.20864	0.193315	-0.162062	-0.165177	-0.155531	-0.156365	0.0547793	0.0631419	0.0594471	0.0625224	-0.157282	-0.150947	-0.152825	-0.152865	-0.212975	-0.220368	-0.201254	-0.228955	-0.23308
Niki_29_2	0.192702	0.164476	0.242325	0.253362	0.247931	-0.155276	-0.158628	-0.175547	-0.205191	-0.197977	-0.246363	0.257912	0.276179	0.249647	-0.113593	-0.119141	-0.127621	-0.068961	-0.0840408	-0.062736	-0.2383	-0.253404	-0.247693	-0.168636	-0.170635	-0.147387	-0.157449	-0.151683	-0.151672	0.215299	0.211216	0.198867	-0.165309	-0.171415	-0.156699	-0.158186	0.0692914	0.0736502	0.07041	0.075378	-0.154383	-0.145924	-0.148033	-0.144684	-0.204238	-0.213474	-0.194667	-0.224995	-0.229722
Niki_33_1	-0.00217638	-0.0422854	-0.0418888	-0.0115253	-0.0198717	-0.165357	-0.166006	-0.168393	-0.186635	-0.178772	-0.201166	-0.0147049	-0.0112313	-0.032174	-0.0839147	-0.0804152	-0.085753	-0.0809603	-0.0859033	-0.0858811	-0.205977	-0.214607	-0.209441	-0.219262	-0.221169	-0.185409	-0.187269	-0.182104	-0.191846	0.0689768	0.0641623	0.053662	-0.143196	-0.151191	-0.151934	-0.155562	0.0723502	0.0864746	0.0816812	0.071072	-0.195481	-0.199357	-0.191428	-0.190797	-0.145867	-0.173728	-0.155994	-0.190915	-0.191348
Niki_33_2	0.000302045	-0.0404576	-0.0416828	-0.00638256	-0.0144535	-0.159274	-0.165782	-0.173349	-0.184539	-0.175684	-0.199178	-0.0112429	-0.00946289	-0.0336819	-0.0883754	-0.0862152	-0.0880733	-0.0823092	-0.0855945	-0.0830753	-0.200066	-0.213649	-0.206618	-0.220962	-0.223188	-0.184776	-0.186558	-0.181347	-0.189726	0.0700597	0.063323	0.0502705	-0.142174	-0.149498	-0.15398	-0.156814	0.0729336	0.0860195	0.0797734	0.0706946	-0.189771	-0.196125	-0.192304	-0.192965	-0.140306	-0.172824	-0.155902	-0.189296	-0.187412
Niki_35_1	-0.0354781	-0.0510599	-0.0879217	-0.0499946	-0.0545647	-0.0316284	-0.0408637	-0.0486456	-0.148343	-0.145618	-0.179994	-0.0463624	-0.0580224	-0.0716449	-0.105765	-0.101701	-0.105688	-0.051087	-0.0627927	-0.0468474	-0.174964	-0.186332	-0.181032	-0.0803779	-0.0911422	-0.066788	-0.0704785	-0.0707114	-0.066479	0.320819	0.308066	0.311668	-0.032628	-0.0389349	-0.0322528	-0.0335418	0.045022	0.053478	0.0489164	0.0541411	-0.0373315	-0.0372887	-0.0357832	-0.0387882	0.119533	0.123319	0.126634	-0.161879	-0.160463
Niki_35_2	-0.0324995	-0.0517103	-0.0872424	-0.0510317	-0.0544943	-0.0232768	-0.0352776	-0.0496893	-0.149428	-0.140321	-0.180411	-0.0447326	-0.057568	-0.0689492	-0.104239	-0.10172	-0.104949	-0.0494765	-0.059021	-0.0477625	-0.178699	-0.190264	-0.186465	-0.0783953	-0.0893779	-0.0672543	-0.06805	-0.0716657	-0.0667228	0.322435	0.311766	0.307401	-0.0305061	-0.0332713	-0.0299002	-0.0296656	0.0482033	0.0526879	0.0506237	0.0528934	-0.0261944	-0.0223734	-0.0262784	-0.0250844	0.123278	0.123519	0.131395	-0.163319	-0.159779
Asco_2	0.178517	0.190542	0.227738	0.220351	0.239253	-0.0189878	-0.0134663	-0.0500295	-0.0912847	-0.0859749	-0.12288	0.236849	0.249256	0.232249	-0.0336487	-0.0398756	-0.0366007	0.339734	0.331916	0.347844	-0.120116	-0.129517	-0.122403	-0.0341227	-0.0305296	0.000362631	-0.0212971	-0.0190005	-0.0141817	0.0457294	0.0380695	0.0289947	-0.0248749	-0.0242988	-0.0307048	-0.0243178	-0.0864637	-0.084177	-0.0841373	-0.0816874	0.0263937	0.0269693	0.0184207	0.0251503	0.0351079	0.0302765	0.0408042	-0.0993974	-0.106372
Asco_4	0.158695	0.17386	0.369708	0.204567	0.231029	-0.0462943	-0.043949	0.0146407	-0.129511	-0.121183	-0.0591945	0.222226	0.233793	0.323663	-0.0615979	-0.0660337	-0.0632362	0.311963	0.301941	0.324036	-0.065362	-0.0340378	-0.0518205	0.0388345	0.0430155	-0.0301511	-0.0453762	-0.0416785	-0.0416891	0.0161195	0.00175054	0.120764	-0.0478882	-0.0475997	-0.0537072	-0.0489004	-0.107827	-0.108518	-0.11168	-0.107394	-0.00548341	-0.00276521	-0.00731381	0.000107172	0.106102	0.141351	0.123591	-0.134988	-0.137687
ChernRan_1	-0.0511931	-0.08218	-0.0330445	-0.0719653	-0.0782168	-0.0793752	-0.0970845	-0.0685901	-0.155396	-0.159579	-0.13457	-0.0680487	-0.0676039	-0.0473372	-0.101608	-0.103995	-0.0983215	-0.066569	-0.07267	-0.0600223	-0.115494	-0.112532	-0.121002	-0.0372712	-0.038756	-0.0781626	-0.0856542	-0.0836111	-0.0876787	0.246916	0.256935	0.308387	-0.105305	-0.104845	-0.0987354	-0.101061	-0.0248807	-0.0173815	-0.0143498	-0.0255959	-0.0495048	-0.0441086	-0.053596	-0.0545136	0.180544	0.185733	0.186915	-0.170881	-0.171729
ChernRan_2	-0.0612932	-0.0913899	0.00105695	-0.0776451	-0.0865906	-0.0938281	-0.106391	-0.055404	-0.178953	-0.176563	-0.120649	-0.079068	-0.082516	-0.0259568	-0.114673	-0.11346	-0.109684	-0.0752421	-0.0869206	-0.0796022	-0.122363	-0.0941284	-0.107508	-0.0148543	-0.0108433	-0.0851534	-0.0958484	-0.0896571	-0.0922854	0.246211	0.246615	0.342402	-0.115822	-0.111406	-0.110457	-0.108605	-0.0292288	-0.0225293	-0.0184195	-0.0271511	-0.0518913	-0.0499487	-0.0576452	-0.058171	0.214291	0.234546	0.225455	-0.189691	-0.19547
ChernRan_3	-0.0535722	-0.0812747	-0.00900383	-0.0696629	-0.0752131	-0.0856874	-0.101085	-0.0646645	-0.174853	-0.16947	-0.132552	-0.067004	-0.0697749	-0.0233769	-0.114462	-0.111785	-0.106591	-0.0633765	-0.0770168	-0.0668864	-0.1281	-0.108	-0.118258	-0.0309741	-0.0252359	-0.0823534	-0.0914447	-0.0880823	-0.0956232	0.241881	0.246453	0.317241	-0.108474	-0.102286	-0.104725	-0.103498	-0.0423863	-0.035922	-0.0337373	-0.0425732	-0.0475834	-0.0430524	-0.0519425	-0.0545877	0.197755	0.215107	0.207082	-0.181706	-0.18338
Guk_2	-0.13438	-0.103463	-0.165179	-0.136045	-0.139442	-0.0861674	-0.0836943	-0.100466	-0.0902348	-0.093733	-0.118488	-0.142807	-0.139587	-0.163469	0.140154	0.14469	0.140846	-0.10032	-0.0896804	-0.103045	-0.115429	-0.126792	-0.118504	-0.0784098	-0.0786099	-0.0530862	-0.0608726	-0.0652073	-0.0592091	-0.168364	-0.175232	-0.206829	-0.0906399	-0.089296	-0.0934096	-0.0931711	-0.131761	-0.142588	-0.138563	-0.136924	-0.0583924	-0.0562793	-0.0545124	-0.0531265	-0.0461718	-0.057219	-0.0474631	-0.0977543	-0.102617
Guk_4	-0.138671	-0.111245	-0.183598	-0.131958	-0.139006	-0.0760395	-0.0847492	-0.101725	-0.0842917	-0.081788	-0.1086	-0.143917	-0.143943	-0.174165	0.135431	0.139712	0.140686	-0.114073	-0.10619	-0.0960066	-0.110503	-0.117173	-0.11246	-0.0848418	-0.0810218	-0.0465273	-0.0571674	-0.0598962	-0.0608249	-0.173552	-0.173223	-0.219206	-0.0835683	-0.0814919	-0.0872965	-0.0883248	-0.117385	-0.12875	-0.127005	-0.124478	-0.0494795	-0.0434453	-0.0487625	-0.0505545	-0.0469768	-0.0593893	-0.0496019	-0.0841181	-0.0866776
Guk_5	-0.131211	-0.10684	-0.172122	-0.124788	-0.135951	-0.07538	-0.0840004	-0.097715	-0.0946257	-0.0974022	-0.12176	-0.135897	-0.137937	-0.168861	0.149954	0.149203	0.147766	-0.114222	-0.103954	-0.0980976	-0.119086	-0.133041	-0.125678	-0.076693	-0.0764638	-0.0420803	-0.0510428	-0.051797	-0.0505377	-0.170372	-0.171935	-0.219045	-0.077472	-0.0819472	-0.0868542	-0.0867529	-0.122869	-0.131242	-0.122974	-0.129804	-0.0603193	-0.0579624	-0.0584152	-0.0569727	-0.0534473	-0.0686647	-0.0582432	-0.097021	-0.100971
Ispan_1	-0.0566334	-0.0569808	-0.119292	-0.0405293	-0.0826457	-0.0538879	-0.0570921	-0.0781413	-0.0506596	-0.0520249	-0.0757366	-0.0778994	-0.0856304	-0.111597	-0.0247784	-0.021302	-0.0140167	-0.0717178	-0.0678819	-0.0544953	-0.0725734	-0.0774772	-0.0744559	0.0747518	0.0781301	0.108621	0.102582	0.0996519	0.0934411	-0.0619388	-0.0499749	-0.0906809	-0.0595027	-0.053802	-0.0632182	-0.0622657	0.0134317	0.00683929	0.0102836	0.00316799	-0.0362529	-0.0303131	-0.0314236	-0.0330436	-0.062774	-0.0738328	-0.0703657	-0.0537429	-0.0565659
Ispan_2	-0.068723	-0.0552007	-0.118072	-0.0382162	-0.0796084	-0.0488969	-0.0558352	-0.08034	-0.0487304	-0.0553502	-0.0754636	-0.0723866	-0.0825186	-0.10761	-0.0123619	-0.00893744	-0.00443435	-0.0494043	-0.0453405	-0.0352588	-0.07176	-0.0794961	-0.0757763	0.0912074	0.103408	0.130821	0.12181	0.122744	0.115071	-0.0500124	-0.0466802	-0.0880375	-0.057087	-0.0550615	-0.0640089	-0.0651496	0.0153369	0.0133455	0.0174885	0.0142135	-0.0213503	-0.0176611	-0.0232961	-0.0220109	-0.046839	-0.0504057	-0.0498315	-0.0520322	-0.0524941
Ispan_3	-0.0279768	-0.0193766	-0.0653059	-0.0240682	-0.0384324	0.000247679	-0.00794186	-0.0243533	-0.00445693	-0.017113	-0.0237393	-0.0380319	-0.0429896	-0.0654658	-0.00864544	-0.00734791	-0.00421114	-0.0153147	-0.00334201	-0.00577754	-0.0244301	-0.0292848	-0.0261701	0.0426838	0.0420458	0.0646959	0.0649129	0.0667288	0.057848	-0.0464174	-0.0454603	-0.0748655	-0.00363785	-0.00673347	-0.012081	-0.00964553	-0.00207713	-0.00889502	-0.00380847	-0.00661945	-0.00356127	-0.00678744	-0.00963103	-0.00997002	-0.0279747	-0.0285354	-0.0309233	-0.0086181	-0.0108679
Kali_1	-0.072472	-0.072484	-0.158178	-0.111201	-0.128013	-0.0497941	-0.041601	-0.067337	-0.0319093	-0.0319155	-0.0630384	-0.119259	-0.123459	-0.147063	0.340774	0.337337	0.328672	-0.0511222	-0.0482763	-0.0781977	-0.0606027	-0.0665509	-0.0651705	-0.0714194	-0.0850741	-0.0630786	-0.059735	-0.0616036	-0.0602814	-0.126975	-0.136391	-0.169128	-0.055643	-0.0554976	-0.0504711	-0.0555343	-0.116993	-0.115992	-0.116597	-0.116893	-0.0225235	-0.0209249	-0.0221252	-0.0208015	-0.0845458	-0.0833116	-0.0827112	-0.0453636	-0.0464749
Kali_2	-0.0724087	-0.0748209	-0.164213	-0.113693	-0.131521	-0.0409216	-0.0337427	-0.0615192	-0.044694	-0.0406421	-0.074324	-0.120388	-0.122396	-0.155857	0.328141	0.324241	0.318333	-0.0647378	-0.0573751	-0.0828589	-0.07218	-0.0759737	-0.0786619	-0.0809333	-0.0937515	-0.0708947	-0.0664037	-0.0700231	-0.0696539	-0.111317	-0.1213	-0.152581	-0.0473255	-0.0462872	-0.0424731	-0.0433841	-0.10367	-0.102539	-0.106748	-0.10666	-0.0245415	-0.0212124	-0.0222465	-0.02395	-0.0801691	-0.0893877	-0.0830911	-0.0556326	-0.0594224
Kali_3	-0.069753	-0.0685085	-0.158291	-0.109763	-0.125773	-0.0524591	-0.0444862	-0.0667349	-0.0451753	-0.0480532	-0.0762232	-0.117457	-0.119671	-0.146711	0.326524	0.32608	0.318177	-0.0520783	-0.0520724	-0.0822492	-0.0772972	-0.0784225	-0.0797023	-0.0828203	-0.0977722	-0.0765608	-0.0701366	-0.0720415	-0.0708485	-0.0997235	-0.105711	-0.140893	-0.0562624	-0.0562468	-0.0518462	-0.0554791	-0.111511	-0.111109	-0.113096	-0.111774	-0.0193384	-0.0193703	-0.0177562	-0.0192374	-0.0770762	-0.0808642	-0.0818443	-0.0586882	-0.0593298
Koker_1	-0.145202	-0.115396	-0.174645	-0.133012	-0.132501	-0.0807456	-0.0877476	-0.100013	-0.107865	-0.110758	-0.125712	-0.144026	-0.149101	-0.166933	0.155398	0.160328	0.164336	-0.123024	-0.116296	-0.105935	-0.129095	-0.139318	-0.131416	-0.0890668	-0.0851649	-0.0489344	-0.0491375	-0.0550627	-0.0598502	-0.178446	-0.184338	-0.220875	-0.07561	-0.0812923	-0.0883744	-0.0887453	-0.120573	-0.132438	-0.133979	-0.132703	-0.0593716	-0.0564816	-0.0578243	-0.0555357	-0.0528801	-0.0656988	-0.0540662	-0.102116	-0.102709
Koker_2	-0.148776	-0.117962	-0.176251	-0.137698	-0.138348	-0.0856838	-0.0881439	-0.100147	-0.104004	-0.105962	-0.121759	-0.147263	-0.152421	-0.169079	0.157454	0.16556	0.169899	-0.126477	-0.115937	-0.107396	-0.128361	-0.13655	-0.128448	-0.0874254	-0.0834525	-0.0450582	-0.048389	-0.0516236	-0.0590558	-0.178011	-0.188336	-0.22202	-0.0763669	-0.0748803	-0.0861424	-0.090575	-0.124347	-0.135068	-0.135442	-0.131599	-0.0587101	-0.0582276	-0.0572095	-0.0544799	-0.0546017	-0.0621471	-0.0520842	-0.101689	-0.101011
Koker_3	-0.14947	-0.118689	-0.177223	-0.1374	-0.133808	-0.0809254	-0.0866073	-0.0973956	-0.100216	-0.104345	-0.119242	-0.146475	-0.151311	-0.169391	0.151724	0.157161	0.159756	-0.118346	-0.109774	-0.103083	-0.123456	-0.134404	-0.123129	-0.0872895	-0.0823664	-0.0494158	-0.052256	-0.0580804	-0.0619254	-0.182979	-0.193116	-0.228494	-0.0728637	-0.0773921	-0.0857093	-0.0890891	-0.122648	-0.133149	-0.129254	-0.130013	-0.0549353	-0.0554604	-0.0565878	-0.0542421	-0.0519183	-0.0625554	-0.0504496	-0.0967832	-0.095212
Koker_4	-0.147065	-0.115991	-0.173666	-0.134574	-0.13986	-0.0863272	-0.0854874	-0.101512	-0.106002	-0.108409	-0.130074	-0.144298	-0.1468	-0.166118	0.153166	0.154092	0.152213	-0.12021	-0.112323	-0.110706	-0.13049	-0.139516	-0.134206	-0.0831344	-0.0795639	-0.0513627	-0.0569977	-0.0623541	-0.0557581	-0.17216	-0.180634	-0.219069	-0.0879232	-0.0901996	-0.0866969	-0.089924	-0.124333	-0.132015	-0.129726	-0.127728	-0.062573	-0.0568318	-0.058885	-0.0546197	-0.0499663	-0.0631812	-0.0518482	-0.10647	-0.110207
Kolh_2	0.00871829	-0.0220603	-0.0490425	-0.0133498	-0.0231062	-0.0609957	-0.0731475	-0.0939915	-0.103447	-0.0936962	-0.125154	-0.00178624	-0.0035772	-0.0373191	-0.112612	-0.123932	-0.114733	0.0055447	-0.00164235	0.0288959	-0.128036	-0.135129	-0.13326	-0.0749252	-0.0769652	-0.0681519	-0.0713851	-0.0543565	-0.0652161	0.327698	0.329062	0.30625	-0.0816481	-0.0813299	-0.0808962	-0.0808128	0.0274823	0.0303007	0.0337081	0.0247504	-0.0360986	-0.0262623	-0.029179	-0.0302075	0.148263	0.135113	0.150652	-0.113383	-0.119189
Kolh_3	-0.0231893	-0.051067	-0.0733891	-0.0394091	-0.0491205	-0.0470304	-0.0594196	-0.0730937	-0.0921268	-0.0828251	-0.111938	-0.033221	-0.0342952	-0.0637022	-0.11433	-0.125907	-0.113924	0.00247628	-0.00326452	0.0245639	-0.115642	-0.125048	-0.125271	-0.0672653	-0.0671001	-0.0501855	-0.0518706	-0.0483517	-0.0511282	0.296151	0.303453	0.279146	-0.0546386	-0.0583672	-0.0591188	-0.0616203	0.00867345	0.0155764	0.0160341	0.00915409	-0.0299787	-0.0257114	-0.024948	-0.0271283	0.13582	0.129068	0.137217	-0.10075	-0.10121
Nik_37_1	0.14845	0.12961	0.265832	0.176019	0.180533	-0.18953	-0.194377	-0.144072	-0.271998	-0.269874	-0.242322	0.179848	0.199535	0.249528	-0.11185	-0.112889	-0.115304	-0.102735	-0.113421	-0.0969586	-0.241519	-0.228607	-0.237262	-0.186753	-0.183554	-0.224056	-0.242089	-0.237228	-0.243193	0.192546	0.200388	0.26793	-0.199483	-0.205046	-0.197346	-0.193871	0.0111017	0.025156	0.0207206	0.0225645	-0.235565	-0.235452	-0.242425	-0.240033	-0.194137	-0.187522	-0.189784	-0.290655	-0.296904
Nik_37_2	0.136577	0.117094	0.29323	0.169729	0.177967	-0.203716	-0.20848	-0.150913	-0.283134	-0.284343	-0.237782	0.170791	0.190483	0.260179	-0.110866	-0.110988	-0.114833	-0.120216	-0.127826	-0.108146	-0.235739	-0.210568	-0.228204	-0.180801	-0.171724	-0.231586	-0.252403	-0.247615	-0.255257	0.193325	0.195886	0.294949	-0.210243	-0.216359	-0.210792	-0.210772	0.0166225	0.0280882	0.026462	0.0182074	-0.24392	-0.24516	-0.248895	-0.249475	-0.185124	-0.163227	-0.172667	-0.30194	-0.30778
Nik_37_3	0.142744	0.125198	0.283384	0.175807	0.184873	-0.20039	-0.203096	-0.148183	-0.281235	-0.280062	-0.244859	0.178784	0.196783	0.261211	-0.107216	-0.105539	-0.110969	-0.11565	-0.122505	-0.0992787	-0.247372	-0.230963	-0.240376	-0.185042	-0.181067	-0.228341	-0.247095	-0.243439	-0.248371	0.192425	0.199644	0.282522	-0.208233	-0.215658	-0.210632	-0.208885	0.0207988	0.0315458	0.0290655	0.0224848	-0.238131	-0.240377	-0.246909	-0.245591	-0.195502	-0.17705	-0.182021	-0.300061	-0.308123
Nisiot_1	-0.09575	-0.067173	-0.122149	-0.0674602	-0.081987	-0.0392904	-0.0500802	-0.0728434	-0.0899044	-0.0876642	-0.111725	-0.086036	-0.0931058	-0.112202	0.106704	0.107255	0.106484	-0.087971	-0.0867749	-0.0750476	-0.112025	-0.119163	-0.111105	-0.118749	-0.114778	-0.0772899	-0.0846039	-0.0880196	-0.0959784	-0.172175	-0.180567	-0.218476	-0.0475564	-0.0475112	-0.0471692	-0.0476578	-0.118312	-0.117993	-0.114507	-0.121535	-0.0880256	-0.0867027	-0.0917985	-0.0971097	-0.0906526	-0.098585	-0.0906943	-0.087656	-0.0851474
Nisiot_2	-0.102466	-0.0748268	-0.125039	-0.0662934	-0.0818587	-0.0434827	-0.0511923	-0.0733639	-0.0926715	-0.0877991	-0.112412	-0.0895222	-0.0962861	-0.115892	0.107772	0.109772	0.11143	-0.0857898	-0.0843333	-0.0734463	-0.109903	-0.120981	-0.109649	-0.117126	-0.114141	-0.074383	-0.0829166	-0.0882548	-0.0947762	-0.168456	-0.173448	-0.212907	-0.0482299	-0.0457423	-0.0511045	-0.0485341	-0.113423	-0.119683	-0.114716	-0.120196	-0.0877403	-0.0897991	-0.0935798	-0.098666	-0.0911555	-0.09654	-0.0885115	-0.0884766	-0.08859
Nisiot_3	-0.0978447	-0.0716381	-0.121045	-0.070257	-0.0826426	-0.04723	-0.0493016	-0.0707436	-0.0944016	-0.089639	-0.113193	-0.0926074	-0.0937163	-0.110447	0.109289	0.113312	0.111759	-0.0912799	-0.0871038	-0.0811225	-0.11182	-0.122395	-0.113347	-0.11341	-0.112936	-0.078299	-0.0802542	-0.0896277	-0.0942072	-0.171015	-0.177588	-0.213105	-0.0461394	-0.0444292	-0.0471584	-0.0468915	-0.11512	-0.11955	-0.114698	-0.11955	-0.0925133	-0.0898434	-0.0913207	-0.0978145	-0.0886576	-0.0951118	-0.0874352	-0.0897792	-0.0893115
Nisiot_5	-0.102894	-0.0724112	-0.120791	-0.0735713	-0.0869925	-0.0480333	-0.0517998	-0.0681572	-0.0861091	-0.0847332	-0.105616	-0.0904204	-0.096453	-0.111715	0.111927	0.113752	0.114863	-0.0850159	-0.0856358	-0.0786715	-0.102961	-0.113427	-0.103851	-0.109999	-0.114639	-0.0796873	-0.0794992	-0.0880705	-0.0926285	-0.180955	-0.185391	-0.222522	-0.0445223	-0.0454899	-0.0443801	-0.0450729	-0.113632	-0.116687	-0.11564	-0.118789	-0.0919807	-0.0910385	-0.0921318	-0.0965046	-0.0921923	-0.0942381	-0.0903597	-0.0861469	-0.0824453
Ofel_2	0.0304433	0.0395191	-0.0381772	-0.0249871	-0.0251626	-0.00235079	0.00958691	-0.00915341	-0.00387068	0.00206569	-0.0359151	-0.0183298	-0.010985	-0.0318846	-0.0710023	-0.0738239	-0.0713224	0.111055	0.119942	0.0657336	-0.026452	-0.028584	-0.0304213	-0.0324492	-0.036	-0.0171313	-0.0210416	-0.0151197	-0.0117665	-0.017644	-0.00793031	-0.0245254	-0.00355416	-0.000291343	0.00238948	0.0028958	-0.0523943	-0.0427946	-0.0418634	-0.0463872	-0.0447458	-0.0375935	-0.0388331	-0.0453173	-0.0853388	-0.0963337	-0.0936212	-0.00862246	-0.0107164
Ofel_3	0.0386379	0.0394275	-0.0205331	-0.0116871	-0.00350797	0.0052263	0.0134946	1.15851e-05	-0.0117418	-0.0103627	-0.0390948	-0.00638781	-0.00082443	-0.0147378	-0.0783207	-0.0812311	-0.0805419	0.110796	0.110023	0.0654829	-0.0383245	-0.0363671	-0.0362306	-0.0242824	-0.0233907	0.000245051	-0.00105817	0.00260598	0.00493886	-0.00205354	-0.00483301	-0.0217174	0.00629918	0.00826614	0.00836721	0.00906944	-0.049342	-0.0432678	-0.0413839	-0.0458951	-0.0307013	-0.0252767	-0.0286885	-0.0352389	-0.0729837	-0.0841673	-0.079606	-0.0130312	-0.0155568
Pian_1	-0.0564946	-0.0953455	-0.148244	-0.0965696	-0.115165	-0.265249	-0.268648	-0.279737	-0.265982	-0.248268	-0.282659	-0.121364	-0.125007	-0.140482	-0.0826675	-0.0817345	-0.074891	-0.198736	-0.209114	-0.200174	-0.287776	-0.297906	-0.288901	-0.313784	-0.306586	-0.268289	-0.275802	-0.268115	-0.287231	0.0725987	0.0648343	0.0514951	-0.247482	-0.257136	-0.263602	-0.265257	0.207111	0.206022	0.203663	0.191848	-0.256818	-0.259879	-0.260279	-0.259692	-0.275182	-0.297509	-0.284893	-0.264425	-0.263607
Pian_2	-0.0613114	-0.099549	-0.151629	-0.0948251	-0.111319	-0.258635	-0.269512	-0.279443	-0.2584	-0.243903	-0.276896	-0.11704	-0.126104	-0.143314	-0.0805725	-0.0781234	-0.0704688	-0.194163	-0.204658	-0.183135	-0.279991	-0.2941	-0.282888	-0.308987	-0.30024	-0.258599	-0.27147	-0.261769	-0.279898	0.0693477	0.0629144	0.0430546	-0.247076	-0.253182	-0.263818	-0.265201	0.211959	0.21556	0.210754	0.19973	-0.256494	-0.256221	-0.261529	-0.258874	-0.270799	-0.294522	-0.282688	-0.260153	-0.256476
Pian_3	-0.050843	-0.0881989	-0.1457	-0.0897897	-0.114915	-0.270491	-0.278826	-0.293266	-0.265817	-0.254346	-0.293369	-0.11425	-0.110158	-0.138483	-0.0795629	-0.0866665	-0.0807967	-0.203416	-0.211454	-0.194097	-0.284422	-0.301192	-0.29232	-0.322498	-0.310775	-0.262975	-0.283949	-0.278904	-0.291952	0.0777352	0.084252	0.0514981	-0.260008	-0.273252	-0.274786	-0.276333	0.209198	0.214239	0.211684	0.197833	-0.262337	-0.266262	-0.264153	-0.266677	-0.279204	-0.30004	-0.289581	-0.269315	-0.270553
Pian_4	-0.0531312	-0.094251	-0.141127	-0.0964651	-0.114775	-0.277055	-0.274189	-0.290238	-0.267908	-0.253105	-0.295979	-0.117486	-0.121453	-0.134161	-0.0756624	-0.0806217	-0.0854408	-0.202532	-0.213183	-0.203591	-0.295355	-0.30639	-0.30047	-0.319233	-0.311775	-0.276964	-0.287447	-0.286409	-0.290235	0.0726436	0.0712466	0.048534	-0.266122	-0.270592	-0.275113	-0.273184	0.212342	0.223999	0.222167	0.214937	-0.263835	-0.263009	-0.266894	-0.262754	-0.283516	-0.304782	-0.293658	-0.272582	-0.272085
Pikv_1	-0.0243781	-0.00262058	0.0556848	-0.020733	-0.0143181	-0.0192208	-0.0122052	0.028828	-0.0373391	-0.0369272	0.00399968	-0.0203334	-0.00132266	0.031173	-0.0860899	-0.0884356	-0.0868497	0.0409514	0.0461246	0.0339372	0.0123181	0.024641	0.0161414	-0.0202529	-0.0108004	-0.0555434	-0.0667314	-0.0643014	-0.0581489	-0.00585546	0.00707575	0.0611206	-0.024877	-0.0239786	-0.012788	-0.0193124	-0.0553201	-0.0454004	-0.046467	-0.0502887	-0.0999659	-0.0962957	-0.0968445	-0.102722	0.0275245	0.0286224	0.0262574	-0.0405831	-0.0365545
Pikv_2	-0.0315169	-0.00679086	0.0925321	-0.0231311	-0.0183781	-0.0237839	-0.0173131	0.04471	-0.0500747	-0.0470393	0.0167988	-0.0264502	-0.00904978	0.0631739	-0.093632	-0.10288	-0.0976335	0.0406703	0.0372397	0.0289241	0.0244244	0.0505467	0.030232	-0.0104972	0.00214638	-0.0678842	-0.0770519	-0.072912	-0.0700714	-0.0104818	-0.00281262	0.0867742	-0.0297009	-0.0294402	-0.016385	-0.0244451	-0.0649903	-0.056484	-0.056615	-0.0590618	-0.102018	-0.0952683	-0.0971608	-0.103614	0.0443305	0.0704169	0.0531629	-0.0473627	-0.0406704
Pikv_3	-0.0333085	-0.0106607	0.0759559	-0.0178985	-0.012662	-0.0315718	-0.0162267	0.0382858	-0.0382986	-0.0393724	0.0145471	-0.0264334	-0.00713794	0.046497	-0.0912404	-0.0944009	-0.0913386	0.045343	0.0439265	0.0340271	0.0238521	0.0356766	0.0270843	-0.0227865	-0.0122337	-0.0665086	-0.0774603	-0.0730656	-0.06855	-0.0122879	-0.00375298	0.0710972	-0.0342121	-0.0321519	-0.018862	-0.0250025	-0.0590696	-0.0482313	-0.0497034	-0.0466475	-0.10496	-0.0975297	-0.0988464	-0.106835	0.0331032	0.0452122	0.0383436	-0.0391495	-0.036066
Pul_1	0.0501112	0.0547707	-0.00458952	0.006481	0.00849074	-0.0550299	-0.0587153	-0.0723664	-0.110559	-0.106742	-0.139159	0.0174688	0.0295045	-0.000291861	-0.00923159	-0.0101715	-0.00901608	0.0362133	0.0214006	-0.000210983	-0.129507	-0.141453	-0.140412	-0.09502	-0.104987	-0.0793902	-0.0889346	-0.0869538	-0.0851008	-0.00893208	-0.00656464	-0.0393503	-0.0678963	-0.0705974	-0.0687361	-0.0656006	-0.0154858	-0.0119395	-0.0112399	-0.0149002	-0.0704379	-0.0665132	-0.0662706	-0.0701805	-0.0796157	-0.0890628	-0.0880898	-0.122744	-0.130286
Pul_3	0.0381723	0.0398532	-0.0167529	-0.00344157	0.000462576	-0.0586552	-0.0588281	-0.0824381	-0.105019	-0.0988415	-0.131603	0.0130102	0.0260774	-0.0163771	-0.0177493	-0.0219962	-0.0232069	0.00109109	-0.0148556	-0.0248472	-0.125546	-0.131786	-0.131371	-0.088823	-0.0932306	-0.0700481	-0.0802071	-0.0817346	-0.0773063	0.00709049	0.0123847	-0.0227666	-0.0739476	-0.0754442	-0.075896	-0.0711204	-0.0118683	-0.00857177	-0.00488661	-0.0153109	-0.0652353	-0.060582	-0.0634485	-0.0673653	-0.071537	-0.0830291	-0.0825613	-0.110335	-0.122375
Pul_4	-0.0152347	-0.0136865	0.0765227	-0.000706162	0.0126044	-0.0937078	-0.103026	-0.0433806	-0.186832	-0.179254	-0.134669	0.00304201	0.0123859	0.0632499	-0.00452937	-0.00304593	-0.00345209	-0.0656467	-0.0814156	-0.0705552	-0.135026	-0.129268	-0.128581	-0.0906585	-0.0969183	-0.127098	-0.133335	-0.130497	-0.139025	-0.0116251	-0.0189857	0.0377123	-0.0997715	-0.0989644	-0.100803	-0.0978945	-0.0117489	-0.0119744	-0.0163716	-0.015783	-0.120637	-0.120094	-0.123371	-0.123194	-0.0714189	-0.0598435	-0.0632261	-0.184348	-0.189493
SanKat_1	-0.0383183	-0.0391471	-0.137015	-0.0881137	-0.106779	-0.0650243	-0.0614683	-0.0878415	-0.0353454	-0.034423	-0.0598118	-0.101983	-0.107578	-0.128561	0.0936361	0.0885128	0.0895773	-0.0298528	-0.0111934	-0.066267	-0.0505134	-0.059292	-0.0589492	0.133541	0.123357	0.141044	0.144443	0.14454	0.151967	-0.076015	-0.0638038	-0.102659	-0.070228	-0.0666172	-0.0674387	-0.0706688	-0.0815634	-0.0781255	-0.0762341	-0.0734192	-0.0151591	-0.0127679	-0.0123784	-0.0142141	-0.0143635	-0.0153545	-0.0199234	-0.0375365	-0.0402767
SanKat_2	-0.0358563	-0.0329738	-0.12299	-0.076741	-0.0933167	-0.0627538	-0.0577532	-0.0856202	-0.0392602	-0.0371126	-0.0648883	-0.0852539	-0.0892651	-0.111478	0.0855865	0.0821925	0.0803407	-0.0291022	-0.0170604	-0.066924	-0.0566755	-0.0585152	-0.0590269	0.123566	0.117865	0.128691	0.132609	0.129416	0.139695	-0.0690898	-0.0653072	-0.10227	-0.0710666	-0.0660016	-0.0680658	-0.0702175	-0.089407	-0.0823508	-0.0846448	-0.0805784	-0.0185653	-0.0139633	-0.0159574	-0.0168307	-0.00536506	-0.0105204	-0.012476	-0.0453856	-0.0456003
SanKat_3	-0.0466496	-0.0407516	-0.130315	-0.0870133	-0.100583	-0.0511877	-0.0468665	-0.0752387	-0.0266966	-0.02975	-0.0542341	-0.0905121	-0.096473	-0.123173	0.105096	0.103699	0.103053	-0.0279594	-0.022885	-0.0658661	-0.0441966	-0.0489351	-0.0516743	0.135106	0.128671	0.139901	0.146559	0.143944	0.152442	-0.0756179	-0.0740798	-0.111647	-0.0544806	-0.052536	-0.0554223	-0.0576893	-0.0992199	-0.0950962	-0.0950441	-0.0933107	0.000856856	0.00217709	-0.000938724	-0.00353958	0.00367997	0.00190624	-0.00150909	-0.0290142	-0.0328902
Skoro_2	-0.0448844	-0.0767541	0.0445794	-0.0678448	-0.0647355	-0.166482	-0.155547	-0.0952456	-0.128648	-0.132104	-0.0709989	-0.0648541	-0.0540454	0.0133327	-0.142725	-0.14067	-0.138326	-0.123629	-0.138751	-0.122587	-0.0735315	-0.0491863	-0.0637112	-0.137425	-0.140346	-0.205613	-0.217443	-0.219055	-0.220459	0.139403	0.131376	0.241462	-0.161688	-0.16181	-0.160062	-0.16401	0.0792749	0.0877636	0.0798276	0.0829933	-0.185066	-0.196346	-0.190559	-0.19366	-0.217935	-0.196893	-0.210016	-0.139233	-0.141768
Skoro_3	-0.0376382	-0.0713876	0.0299027	-0.0711712	-0.0636764	-0.170878	-0.151924	-0.101348	-0.127426	-0.126215	-0.0793825	-0.0629154	-0.053214	0.004571	-0.1329	-0.129247	-0.133724	-0.11972	-0.135491	-0.124247	-0.0867745	-0.066106	-0.0762317	-0.148936	-0.147449	-0.197027	-0.211614	-0.214147	-0.212052	0.137926	0.133282	0.229999	-0.163158	-0.163018	-0.158372	-0.160591	0.0826035	0.0933108	0.086078	0.0961348	-0.177886	-0.183599	-0.18146	-0.179953	-0.224095	-0.208684	-0.217419	-0.137887	-0.138452
Skoro_5	-0.0215258	-0.0463548	0.0234263	-0.0399451	-0.0392591	-0.132036	-0.13594	-0.109561	-0.112321	-0.11221	-0.0939589	-0.0350662	-0.0291322	0.00393076	-0.113435	-0.116621	-0.115154	-0.0913338	-0.102913	-0.0773961	-0.0751559	-0.0681175	-0.0801585	-0.137149	-0.140461	-0.168626	-0.188977	-0.1905	-0.187861	0.172595	0.176199	0.234635	-0.144185	-0.146775	-0.136168	-0.141907	0.0587715	0.0694221	0.0653568	0.0643669	-0.169783	-0.168925	-0.169476	-0.17266	-0.180542	-0.175357	-0.183972	-0.124676	-0.130569
Tlem_1	0.0365777	0.0272425	0.0561379	0.0745678	0.0882431	0.00346384	-0.00166917	-0.021325	-0.0691883	-0.0705679	-0.0811882	0.0804719	0.0889541	0.0673373	-0.070072	-0.0682175	-0.0588807	-0.00550982	-0.0116248	0.0139439	-0.0890945	-0.0992811	-0.0946696	-0.110664	-0.108239	-0.0681941	-0.0803921	-0.0702489	-0.0857726	-0.00296701	-0.0090212	-0.0179758	0.0198014	0.0171348	-0.00102143	-0.000884077	-0.00780498	-0.00282263	-0.015381	-0.0149997	-0.0414525	-0.045437	-0.047692	-0.0427179	-0.0868923	-0.10122	-0.0924036	-0.0633038	-0.0633943
Tlem_2	0.0406225	0.0314991	0.0509649	0.0742342	0.0941444	0.00504687	-0.00260666	-0.0176358	-0.0609538	-0.0641965	-0.0778015	0.0823377	0.0851308	0.0597732	-0.0694462	-0.0675887	-0.062393	-0.00372487	-0.0111778	0.00663758	-0.0835983	-0.0900803	-0.092844	-0.100183	-0.106143	-0.0686723	-0.0796551	-0.0775972	-0.0804254	0.0176758	0.00684907	-0.00863354	0.0150992	0.0112579	-0.00436584	-0.00539047	-0.00838339	-0.0104729	-0.024349	-0.0196015	-0.0380466	-0.0430305	-0.0367578	-0.0390206	-0.0703207	-0.0897809	-0.0805286	-0.0597442	-0.0627857
Tlem_3	0.0406175	0.0371888	0.0584831	0.0692698	0.0797656	-0.0014074	0.000512939	-0.0247189	-0.0710624	-0.0677007	-0.0892568	0.0750405	0.0874454	0.0651966	-0.0692662	-0.0711708	-0.0760412	-0.00500421	-0.0074657	0.00399041	-0.0969705	-0.0977248	-0.098245	-0.0992978	-0.104553	-0.0720802	-0.0835952	-0.0858306	-0.0788001	0.0149968	0.00778633	-0.00422387	-0.00283667	0.001985	-0.00334016	0.000411584	-0.0198268	-0.00898911	-0.019736	-0.0161467	-0.0420858	-0.0436695	-0.0464193	-0.0407321	-0.0773141	-0.0920081	-0.0837094	-0.0682075	-0.0714091
Tlem_4	0.0413266	0.0324207	0.0617422	0.0715348	0.0825846	-0.00963118	-0.000849178	-0.0240665	-0.0722056	-0.0704463	-0.0897414	0.0775334	0.0866183	0.0695185	-0.0759422	-0.0757794	-0.0765543	-0.00509444	-0.0125153	0.00254276	-0.0939976	-0.100672	-0.097252	-0.103333	-0.106334	-0.0754257	-0.0850628	-0.0857728	-0.0771215	0.0154547	0.00440485	-0.00344738	0.00229629	0.00689697	-0.00459812	-0.0008099	-0.0135906	-0.00439	-0.014284	-0.00882842	-0.0426668	-0.0471123	-0.0468516	-0.0457539	-0.0770704	-0.0948735	-0.0860221	-0.067414	-0.070985
Ubil_1	0.0461795	0.0408986	0.0191752	0.0431025	0.0543611	0.0849387	0.0784612	0.0588523	-0.0972536	-0.0997816	-0.108996	0.0338922	0.044039	0.0295336	-0.0116999	-0.0084638	-0.00537211	0.0700132	0.062812	0.0823109	-0.114844	-0.126541	-0.118378	-0.0320927	-0.0305164	-0.00132481	-0.0138122	-0.0132065	-0.0104219	0.116992	0.100703	0.103291	0.0868718	0.0909936	0.0911058	0.0852295	-0.0349169	-0.0395321	-0.0378328	-0.0373983	-0.00913144	-0.0171299	-0.015344	-0.0114081	-0.0486092	-0.0503296	-0.0406678	-0.0956891	-0.0983019
Ubil_2	0.0367579	0.0293033	0.00774753	0.0399239	0.0569348	0.0874533	0.077379	0.0611236	-0.0973027	-0.098274	-0.106905	0.0311317	0.0330878	0.0222159	-0.0166864	-0.00611555	0.0031152	0.0746231	0.0673004	0.089849	-0.113045	-0.130116	-0.116913	-0.0304846	-0.0322523	0.00304168	-0.00501765	-0.000883581	-0.0126632	0.115801	0.0981257	0.0987064	0.0980642	0.0981956	0.0895987	0.0888911	-0.0294728	-0.0454113	-0.0423497	-0.0407465	-0.00523889	-0.0160926	-0.0126176	-0.00931214	-0.0422479	-0.0458919	-0.0356525	-0.0929486	-0.0953601
VPec_4	-0.0890843	-0.0651146	-0.122294	-0.0726557	-0.0747817	-0.038964	-0.0505018	-0.0651243	-0.085452	-0.0841556	-0.105004	-0.0813564	-0.0948192	-0.112641	0.1005	0.110869	0.11719	-0.0788047	-0.0772785	-0.067536	-0.10531	-0.11414	-0.101066	-0.119761	-0.118173	-0.0738698	-0.0767265	-0.0786099	-0.0981949	-0.171477	-0.17974	-0.215281	-0.0316199	-0.0349554	-0.0427259	-0.0431207	-0.109027	-0.116845	-0.115721	-0.120252	-0.0790137	-0.0809679	-0.0824053	-0.0880684	-0.0881275	-0.0918037	-0.085781	-0.0800569	-0.0789866
VPec_5	-0.0926463	-0.063993	-0.124301	-0.0611192	-0.0736763	-0.0317414	-0.0496519	-0.0663376	-0.081592	-0.0822391	-0.101393	-0.0789706	-0.0910488	-0.114547	0.0961037	0.101406	0.113773	-0.0786161	-0.0780357	-0.0602256	-0.0966907	-0.111144	-0.100427	-0.113628	-0.109561	-0.066046	-0.073311	-0.0758521	-0.0945639	-0.168802	-0.172089	-0.213927	-0.0365354	-0.0421836	-0.0437302	-0.0445684	-0.112403	-0.121095	-0.112407	-0.12075	-0.0800437	-0.0798689	-0.0847349	-0.0898329	-0.0830832	-0.090487	-0.0866867	-0.0775181	-0.0756206
Karre_1	-0.038995	-0.0751912	-0.131256	-0.0778456	-0.0981596	-0.211994	-0.221079	-0.23828	-0.215315	-0.203005	-0.239103	-0.0956049	-0.0941756	-0.119649	-0.0602978	-0.0582231	-0.0574362	-0.162838	-0.170168	-0.159783	-0.234643	-0.251323	-0.241692	-0.26632	-0.259684	-0.226031	-0.242955	-0.237009	-0.250343	0.0626066	0.0552748	0.022007	-0.210014	-0.218403	-0.226417	-0.22362	0.161702	0.167845	0.167424	0.153184	-0.21723	-0.218562	-0.218038	-0.218996	-0.227613	-0.246119	-0.240137	-0.220254	-0.224308
Karre_2	-0.0683987	-0.110078	-0.0865801	-0.103434	-0.130045	-0.262042	-0.276177	-0.233376	-0.259659	-0.254052	-0.237339	-0.12216	-0.129948	-0.0964549	-0.0989426	-0.0983863	-0.100538	-0.20983	-0.220146	-0.197383	-0.236035	-0.229021	-0.237868	-0.253731	-0.246881	-0.272806	-0.288794	-0.282429	-0.293916	0.0533881	0.056159	0.0949853	-0.260555	-0.271417	-0.274141	-0.277804	0.178782	0.186306	0.18578	0.169805	-0.269292	-0.270731	-0.275834	-0.27216	-0.233849	-0.238363	-0.234574	-0.272774	-0.273808
Karre_4	-0.0710133	-0.10751	-0.0643209	-0.117571	-0.141884	-0.294942	-0.29487	-0.235685	-0.283727	-0.269434	-0.236714	-0.138553	-0.139736	-0.0758682	-0.0999367	-0.100571	-0.10827	-0.220892	-0.236105	-0.225266	-0.242165	-0.228701	-0.234037	-0.260948	-0.254533	-0.297203	-0.30754	-0.31057	-0.314374	0.0590722	0.0608334	0.128224	-0.285899	-0.297052	-0.292911	-0.29445	0.184971	0.19515	0.191467	0.184287	-0.286973	-0.284157	-0.283511	-0.279246	-0.220056	-0.215242	-0.217747	-0.295141	-0.291651
Bidz_1	-0.113003	-0.0814132	-0.0515035	-0.0958371	-0.111989	-0.0622271	-0.0708838	-0.0329293	-0.102308	-0.0975315	-0.0623792	-0.101455	-0.106224	-0.0673928	0.0845083	0.0854987	0.0824185	-0.0995821	-0.103206	-0.0977309	-0.0587254	-0.0459317	-0.0504648	-0.0537714	-0.0604549	-0.0984522	-0.109763	-0.111035	-0.115211	-0.178434	-0.178366	-0.138305	-0.074403	-0.0740188	-0.0748863	-0.0728347	-0.138606	-0.13924	-0.135782	-0.139684	-0.114184	-0.113172	-0.115295	-0.121396	-0.036185	-0.020546	-0.0298063	-0.113404	-0.111901
Bidz_2	-0.124537	-0.0922153	-0.0144892	-0.105719	-0.117381	-0.0734626	-0.0770142	-0.0163842	-0.111705	-0.112792	-0.0443729	-0.116818	-0.119599	-0.0514705	0.072126	0.0745817	0.0736157	-0.109912	-0.111383	-0.105276	-0.0469968	-0.0165007	-0.0286607	-0.0372128	-0.0409842	-0.107457	-0.116946	-0.120682	-0.126211	-0.195449	-0.202854	-0.124441	-0.0804029	-0.0794699	-0.0787036	-0.078042	-0.144081	-0.146316	-0.143906	-0.148486	-0.117689	-0.118667	-0.122821	-0.125295	-0.013016	0.0197634	-0.00329625	-0.118949	-0.119203
Bidz_3	-0.115632	-0.0855877	-0.0312494	-0.100299	-0.111504	-0.0722784	-0.0700635	-0.0211218	-0.108479	-0.109186	-0.0591162	-0.109427	-0.116628	-0.0521523	0.0825708	0.0843201	0.0844567	-0.10901	-0.105197	-0.105788	-0.0643489	-0.0405504	-0.0427266	-0.0494212	-0.0512767	-0.0984516	-0.107348	-0.110229	-0.119973	-0.193177	-0.204371	-0.142438	-0.0764067	-0.0749164	-0.0763019	-0.0737315	-0.140785	-0.144399	-0.139322	-0.144774	-0.114206	-0.112688	-0.117813	-0.119498	-0.0278009	-0.00603534	-0.0195502	-0.116535	-0.118062
Kore_1	0.026781	-0.0410769	-0.0707568	-0.0485171	-0.051956	-0.185442	-0.17903	-0.205151	-0.198051	-0.190536	-0.237081	-0.0420605	-0.0372015	-0.0672105	-0.146603	-0.148839	-0.155548	-0.15538	-0.171578	-0.143437	-0.240655	-0.248788	-0.238903	-0.265112	-0.261002	-0.235751	-0.243895	-0.243615	-0.243025	0.394157	0.394357	0.40477	-0.185137	-0.188448	-0.18827	-0.184356	0.178934	0.187544	0.185677	0.185487	-0.212999	-0.21258	-0.213656	-0.21684	-0.305663	-0.315633	-0.311422	-0.220737	-0.227889
Kore_2	0.0530968	-0.011138	-0.0495243	-0.0360832	-0.0372911	-0.184106	-0.177159	-0.201515	-0.196694	-0.19163	-0.230837	-0.0283015	-0.0187184	-0.0376703	-0.156457	-0.157087	-0.160591	-0.12891	-0.150223	-0.141824	-0.233387	-0.244592	-0.232848	-0.263118	-0.262426	-0.234311	-0.243069	-0.241492	-0.241752	0.382089	0.375602	0.385206	-0.183222	-0.18653	-0.187619	-0.183513	0.182009	0.191016	0.190562	0.195952	-0.206112	-0.205676	-0.203297	-0.207286	-0.299956	-0.303495	-0.306756	-0.211396	-0.21887
Kore_4	-0.00221548	-0.0683879	0.0120617	-0.0700985	-0.0740018	-0.214637	-0.212896	-0.160249	-0.230448	-0.232748	-0.189946	-0.0603809	-0.061347	-0.00901862	-0.171788	-0.172563	-0.175607	-0.185386	-0.211049	-0.178441	-0.196194	-0.178176	-0.185365	-0.212807	-0.212787	-0.258717	-0.270036	-0.269261	-0.272331	0.389311	0.386815	0.491847	-0.210051	-0.219549	-0.214935	-0.21101	0.167742	0.180217	0.176179	0.177461	-0.244032	-0.242233	-0.242925	-0.243458	-0.255281	-0.240566	-0.254392	-0.250909	-0.255297
Lecc_1	0.0520388	0.0640436	0.0567567	0.0438545	0.0681409	-0.00642314	0.00444724	-0.0201412	-0.0291808	-0.0336251	-0.0505562	0.0532332	0.0698623	0.0513503	-0.0758308	-0.0761136	-0.075692	0.0279301	0.03319	0.019982	-0.0523762	-0.0518461	-0.0457598	-0.0479382	-0.046714	-0.0287744	-0.0312865	-0.0270443	-0.0261864	-0.0758481	-0.0643255	-0.0844486	-0.0142807	-0.0103595	-0.00844666	-0.00731829	-0.0667265	-0.0633558	-0.0667145	-0.062379	0.00859521	0.0081898	0.0105516	0.0123215	-0.067006	-0.0781527	-0.0693463	-0.0325124	-0.0332547
Lecc_2	0.0444674	0.0599671	0.0520756	0.0378262	0.0610833	-0.0136783	-0.0038778	-0.0346103	-0.0246327	-0.0332401	-0.0504262	0.0557582	0.0705096	0.0430487	-0.0679758	-0.0702863	-0.0713526	0.0175593	0.0291102	0.0107003	-0.0485881	-0.0499675	-0.0473097	-0.0400129	-0.0362038	-0.0236572	-0.0276687	-0.0203737	-0.0167035	-0.0769594	-0.0671607	-0.0875883	-0.0217661	-0.0187608	-0.0175274	-0.0183309	-0.0619894	-0.0602497	-0.058638	-0.0621737	0.00952813	0.0120252	0.0105248	0.00864744	-0.0643676	-0.0755803	-0.0667898	-0.0328159	-0.03393
Lecc_3	0.0412471	0.0592367	0.0508769	0.0378148	0.0663146	-0.0144241	-0.00398153	-0.0242134	-0.0254303	-0.0308008	-0.0493785	0.0517555	0.0634051	0.0441872	-0.0720874	-0.0736818	-0.0707486	0.024163	0.0312095	0.0184306	-0.0506249	-0.047415	-0.0429134	-0.0418376	-0.0403427	-0.0220896	-0.0235164	-0.0187313	-0.0153457	-0.0751519	-0.0656412	-0.0824863	-0.0178917	-0.0141968	-0.011871	-0.0127667	-0.0716374	-0.0718598	-0.069172	-0.0650291	0.0116428	0.013031	0.0123078	0.00985464	-0.0675517	-0.0699133	-0.0660249	-0.0337984	-0.0336715
Raco_1	-0.0152551	-0.0499934	-0.136407	-0.101022	-0.121339	-0.250097	-0.248655	-0.262065	-0.231359	-0.225191	-0.264512	-0.112944	-0.107051	-0.13059	-0.0781528	-0.0760354	-0.085007	-0.154464	-0.155207	-0.185619	-0.264266	-0.275455	-0.269459	-0.291055	-0.287827	-0.260391	-0.26741	-0.265567	-0.266394	0.0499589	0.0527596	0.0222117	-0.247012	-0.251198	-0.255241	-0.251584	0.163397	0.174662	0.17418	0.161649	-0.250034	-0.246283	-0.249714	-0.242416	-0.271991	-0.285008	-0.276948	-0.249501	-0.247499
Raco_2	-0.0133975	-0.0401983	-0.138783	-0.105935	-0.1207	-0.240042	-0.236186	-0.254822	-0.224277	-0.213887	-0.261706	-0.120846	-0.11448	-0.135576	-0.0690764	-0.0663949	-0.0721545	-0.164324	-0.15992	-0.184116	-0.257937	-0.265157	-0.25946	-0.286469	-0.279195	-0.246447	-0.256569	-0.257121	-0.260125	0.0545978	0.0587034	0.031573	-0.23515	-0.244584	-0.244149	-0.2441	0.154954	0.162738	0.16149	0.153141	-0.24117	-0.237459	-0.238901	-0.234525	-0.259554	-0.269499	-0.265877	-0.24232	-0.24101
Raco_3	-0.0179751	-0.0470166	-0.137412	-0.0984553	-0.120668	-0.252936	-0.249415	-0.266755	-0.234166	-0.22562	-0.270676	-0.113201	-0.109801	-0.132525	-0.0671845	-0.0687442	-0.0734112	-0.158708	-0.164357	-0.189994	-0.26774	-0.280356	-0.273046	-0.294888	-0.291459	-0.261632	-0.27215	-0.266901	-0.271709	0.05482	0.0573326	0.0325498	-0.249128	-0.257118	-0.256393	-0.255918	0.1695	0.184892	0.182332	0.175046	-0.25109	-0.246197	-0.248171	-0.243795	-0.267343	-0.285177	-0.277093	-0.252472	-0.250426
OldOli_10	-0.10922	-0.108255	-0.0473307	-0.110883	-0.120964	0.026474	0.0344465	0.091804	0.486318	0.493419	0.578252	-0.113597	-0.12124	-0.0679305	-0.0597863	-0.0605921	-0.0614066	0.150455	0.154727	0.15803	0.579832	0.599812	0.586795	0.0942473	0.089256	0.0108228	0.0264961	0.0247468	0.024905	-0.131594	-0.11828	-0.0678371	0.0245048	0.026371	0.0355268	0.0306529	-0.0134312	-0.0222361	-0.0195445	-0.0159427	0.0365492	0.0389171	0.0428595	0.0429715	0.1083	0.124389	0.110355	0.518188	0.518559
OldOli_11	-0.111241	-0.10932	-0.064804	-0.126819	-0.131018	0.0270156	0.0365907	0.0992207	0.509157	0.505107	0.595981	-0.121555	-0.130059	-0.0783193	-0.0555722	-0.0501965	-0.0557329	0.156925	0.158718	0.158401	0.578207	0.60083	0.601859	0.0848676	0.0798381	0.012084	0.0261373	0.0235077	0.0277648	-0.143664	-0.132332	-0.0942921	0.0271927	0.0367401	0.0380554	0.0352296	-0.011316	-0.0157629	-0.0166563	-0.00146076	0.0349002	0.0337793	0.0378795	0.0402314	0.0901819	0.110992	0.0901105	0.531904	0.537932
OldOli_12	-0.118196	-0.111538	-0.0544593	-0.123276	-0.130203	0.0271059	0.033572	0.0916916	0.504001	0.500336	0.597372	-0.120035	-0.133196	-0.0734976	-0.0545633	-0.0534235	-0.0557283	0.146189	0.148854	0.155146	0.57732	0.609416	0.606997	0.0941895	0.0948199	0.0152014	0.0296669	0.0298698	0.0293078	-0.140632	-0.134929	-0.0855797	0.0252638	0.0306623	0.0288941	0.0298966	-0.0118143	-0.02052	-0.0180617	-0.0120085	0.0350875	0.0345808	0.0347927	0.0379884	0.100423	0.122251	0.0984302	0.529015	0.533303
OldOli_13	-0.110763	-0.10852	-0.06346	-0.114039	-0.116071	0.0404772	0.0379825	0.0873711	0.501998	0.494775	0.582394	-0.109514	-0.121701	-0.0815523	-0.0576652	-0.0577005	-0.0557116	0.141478	0.147072	0.158936	0.565041	0.590404	0.587735	0.0865668	0.0854209	0.0217505	0.0372646	0.0355065	0.0337067	-0.143323	-0.134503	-0.0988217	0.0317535	0.0393373	0.0345528	0.0344917	-0.00692045	-0.0148058	-0.0146208	-0.0105547	0.0406514	0.0382061	0.039355	0.0394179	0.0880897	0.104436	0.0845769	0.524434	0.528693
OldOli_14	-0.113953	-0.104904	-0.0598144	-0.117973	-0.125318	0.0282192	0.0349187	0.094071	0.50629	0.49793	0.591354	-0.118846	-0.126757	-0.0771988	-0.0507581	-0.0495942	-0.0515126	0.142684	0.14691	0.153097	0.573357	0.599663	0.598739	0.0865136	0.0863329	0.0182078	0.0329971	0.0318953	0.0331374	-0.138279	-0.130409	-0.0902214	0.0302411	0.0354075	0.0353902	0.033749	-0.0130581	-0.0198738	-0.0176008	-0.00948703	0.0399955	0.0367631	0.0397116	0.0410759	0.091559	0.113366	0.0925713	0.528527	0.534159
[truncated: 98 more columns]
