# Supplementary material for: Genetic Diversity of Common Olive (Olea europaea L.) Cultivars from Nikita Botanical Gardens Collection Revealed Using RAD-Seq Method
Source: Genes (Basel). 2023 Jun 23;14(7):1323. doi: 10.3390/genes14071323 (PMC10379327; doi:10.3390/genes14071323)
Supplement: Supplementary file 1 [file genes-14-01323-s001.zip › Table S6.xlsx]

## Sheet: Лист3
SampleName	spots	bases	spots_with_mates	avgLength	size_MB	Experiment	LibraryName	LibraryStrategy	LibrarySelection	LibrarySource	LibraryLayout	BioProject	Sample	BioSample	TaxID	ScientificName
olive_46	256711	71482974	256711	278	23	SRX20434909	olive_46	RAD-Seq	Restriction Digest	GENOMIC	PAIRED	PRJNA973272	SRS17702022	SAMN35126515	4146	Olea europaea
olive_40	246409	68809620	246409	279	22	SRX20434860	olive_40	RAD-Seq	Restriction Digest	GENOMIC	PAIRED	PRJNA973272	SRS17701939	SAMN35126441	4146	Olea europaea
VPec_4	1585097	475529100	1585097	300	159	SRX20434796	VPec_4	RAD-Seq	Restriction Digest	GENOMIC	PAIRED	PRJNA973272	SRS17701912	SAMN35126547	4146	Olea europaea
olive_10	4388329	1131696370	4388329	257	396	SRX20434780	olive_10	RAD-Seq	Restriction Digest	GENOMIC	PAIRED	PRJNA973272	SRS17701904	SAMN35126532	4146	Olea europaea
Nadg_4	3112170	933651000	3112170	300	312	SRX20434832	Nadg_4	RAD-Seq	Restriction Digest	GENOMIC	PAIRED	PRJNA973272	SRS17701983	SAMN35126481	4146	Olea europaea
Tavl_1	1972619	591785700	1972619	300	198	SRX20434807	Tavl_1	RAD-Seq	Restriction Digest	GENOMIC	PAIRED	PRJNA973272	SRS17701961	SAMN35126458	4146	Olea europaea
Gorv_5	3317692	995307600	3317692	300	327	SRX20434823	Gorv_5	RAD-Seq	Restriction Digest	GENOMIC	PAIRED	PRJNA973272	SRS17701976	SAMN35126472	4146	Olea europaea
Pian_1	1357747	407324100	1357747	300	134	SRX20434772	Pian_1	RAD-Seq	Restriction Digest	GENOMIC	PAIRED	PRJNA973272	SRS17701888	SAMN35126525	4146	Olea europaea
Otur_3	1494882	448464600	1494882	300	146	SRX20434804	Otur_3	RAD-Seq	Restriction Digest	GENOMIC	PAIRED	PRJNA973272	SRS17701957	SAMN35126455	4146	Olea europaea
Otur_1	1567380	470214000	1567380	300	156	SRX20434803	Otur_1	RAD-Seq	Restriction Digest	GENOMIC	PAIRED	PRJNA973272	SRS17701953	SAMN35126454	4146	Olea europaea
Nisiot_5	1478035	429172824	1478035	290	146	SRX20434769	Nisiot_5	RAD-Seq	Restriction Digest	GENOMIC	PAIRED	PRJNA973272	SRS17701886	SAMN35126522	4146	Olea europaea
Tavl_2	1503355	435635634	1503355	289	148	SRX20434808	Tavl_2	RAD-Seq	Restriction Digest	GENOMIC	PAIRED	PRJNA973272	SRS17701960	SAMN35126459	4146	Olea europaea
olive_12	3543003	919723089	3543003	259	321	SRX20434781	olive_12	RAD-Seq	Restriction Digest	GENOMIC	PAIRED	PRJNA973272	SRS17701895	SAMN35126533	4146	Olea europaea
Nadg_5	2176254	652876200	2176254	300	217	SRX20434834	Nadg_5	RAD-Seq	Restriction Digest	GENOMIC	PAIRED	PRJNA973272	SRS17701987	SAMN35126482	4146	Olea europaea
Nadg_1	1813254	524669760	1813254	289	180	SRX20434829	Nadg_1	RAD-Seq	Restriction Digest	GENOMIC	PAIRED	PRJNA973272	SRS17701980	SAMN35126478	4146	Olea europaea
Tlem_1	1323822	397146600	1323822	300	132	SRX20434789	Tlem_1	RAD-Seq	Restriction Digest	GENOMIC	PAIRED	PRJNA973272	SRS17701905	SAMN35126541	4146	Olea europaea
Otur_5	1335735	387485514	1335735	290	134	SRX20434806	Otur_5	RAD-Seq	Restriction Digest	GENOMIC	PAIRED	PRJNA973272	SRS17701956	SAMN35126457	4146	Olea europaea
Tavl_3	1279850	371797656	1279850	290	126	SRX20434809	Tavl_3	RAD-Seq	Restriction Digest	GENOMIC	PAIRED	PRJNA973272	SRS17701959	SAMN35126460	4146	Olea europaea
Lomash_3	1488941	432323214	1488941	290	147	SRX20434826	Lomash_3	RAD-Seq	Restriction Digest	GENOMIC	PAIRED	PRJNA973272	SRS17701979	SAMN35126475	4146	Olea europaea
Ubil_2	2127478	638243400	2127478	300	215	SRX20434795	Ubil_2	RAD-Seq	Restriction Digest	GENOMIC	PAIRED	PRJNA973272	SRS17701910	SAMN35126546	4146	Olea europaea
Lomash_4	1951671	585501300	1951671	300	195	SRX20434827	Lomash_4	RAD-Seq	Restriction Digest	GENOMIC	PAIRED	PRJNA973272	SRS17701985	SAMN35126476	4146	Olea europaea
Nadg_3	1209160	350392134	1209160	289	121	SRX20434831	Nadg_3	RAD-Seq	Restriction Digest	GENOMIC	PAIRED	PRJNA973272	SRS17701982	SAMN35126480	4146	Olea europaea
Ubil_1	1367513	396905694	1367513	290	138	SRX20434794	Ubil_1	RAD-Seq	Restriction Digest	GENOMIC	PAIRED	PRJNA973272	SRS17701909	SAMN35126545	4146	Olea europaea
Pian_4	982489	285551562	982489	290	96	SRX20434775	Pian_4	RAD-Seq	Restriction Digest	GENOMIC	PAIRED	PRJNA973272	SRS17701891	SAMN35126528	4146	Olea europaea
Nadg_2	2527559	730919148	2527559	289	253	SRX20434830	Nadg_2	RAD-Seq	Restriction Digest	GENOMIC	PAIRED	PRJNA973272	SRS17701981	SAMN35126479	4146	Olea europaea
Tavl_4	2269280	658412430	2269280	290	222	SRX20434810	Tavl_4	RAD-Seq	Restriction Digest	GENOMIC	PAIRED	PRJNA973272	SRS17701963	SAMN35126461	4146	Olea europaea
Skoro_3	2646540	741170158	2646540	280	248	SRX20434787	Skoro_3	RAD-Seq	Restriction Digest	GENOMIC	PAIRED	PRJNA973272	SRS17701902	SAMN35126539	4146	Olea europaea
Pian_3	735729	213060978	735729	289	72	SRX20434774	Pian_3	RAD-Seq	Restriction Digest	GENOMIC	PAIRED	PRJNA973272	SRS17701887	SAMN35126527	4146	Olea europaea
Agl_1	1258832	364895718	1258832	289	123	SRX20434835	Agl_1	RAD-Seq	Restriction Digest	GENOMIC	PAIRED	PRJNA973272	SRS17701988	SAMN35126483	4146	Olea europaea
Gorv_3	1833448	550034400	1833448	300	182	SRX20434821	Gorv_3	RAD-Seq	Restriction Digest	GENOMIC	PAIRED	PRJNA973272	SRS17701972	SAMN35126471	4146	Olea europaea
Tifli4	1884580	527903376	1884580	280	174	SRX20434801	Tifli4	RAD-Seq	Restriction Digest	GENOMIC	PAIRED	PRJNA973272	SRS17701917	SAMN35126435	4146	Olea europaea
Tolg_2	925135	268723794	925135	290	90	SRX20434813	Tolg_2	RAD-Seq	Restriction Digest	GENOMIC	PAIRED	PRJNA973272	SRS17701965	SAMN35126463	4146	Olea europaea
Pul4	2013065	564399965	2013065	280	187	SRX20434782	Pul4	RAD-Seq	Restriction Digest	GENOMIC	PAIRED	PRJNA973272	SRS17701898	SAMN35126534	4146	Olea europaea
Otur_4	1219052	352845114	1219052	289	122	SRX20434805	Otur_4	RAD-Seq	Restriction Digest	GENOMIC	PAIRED	PRJNA973272	SRS17701955	SAMN35126456	4146	Olea europaea
Lomash_5	1926696	578008800	1926696	300	192	SRX20434828	Lomash_5	RAD-Seq	Restriction Digest	GENOMIC	PAIRED	PRJNA973272	SRS17701977	SAMN35126477	4146	Olea europaea
Lomash_2	918378	265855050	918378	289	89	SRX20434825	Lomash_2	RAD-Seq	Restriction Digest	GENOMIC	PAIRED	PRJNA973272	SRS17701978	SAMN35126474	4146	Olea europaea
VPec_5	1359161	407748300	1359161	300	135	SRX20434797	VPec_5	RAD-Seq	Restriction Digest	GENOMIC	PAIRED	PRJNA973272	SRS17701911	SAMN35126548	4146	Olea europaea
Agl_2	2111989	611476608	2111989	289	209	SRX20434836	Agl_2	RAD-Seq	Restriction Digest	GENOMIC	PAIRED	PRJNA973272	SRS17701986	SAMN35126484	4146	Olea europaea
Tlem_4	913787	265531866	913787	290	90	SRX20434793	Tlem_4	RAD-Seq	Restriction Digest	GENOMIC	PAIRED	PRJNA973272	SRS17701914	SAMN35126544	4146	Olea europaea
Niki4	1218807	341512052	1218807	280	113	SRX20434768	Niki4	RAD-Seq	Restriction Digest	GENOMIC	PAIRED	PRJNA973272	SRS17701884	SAMN35126432	4146	Olea europaea
Pikv_3	1748375	488196129	1748375	279	167	SRX20434778	Pikv_3	RAD-Seq	Restriction Digest	GENOMIC	PAIRED	PRJNA973272	SRS17701894	SAMN35126531	4146	Olea europaea
Obil4	1653054	462604951	1653054	279	156	SRX20434802	Obil4	RAD-Seq	Restriction Digest	GENOMIC	PAIRED	PRJNA973272	SRS17701954	SAMN35126453	4146	Olea europaea
Dalm_6	1575943	472782900	1575943	300	158	SRX20434811	Dalm_6	RAD-Seq	Restriction Digest	GENOMIC	PAIRED	PRJNA973272	SRS17701964	SAMN35126426	4146	Olea europaea
Tlem_2	715596	214678800	715596	300	70	SRX20434791	Tlem_2	RAD-Seq	Restriction Digest	GENOMIC	PAIRED	PRJNA973272	SRS17701907	SAMN35126542	4146	Olea europaea
Pian_2	887030	266109000	887030	300	86	SRX20434773	Pian_2	RAD-Seq	Restriction Digest	GENOMIC	PAIRED	PRJNA973272	SRS17701889	SAMN35126526	4146	Olea europaea
Gorv_1	1258071	364073778	1258071	289	123	SRX20434819	Gorv_1	RAD-Seq	Restriction Digest	GENOMIC	PAIRED	PRJNA973272	SRS17701971	SAMN35126469	4146	Olea europaea
olive_51	482012	134535160	482012	279	43	SRX20434822	olive_51	RAD-Seq	Restriction Digest	GENOMIC	PAIRED	PRJNA973272	SRS17701975	SAMN35126427	4146	Olea europaea
olive_38	260975	72863344	260975	279	23	SRX20434798	olive_38	RAD-Seq	Restriction Digest	GENOMIC	PAIRED	PRJNA973272	SRS17701913	SAMN35126549	4146	Olea europaea
Tossi_1	1304857	365496293	1304857	280	124	SRX20434816	Tossi_1	RAD-Seq	Restriction Digest	GENOMIC	PAIRED	PRJNA973272	SRS17701966	SAMN35126466	4146	Olea europaea
Tlem_3	799671	231633954	799671	289	78	SRX20434792	Tlem_3	RAD-Seq	Restriction Digest	GENOMIC	PAIRED	PRJNA973272	SRS17701908	SAMN35126543	4146	Olea europaea
Skoro_2	1349082	378019641	1349082	280	127	SRX20434786	Skoro_2	RAD-Seq	Restriction Digest	GENOMIC	PAIRED	PRJNA973272	SRS17701901	SAMN35126538	4146	Olea europaea
Pikv_2	1339544	375299178	1339544	280	127	SRX20434777	Pikv_2	RAD-Seq	Restriction Digest	GENOMIC	PAIRED	PRJNA973272	SRS17701893	SAMN35126530	4146	Olea europaea
Tossi_2	1555869	435601198	1555869	279	148	SRX20434817	Tossi_2	RAD-Seq	Restriction Digest	GENOMIC	PAIRED	PRJNA973272	SRS17701968	SAMN35126467	4146	Olea europaea
Gorv_2	1128678	327626658	1128678	290	111	SRX20434820	Gorv_2	RAD-Seq	Restriction Digest	GENOMIC	PAIRED	PRJNA973272	SRS17701970	SAMN35126470	4146	Olea europaea
Tolg_3	1722134	499323336	1722134	289	168	SRX20434814	Tolg_3	RAD-Seq	Restriction Digest	GENOMIC	PAIRED	PRJNA973272	SRS17701967	SAMN35126464	4146	Olea europaea
Karre2	807822	226439792	807822	280	75	SRX20434799	Karre2	RAD-Seq	Restriction Digest	GENOMIC	PAIRED	PRJNA973272	SRS17701915	SAMN35126550	4146	Olea europaea
olive_49	650933	181593410	650933	278	58	SRX20434790	olive_49	RAD-Seq	Restriction Digest	GENOMIC	PAIRED	PRJNA973272	SRS17701906	SAMN35126434	4146	Olea europaea
olive_42	536769	149316754	536769	278	49	SRX20434833	olive_42	RAD-Seq	Restriction Digest	GENOMIC	PAIRED	PRJNA973272	SRS17701984	SAMN35126428	4146	Olea europaea
Tolg_4	1632381	472965624	1632381	289	159	SRX20434815	Tolg_4	RAD-Seq	Restriction Digest	GENOMIC	PAIRED	PRJNA973272	SRS17701973	SAMN35126465	4146	Olea europaea
Tossi_3	1087387	304546662	1087387	280	103	SRX20434818	Tossi_3	RAD-Seq	Restriction Digest	GENOMIC	PAIRED	PRJNA973272	SRS17701969	SAMN35126468	4146	Olea europaea
Lomash_1	1106980	320938482	1106980	289	108	SRX20434824	Lomash_1	RAD-Seq	Restriction Digest	GENOMIC	PAIRED	PRJNA973272	SRS17701974	SAMN35126473	4146	Olea europaea
Tolg_1	1028046	297863874	1028046	289	100	SRX20434812	Tolg_1	RAD-Seq	Restriction Digest	GENOMIC	PAIRED	PRJNA973272	SRS17701962	SAMN35126462	4146	Olea europaea
olive_39	397233	110884517	397233	279	35	SRX20434779	olive_39	RAD-Seq	Restriction Digest	GENOMIC	PAIRED	PRJNA973272	SRS17701896	SAMN35126433	4146	Olea europaea
Skoro_5	701087	196537456	701087	280	66	SRX20434788	Skoro_5	RAD-Seq	Restriction Digest	GENOMIC	PAIRED	PRJNA973272	SRS17701903	SAMN35126540	4146	Olea europaea
Karre4	1758918	493011328	1758918	280	162	SRX20434800	Karre4	RAD-Seq	Restriction Digest	GENOMIC	PAIRED	PRJNA973272	SRS17701916	SAMN35126551	4146	Olea europaea
Pikv_1	1203362	336887728	1203362	279	115	SRX20434776	Pikv_1	RAD-Seq	Restriction Digest	GENOMIC	PAIRED	PRJNA973272	SRS17701892	SAMN35126529	4146	Olea europaea
olive_8	6679462	1769939065	6679462	264	615	SRX20434901	olive_8	RAD-Seq	Restriction Digest	GENOMIC	PAIRED	PRJNA973272	SRS17702014	SAMN35126508	4146	Olea europaea
Niki2_4	4145706	1156661323	4145706	279	386	SRX20434894	Niki2_4	RAD-Seq	Restriction Digest	GENOMIC	PAIRED	PRJNA973272	SRS17702007	SAMN35126430	4146	Olea europaea
Niki_5_3	4302146	1290643800	4302146	300	425	SRX20434869	Niki_5_3	RAD-Seq	Restriction Digest	GENOMIC	PAIRED	PRJNA973272	SRS17701949	SAMN35126449	4146	Olea europaea
Bakin_1	1420785	413249472	1420785	290	140	SRX20434848	Bakin_1	RAD-Seq	Restriction Digest	GENOMIC	PAIRED	PRJNA973272	SRS17701928	SAMN35126436	4146	Olea europaea
olive_5	3148106	877369623	3148106	278	308	SRX20434842	olive_5	RAD-Seq	Restriction Digest	GENOMIC	PAIRED	PRJNA973272	SRS17701921	SAMN35126556	4146	Olea europaea
Niki_5_4	1047031	303075660	1047031	289	104	SRX20434870	Niki_5_4	RAD-Seq	Restriction Digest	GENOMIC	PAIRED	PRJNA973272	SRS17701951	SAMN35126450	4146	Olea europaea
OldOli_11	3271751	914000784	3271751	279	304	SRX20434852	OldOli_11	RAD-Seq	Restriction Digest	GENOMIC	PAIRED	PRJNA973272	SRS17701932	SAMN35126565	4146	Olea europaea
Niki_35_1	1334609	386396268	1334609	289	134	SRX20434886	Niki_35_1	RAD-Seq	Restriction Digest	GENOMIC	PAIRED	PRJNA973272	SRS17701999	SAMN35126494	4146	Olea europaea
Guk_4	949833	274853916	949833	289	94	SRX20434895	Guk_4	RAD-Seq	Restriction Digest	GENOMIC	PAIRED	PRJNA973272	SRS17702008	SAMN35126502	4146	Olea europaea
Nisiot_3	1229797	356345112	1229797	289	120	SRX20434876	Nisiot_3	RAD-Seq	Restriction Digest	GENOMIC	PAIRED	PRJNA973272	SRS17702027	SAMN35126521	4146	Olea europaea
Niki_5_2	1480576	444172800	1480576	300	146	SRX20434868	Niki_5_2	RAD-Seq	Restriction Digest	GENOMIC	PAIRED	PRJNA973272	SRS17701948	SAMN35126448	4146	Olea europaea
Bakin_2	2918686	875605800	2918686	300	293	SRX20434856	Bakin_2	RAD-Seq	Restriction Digest	GENOMIC	PAIRED	PRJNA973272	SRS17701936	SAMN35126437	4146	Olea europaea
Niki_35_2	977101	283527840	977101	290	98	SRX20434887	Niki_35_2	RAD-Seq	Restriction Digest	GENOMIC	PAIRED	PRJNA973272	SRS17702000	SAMN35126495	4146	Olea europaea
Agl_4	2688753	806625900	2688753	300	270	SRX20434877	Agl_4	RAD-Seq	Restriction Digest	GENOMIC	PAIRED	PRJNA973272	SRS17701991	SAMN35126486	4146	Olea europaea
olive_13	2361089	653736038	2361089	276	233	SRX20434844	olive_13	RAD-Seq	Restriction Digest	GENOMIC	PAIRED	PRJNA973272	SRS17701922	SAMN35126558	4146	Olea europaea
olive_15	2534544	705909720	2534544	278	251	SRX20434846	olive_15	RAD-Seq	Restriction Digest	GENOMIC	PAIRED	PRJNA973272	SRS17701927	SAMN35126560	4146	Olea europaea
Niki_33_1	1191770	345516828	1191770	289	117	SRX20434884	Niki_33_1	RAD-Seq	Restriction Digest	GENOMIC	PAIRED	PRJNA973272	SRS17701997	SAMN35126492	4146	Olea europaea
Ispan_2	1033292	300030486	1033292	290	100	SRX20434898	Ispan_2	RAD-Seq	Restriction Digest	GENOMIC	PAIRED	PRJNA973272	SRS17702011	SAMN35126505	4146	Olea europaea
Nisiot_1	812155	235164000	812155	289	79	SRX20434874	Nisiot_1	RAD-Seq	Restriction Digest	GENOMIC	PAIRED	PRJNA973272	SRS17702026	SAMN35126519	4146	Olea europaea
Agl_3	809108	234808206	809108	290	80	SRX20434837	Agl_3	RAD-Seq	Restriction Digest	GENOMIC	PAIRED	PRJNA973272	SRS17701990	SAMN35126485	4146	Olea europaea
Bakin_3	2407184	722155200	2407184	300	239	SRX20434857	Bakin_3	RAD-Seq	Restriction Digest	GENOMIC	PAIRED	PRJNA973272	SRS17701938	SAMN35126438	4146	Olea europaea
Koker_4	978117	283628754	978117	289	96	SRX20434907	Koker_4	RAD-Seq	Restriction Digest	GENOMIC	PAIRED	PRJNA973272	SRS17702020	SAMN35126513	4146	Olea europaea
Nisiot_2	790392	229438476	790392	290	77	SRX20434875	Nisiot_2	RAD-Seq	Restriction Digest	GENOMIC	PAIRED	PRJNA973272	SRS17702028	SAMN35126520	4146	Olea europaea
Ispan_1	807202	234882570	807202	290	79	SRX20434897	Ispan_1	RAD-Seq	Restriction Digest	GENOMIC	PAIRED	PRJNA973272	SRS17702009	SAMN35126504	4146	Olea europaea
Asco_4	1705264	478564075	1705264	280	161	SRX20434889	Asco_4	RAD-Seq	Restriction Digest	GENOMIC	PAIRED	PRJNA973272	SRS17702002	SAMN35126497	4146	Olea europaea
olive_23	2490074	691842814	2490074	277	244	SRX20434879	olive_23	RAD-Seq	Restriction Digest	GENOMIC	PAIRED	PRJNA973272	SRS17701989	SAMN35126488	4146	Olea europaea
Dalm_5	684830	198375108	684830	289	68	SRX20434872	Dalm_5	RAD-Seq	Restriction Digest	GENOMIC	PAIRED	PRJNA973272	SRS17701958	SAMN35126425	4146	Olea europaea
Koker_2	1841472	552441600	1841472	300	182	SRX20434904	Koker_2	RAD-Seq	Restriction Digest	GENOMIC	PAIRED	PRJNA973272	SRS17702017	SAMN35126511	4146	Olea europaea
Guk_5	609795	176190408	609795	288	60	SRX20434896	Guk_5	RAD-Seq	Restriction Digest	GENOMIC	PAIRED	PRJNA973272	SRS17702010	SAMN35126503	4146	Olea europaea
olive_4	1718782	479614338	1718782	279	169	SRX20434841	olive_4	RAD-Seq	Restriction Digest	GENOMIC	PAIRED	PRJNA973272	SRS17701919	SAMN35126555	4146	Olea europaea
olive_14	2036872	563991325	2036872	276	202	SRX20434845	olive_14	RAD-Seq	Restriction Digest	GENOMIC	PAIRED	PRJNA973272	SRS17701924	SAMN35126559	4146	Olea europaea
Niki_5_1	1426098	427829400	1426098	300	141	SRX20434867	Niki_5_1	RAD-Seq	Restriction Digest	GENOMIC	PAIRED	PRJNA973272	SRS17701947	SAMN35126447	4146	Olea europaea
Kore4	1845872	517264894	1845872	280	174	SRX20434843	Kore4	RAD-Seq	Restriction Digest	GENOMIC	PAIRED	PRJNA973272	SRS17701923	SAMN35126557	4146	Olea europaea
Koker_1	1587292	476187600	1587292	300	158	SRX20434903	Koker_1	RAD-Seq	Restriction Digest	GENOMIC	PAIRED	PRJNA973272	SRS17702016	SAMN35126510	4146	Olea europaea
Koker_3	1436351	430905300	1436351	300	140	SRX20434906	Koker_3	RAD-Seq	Restriction Digest	GENOMIC	PAIRED	PRJNA973272	SRS17702019	SAMN35126512	4146	Olea europaea
Niki_33_2	885396	257329206	885396	290	87	SRX20434885	Niki_33_2	RAD-Seq	Restriction Digest	GENOMIC	PAIRED	PRJNA973272	SRS17701998	SAMN35126493	4146	Olea europaea
Nik37_3	1786774	500770078	1786774	280	168	SRX20434912	Nik37_3	RAD-Seq	Restriction Digest	GENOMIC	PAIRED	PRJNA973272	SRS17702024	SAMN35126518	4146	Olea europaea
ChernRan_2	1211045	339751434	1211045	280	115	SRX20434891	ChernRan_2	RAD-Seq	Restriction Digest	GENOMIC	PAIRED	PRJNA973272	SRS17702004	SAMN35126499	4146	Olea europaea
olive_55	917270	256435215	917270	279	82	SRX20434888	olive_55	RAD-Seq	Restriction Digest	GENOMIC	PAIRED	PRJNA973272	SRS17702001	SAMN35126496	4146	Olea europaea
Niki_29_2	1148890	332364576	1148890	289	115	SRX20434882	Niki_29_2	RAD-Seq	Restriction Digest	GENOMIC	PAIRED	PRJNA973272	SRS17701994	SAMN35126491	4146	Olea europaea
olive_60	418363	116635427	418363	278	37	SRX20434873	olive_60	RAD-Seq	Restriction Digest	GENOMIC	PAIRED	PRJNA973272	SRS17701950	SAMN35126452	4146	Olea europaea
OldOli_14	2207541	617863359	2207541	279	205	SRX20434855	OldOli_14	RAD-Seq	Restriction Digest	GENOMIC	PAIRED	PRJNA973272	SRS17701934	SAMN35126568	4146	Olea europaea
Mishor_3	1250248	349663060	1250248	279	118	SRX20434864	Mishor_3	RAD-Seq	Restriction Digest	GENOMIC	PAIRED	PRJNA973272	SRS17701943	SAMN35126444	4146	Olea europaea
Dalm4	1807025	506852513	1807025	280	171	SRX20434861	Dalm4	RAD-Seq	Restriction Digest	GENOMIC	PAIRED	PRJNA973272	SRS17701940	SAMN35126424	4146	Olea europaea
Bidz_3	1178270	329734315	1178270	279	111	SRX20434840	Bidz_3	RAD-Seq	Restriction Digest	GENOMIC	PAIRED	PRJNA973272	SRS17701925	SAMN35126554	4146	Olea europaea
Nik37_1	1541324	431947206	1541324	280	145	SRX20434910	Nik37_1	RAD-Seq	Restriction Digest	GENOMIC	PAIRED	PRJNA973272	SRS17702023	SAMN35126516	4146	Olea europaea
ChernRan_3	806653	226095192	806653	280	76	SRX20434892	ChernRan_3	RAD-Seq	Restriction Digest	GENOMIC	PAIRED	PRJNA973272	SRS17702005	SAMN35126500	4146	Olea europaea
Nik6_1	1431750	401007904	1431750	280	135	SRX20434865	Nik6_1	RAD-Seq	Restriction Digest	GENOMIC	PAIRED	PRJNA973272	SRS17701945	SAMN35126445	4146	Olea europaea
olive_53	1400458	389549157	1400458	278	125	SRX20434883	olive_53	RAD-Seq	Restriction Digest	GENOMIC	PAIRED	PRJNA973272	SRS17701996	SAMN35126429	4146	Olea europaea
olive_24	1991399	553011228	1991399	277	196	SRX20434880	olive_24	RAD-Seq	Restriction Digest	GENOMIC	PAIRED	PRJNA973272	SRS17701993	SAMN35126489	4146	Olea europaea
olive_45	344647	96003456	344647	278	31	SRX20434871	olive_45	RAD-Seq	Restriction Digest	GENOMIC	PAIRED	PRJNA973272	SRS17701952	SAMN35126451	4146	Olea europaea
Mishor_1	772073	216360837	772073	280	73	SRX20434862	Mishor_1	RAD-Seq	Restriction Digest	GENOMIC	PAIRED	PRJNA973272	SRS17701942	SAMN35126442	4146	Olea europaea
Bidz_1	1335084	373139603	1335084	279	128	SRX20434838	Bidz_1	RAD-Seq	Restriction Digest	GENOMIC	PAIRED	PRJNA973272	SRS17701918	SAMN35126552	4146	Olea europaea
OldOli_12	1812849	506184779	1812849	279	169	SRX20434853	OldOli_12	RAD-Seq	Restriction Digest	GENOMIC	PAIRED	PRJNA973272	SRS17701933	SAMN35126566	4146	Olea europaea
olive_52	546539	152193452	546539	278	49	SRX20434905	olive_52	RAD-Seq	Restriction Digest	GENOMIC	PAIRED	PRJNA973272	SRS17702018	SAMN35126431	4146	Olea europaea
Ispan_3	369181	106988970	369181	289	35	SRX20434899	Ispan_3	RAD-Seq	Restriction Digest	GENOMIC	PAIRED	PRJNA973272	SRS17702013	SAMN35126506	4146	Olea europaea
Nik37_2	1151307	322911454	1151307	280	108	SRX20434911	Nik37_2	RAD-Seq	Restriction Digest	GENOMIC	PAIRED	PRJNA973272	SRS17702025	SAMN35126517	4146	Olea europaea
olive_37	378214	105689396	378214	279	34	SRX20434908	olive_37	RAD-Seq	Restriction Digest	GENOMIC	PAIRED	PRJNA973272	SRS17702021	SAMN35126514	4146	Olea europaea
olive_22	2159961	599208085	2159961	277	214	SRX20434878	olive_22	RAD-Seq	Restriction Digest	GENOMIC	PAIRED	PRJNA973272	SRS17701995	SAMN35126487	4146	Olea europaea
olive_2	1714158	478303071	1714158	279	169	SRX20434893	olive_2	RAD-Seq	Restriction Digest	GENOMIC	PAIRED	PRJNA973272	SRS17702006	SAMN35126501	4146	Olea europaea
ChernRan_1	957931	268524605	957931	280	91	SRX20434890	ChernRan_1	RAD-Seq	Restriction Digest	GENOMIC	PAIRED	PRJNA973272	SRS17702003	SAMN35126498	4146	Olea europaea
Niki_29_1	1276114	369425190	1276114	289	128	SRX20434881	Niki_29_1	RAD-Seq	Restriction Digest	GENOMIC	PAIRED	PRJNA973272	SRS17701992	SAMN35126490	4146	Olea europaea
Nik6_3	976347	273646968	976347	280	91	SRX20434866	Nik6_3	RAD-Seq	Restriction Digest	GENOMIC	PAIRED	PRJNA973272	SRS17701946	SAMN35126446	4146	Olea europaea
Mishor_2	1096329	307314458	1096329	280	103	SRX20434863	Mishor_2	RAD-Seq	Restriction Digest	GENOMIC	PAIRED	PRJNA973272	SRS17701941	SAMN35126443	4146	Olea europaea
OldOli_13	1360288	380378772	1360288	279	127	SRX20434854	OldOli_13	RAD-Seq	Restriction Digest	GENOMIC	PAIRED	PRJNA973272	SRS17701935	SAMN35126567	4146	Olea europaea
OldOli_10	1005207	281669856	1005207	280	94	SRX20434851	OldOli_10	RAD-Seq	Restriction Digest	GENOMIC	PAIRED	PRJNA973272	SRS17701931	SAMN35126564	4146	Olea europaea
Bidz_2	1337484	374418361	1337484	279	127	SRX20434839	Bidz_2	RAD-Seq	Restriction Digest	GENOMIC	PAIRED	PRJNA973272	SRS17701920	SAMN35126553	4146	Olea europaea
olive_20	10927173	3021679359	10927173	276	1057	SRX20434849	olive_20	RAD-Seq	Restriction Digest	GENOMIC	PAIRED	PRJNA973272	SRS17701930	SAMN35126562	4146	Olea europaea
olive_7	7039520	1868737112	7039520	265	647	SRX20434900	olive_7	RAD-Seq	Restriction Digest	GENOMIC	PAIRED	PRJNA973272	SRS17702012	SAMN35126507	4146	Olea europaea
olive_9	6162557	1646256613	6162557	267	573	SRX20434902	olive_9	RAD-Seq	Restriction Digest	GENOMIC	PAIRED	PRJNA973272	SRS17702015	SAMN35126509	4146	Olea europaea
olive_21	7912459	2196333489	7912459	277	768	SRX20434850	olive_21	RAD-Seq	Restriction Digest	GENOMIC	PAIRED	PRJNA973272	SRS17701929	SAMN35126563	4146	Olea europaea
olive_19	13432436	3719660002	13432436	276	1298	SRX20434847	olive_19	RAD-Seq	Restriction Digest	GENOMIC	PAIRED	PRJNA973272	SRS17701926	SAMN35126561	4146	Olea europaea
olive_18	36065031	9631649710	36065031	267	3398	SRX20434767	olive_18	RAD-Seq	Restriction Digest	GENOMIC	PAIRED	PRJNA973272	SRS17701882	SAMN35126423	4146	Olea europaea
olive_17	49500672	13201220236	49500672	266	4633	SRX20434766	olive_17	RAD-Seq	Restriction Digest	GENOMIC	PAIRED	PRJNA973272	SRS17701883	SAMN35126422	4146	Olea europaea
olive_26	24149210	6508448997	24149210	269	2294	SRX20434770	olive_26	RAD-Seq	Restriction Digest	GENOMIC	PAIRED	PRJNA973272	SRS17701890	SAMN35126523	4146	Olea europaea
olive_31	35735361	9471685989	35735361	265	3304	SRX20434783	olive_31	RAD-Seq	Restriction Digest	GENOMIC	PAIRED	PRJNA973272	SRS17701899	SAMN35126535	4146	Olea europaea
olive_27	24741646	6675736768	24741646	269	2333	SRX20434771	olive_27	RAD-Seq	Restriction Digest	GENOMIC	PAIRED	PRJNA973272	SRS17701885	SAMN35126524	4146	Olea europaea
olive_32	22919646	6053984690	22919646	264	2117	SRX20434784	olive_32	RAD-Seq	Restriction Digest	GENOMIC	PAIRED	PRJNA973272	SRS17701897	SAMN35126536	4146	Olea europaea
olive_33	25021542	6632598632	25021542	265	2321	SRX20434785	olive_33	RAD-Seq	Restriction Digest	GENOMIC	PAIRED	PRJNA973272	SRS17701900	SAMN35126537	4146	Olea europaea
olive_34	29386769	7989104387	29386769	271	2809	SRX20434858	olive_34	RAD-Seq	Restriction Digest	GENOMIC	PAIRED	PRJNA973272	SRS17701937	SAMN35126439	4146	Olea europaea
olive_35	35358576	9632884198	35358576	272	3359	SRX20434859	olive_35	RAD-Seq	Restriction Digest	GENOMIC	PAIRED	PRJNA973272	SRS17701944	SAMN35126440	4146	Olea europaea
